# Supplementary material
Source: Research Square preprint supplement (doi:10.21203/rs.3.rs-9448785/v1)
Supplement: Supplementary file 1 [file 2c0cba4342ecdf7c116d0f5a.xlsx]

## Sheet: Index
Supplementary Tables for EMMA-STRAT: A Multi-Omics Based Machine Learning Framework for Stratification of Endometrial Carcinoma Molecular Subtypes and MSI Status Naisarg Patel1,2, Andres Salumets1,2,3*, Vijayachitra Modhukur 1,2*
1. Celvia CC AS, Tartu, Estonia 2. Department of Obstetrics and Gynecology, Institute of Clinical Medicine, University of Tartu, L. Puusepa 8, Tartu, Estonia 3. Division of Obstetrics and Gynecology, Department of Clinical Science, Intervention and Technology (CLINTEC), Karolinska Institute, and Karolinska University Hospital, Stockholm, Sweden * To whom correspondence should be addressed. Dr. Vi…
Supplementary Table S1	Integrated summary of multi-omics datasets across each omics layer
Supplementary Table S2	Features selected for MSI status classification
Supplementary Table S3	Features selected for genomic subtype classification
Supplementary Table S4	Performance of single-omics models for MSI status classification across all evaluation sets
Supplementary Table S5	Performance of single-omics models for genomic subtype classification across all evaluation sets
Supplementary Table S6	Performance of multi-omics models for MSI status classification across all evaluation sets
Supplementary Table S7	Performance of multi-omics models for genomic subtype classification across all evaluation sets
Supplementary Table S8	SHAP feature importance scores for the MSI status classification model
Supplementary Table S9	Class-specific and mean SHAP feature importance scores for the genomic subtype classification model
Supplementary Table S10	Software tools, packages, and databases used in this study

## Sheet: Supplementary Table-S1
Supplementary Table S1: Integrated summary of multi-omics datasets across each omics layer. For Set-1, Set-2, and Set-3, the number of samples and adjusted feature dimensions are reported at the raw, processed and model-input stages.
Omics Type	Set	Raw (Samples × Features)	Processed (Samples × Features)	Model (Samples × Features)
DNA Methylation	Set-1	587 × 11,851	448 × 4,155	433 × 2,576
	Set-2	102 × 13,875	97 × 4,120	95 × 2,576
	Set-3	138 × 13,875	109 × 8,027	108 × 2,576
miRNA	Set-1	564 × 1,701	546 × 616	433 × 503
	Set-2	115 × 1,701	115 × 663	95 × 503
	Set-3	166 × 1,701	166 × 614	108 × 503
RNA	Set-1	573 × 60,657	554 × 27,889	433 × 27,366
	Set-2	183 × 60,657	183 × 43,784	95 × 27,366
	Set-3	294 × 60,657	294 × 45,958	108 × 27,366

## Sheet: Supplementary Table-S2
Supplementary Table S2. Features selected for MSI status classification. Top 20 features identified by Support Vector Machine-based Recursive Feature Elimination (SVM-RFE). Features are drawn from three molecular layers: mRNA expression (R), DNA methylation (D), and miRNA expression (M). RNA features are annotated with corresponding HGNC gene symbols alongside their original Ensembl identifiers.
Methylation	RNA	miRNA		RNA Gene ID
HIST1H3E	ENSG00000179101.5	hsa-mir-452		AL590139.1
HOXA10	ENSG00000163584.18	hsa-mir-4787		RPL22L1
PRSS3	ENSG00000246705.4	hsa-mir-132		H2AFJ
KDM2B	ENSG00000057468.7	hsa-mir-31		MSH4
TNFAIP8L3	ENSG00000243181.2	hsa-mir-1305		AC087343.1
SEC31B	ENSG00000205502.4	hsa-mir-3913		C2CD4B
C10orf99	ENSG00000231084.2	hsa-mir-210		RPL22P24
ABCB11	ENSG00000231503.4	hsa-mir-708		PTMAP4
C21orf54	ENSG00000178458.5	hsa-mir-26b		H3F3AP6
HOXB13	ENSG00000144214.10	hsa-mir-5696		LYG1
PCP4L1	ENSG00000076242.16	hsa-mir-1910		MLH1
C3orf63	ENSG00000162639.16	hsa-mir-1296		HENMT1
C4orf37	ENSG00000130005.13	hsa-mir-155		GAMT
COL3A1	ENSG00000184719.12	hsa-mir-3609		RNLS
KCNK2	ENSG00000149972.11	hsa-mir-520b		CNTN5
CHRNB1	ENSG00000178567.8	hsa-mir-375		EPM2AIP1
HIST1H2BI	ENSG00000198134.3	hsa-mir-4652		AC007537.1
C2orf78	ENSG00000170468.8	hsa-mir-7974		RIOX1
PCDH20	ENSG00000229385.2	hsa-mir-2276		AC010975.1
NPHS1	ENSG00000277406.2	hsa-mir-1294		AC245407.1

## Sheet: Supplementary Table-S3
Supplementary Table S3. Features selected for genomic subtype classification. Top 50 features identified by Least Absolute Shrinkage and Selection Operator-based Recursive Feature Elimination (LASSO-RFE). Features span three molecular layers: mRNA expression (R), DNA methylation (D), and miRNA expression (M). RNA features are annotated with corresponding HGNC gene symbols alongside their original…
Methylation	RNA	miRNA		RNA Gene ID
C3orf63	ENSG00000076242.16	hsa-mir-155		MLH1
FILIP1	ENSG00000178567.8	hsa-mir-23b		EPM2AIP1
CHRNB1	ENSG00000144214.10	hsa-mir-1266		LYG1
SDHAP3	ENSG00000231503.4	hsa-mir-210		PTMAP4
PAX9	ENSG00000163584.18	hsa-mir-4652		RPL22L1
CYP2B7P1	ENSG00000184719.12	hsa-mir-651		RNLS
TMPRSS12	ENSG00000154760.14	hsa-mir-624		SLFN13
CD5L	ENSG00000198134.3	hsa-mir-139		AC007537.1
FOXB2	ENSG00000162639.16	hsa-mir-490		HENMT1
SLC16A4	ENSG00000205502.4	hsa-mir-34a		C2CD4B
CUZD1	ENSG00000243181.2	hsa-mir-140		AC087343.1
RARA	ENSG00000057468.7	hsa-mir-659		MSH4
HOXA4	ENSG00000170468.8	hsa-mir-1910		RIOX1
PCDHB11	ENSG00000273305.1	hsa-mir-4728		AC009237.15
GPR150	ENSG00000287080.2	hsa-mir-548o		H3C3
TNPO2	ENSG00000179101.5	hsa-mir-33a		AL590139.1
SLC22A16	ENSG00000252421.1	hsa-mir-934		RNU6-1069P
ZNF204P	ENSG00000010932.17	hsa-mir-26b		FMO1
LILRA1	ENSG00000272913.1	hsa-mir-548j		AC009237.14
HIST1H3J	ENSG00000229689.3	hsa-mir-6744		AC009237.3
HIST1H2BE	ENSG00000277406.2	hsa-mir-2114		AC245407.1
MSL3L2	ENSG00000178458.5	hsa-mir-132		H3F3AP6
ROBO1	ENSG00000270938.1	hsa-mir-217		RAP2CP1
LIN7A	ENSG00000278071.1	hsa-mir-147b		AL161669.3
C22orf28	ENSG00000115970.18	hsa-mir-708		THADA
HIST1H2AI	ENSG00000228223.3	hsa-mir-197		HCG11
IGSF9B	ENSG00000254126.8	hsa-mir-1287		CD8B2
C2orf74	ENSG00000272944.1	hsa-mir-514a		AC079834.2
ZNF366	ENSG00000147889.18	hsa-mir-205		CDKN2A
KCNK2	ENSG00000231084.2	hsa-mir-130b		RPL22P24
HTR1D	ENSG00000119698.12	hsa-mir-589		PPP4R4
RETNLB	ENSG00000164002.11	hsa-mir-4521		EXO5
HIST1H2AB	ENSG00000165548.11	hsa-mir-27b		TMEM63C
ZNF223	ENSG00000164430.16	hsa-mir-138		CGAS
C3AR1	ENSG00000116014.10	hsa-mir-3074		KISS1R
CYP8B1	ENSG00000274372.5	hsa-mir-499a		AC239803.4
ST18	ENSG00000273132.1	hsa-mir-425		AL355312.3
HIST1H3C	ENSG00000182247.10	hsa-mir-1468		UBE2E2
ELF5	ENSG00000242670.1	hsa-mir-4781		RPL22P13
PGAP1	ENSG00000232412.1	hsa-mir-223		AL121601.1
FGD2	ENSG00000220848.5	hsa-mir-320d		RPS18P9
LOC285370	ENSG00000234636.2	hsa-let-7c		MED14OS
C2orf78	ENSG00000267365.1	hsa-mir-126		KCNJ2-AS1
C4orf37	ENSG00000276900.1	hsa-mir-153		AC023157.3
NRTN	ENSG00000246705.4	hsa-mir-378a		H2AFJ
ZFP106	ENSG00000277873.1	hsa-mir-5010		AC131159.2
PABPC4L	ENSG00000115598.10	hsa-mir-95		IL1RL2
CPXM1	ENSG00000167476.10	hsa-mir-744		JSRP1
HOXA7	ENSG00000185088.14	hsa-mir-3065		RPS27L
ZNF217	ENSG00000287431.1	hsa-mir-5696		RENO1

## Sheet: Supplementary Table-S4
Supplementary Table S4. Performance of single-omics models for MSI status classification across all evaluation sets. Single-omics model performance evaluated across three molecular layers (mRNA expression, DNA methylation, and miRNA expression) for binary MSI versus MSS classification. Results are reported for all combinations of model architecture, feature selection method (ANOVA, Random Forest,…
Model	Feature Selection Method	Prediction Task	Number of Features	Data Type	Validation Balanced Accuracy	Validation Macro F1	Test Set 2 Balanced Accuracy	Test Set 2 Macro F1	Test Set 3 Balanced Accuracy	Test Set 3 Macro F1	Avg External Accuracy	Avg External Macro F1
MLP	SVM	MSI Status	100	RNA Seq	0.988	0.9811	0.877	0.8251	0.9028	0.889	0.8899	0.85705
MLP	SVM	MSI Status	200	RNA Seq	0.9748	0.9714	0.9008	0.8405	0.8264	0.8309	0.8636	0.8357
MLP	SVM	MSI Status	50	RNA Seq	0.9688	0.9622	0.9452	0.891	0.875	0.8519	0.9101	0.87145
MLP	LASSO	MSI Status	100	RNA Seq	0.9616	0.9616	0.9351	0.9007	0.8403	0.8356	0.8877	0.86815
MLP	LASSO	MSI Status	150	RNA Seq	0.9616	0.9616	0.9282	0.8881	0.875	0.8595	0.9016	0.8738
LightGBM	SVM	MSI Status	150	RNA Seq	0.9545	0.9611	0.925	0.911	0.8194	0.8283	0.8722	0.86965
Random Forest	SVM	MSI Status	50	RNA Seq	0.9545	0.9611	0.9625	0.9548	0.8333	0.8473	0.8979	0.90105
MLP	SVM	MSI Status	150	Methylation	0.9556	0.9524	0.8738	0.844	0.7917	0.7917	0.8327	0.81785
MLP	LASSO	MSI Status	50	RNA Seq	0.9556	0.9524	0.9589	0.9161	0.8819	0.8688	0.9204	0.89245
MLP	LASSO	MSI Status	150	Methylation	0.9556	0.9524	0.802	0.7504	0.7708	0.7651	0.7864	0.75775
GNN	SVM	MSI Status	200	Methylation	0.9556	0.9524	0.8633	0.8029	0.8542	0.8542	0.8587	0.82855
LightGBM	LASSO	MSI Status	150	RNA Seq	0.9485	0.9517	0.925	0.911	0.8681	0.881	0.8965	0.896
LightGBM	LASSO	MSI Status	200	RNA Seq	0.9485	0.9517	0.9556	0.9407	0.8472	0.8594	0.9014	0.90005
MLP	ANOVA F-test	MSI Status	20	RNA Seq	0.9485	0.9517	0.9044	0.8723	0.8889	0.8862	0.8966	0.87925
MLP	SVM	MSI Status	200	Methylation	0.9485	0.9517	0.9113	0.8849	0.8333	0.8264	0.8723	0.85565
MLP	Random Forest	MSI Status	100	RNA Seq	0.9485	0.9517	0.9008	0.8405	0.7917	0.8036	0.8462	0.82205
LightGBM	LASSO	MSI Status	100	RNA Seq	0.9485	0.9517	0.9488	0.927	0.8403	0.8498	0.8945	0.8884
GNN	Random Forest	MSI Status	100	RNA Seq	0.9485	0.9517	0.9282	0.8881	0.8264	0.8377	0.8773	0.8629
LightGBM	Random Forest	MSI Status	200	RNA Seq	0.9485	0.9517	0.9488	0.927	0.8264	0.8446	0.8876	0.8858
LightGBM	Random Forest	MSI Status	50	RNA Seq	0.9413	0.951	0.9318	0.9246	0.8542	0.8691	0.893	0.89685
Random Forest	LASSO	MSI Status	10	RNA Seq	0.9413	0.951	0.9693	0.9693	0.9028	0.8972	0.9361	0.93325
MLP	SVM	MSI Status	150	RNA Seq	0.9639	0.9447	0.9247	0.8555	0.875	0.8595	0.8999	0.8575
MLP	LASSO	MSI Status	200	RNA Seq	0.9496	0.9432	0.9419	0.9137	0.875	0.875	0.9084	0.89435
MLP	ANOVA F-test	MSI Status	200	RNA Seq	0.9425	0.9425	0.9145	0.8638	0.8403	0.8498	0.8774	0.8568
Linear SVM	SVM	MSI Status	100	RNA Seq	0.9425	0.9425	0.8976	0.8601	0.8472	0.8521	0.8724	0.8561
GNN	LASSO	MSI Status	200	Methylation	0.9425	0.9425	0.8907	0.8482	0.7639	0.7675	0.8273	0.80785
GNN	LASSO	MSI Status	150	RNA Seq	0.9425	0.9425	0.9282	0.8881	0.875	0.875	0.9016	0.88155
LightGBM	SVM	MSI Status	200	RNA Seq	0.9425	0.9425	0.925	0.911	0.8403	0.8498	0.8827	0.8804
Linear SVM	SVM	MSI Status	200	RNA Seq	0.9425	0.9425	0.9145	0.8638	0.8542	0.8616	0.8843	0.8627
MLP	Random Forest	MSI Status	50	RNA Seq	0.9425	0.9425	0.9214	0.8758	0.8819	0.8688	0.9017	0.8723
LightGBM	ANOVA F-test	MSI Status	200	RNA Seq	0.9353	0.9416	0.9387	0.9387	0.8611	0.8712	0.8999	0.90495
Linear SVM	SVM	MSI Status	200	Methylation	0.9353	0.9416	0.8467	0.8467	0.7708	0.7764	0.8088	0.81155
LightGBM	SVM	MSI Status	50	RNA Seq	0.9353	0.9416	0.8875	0.8685	0.8472	0.8521	0.8673	0.8603
LightGBM	SVM	MSI Status	20	RNA Seq	0.9353	0.9416	0.9077	0.852	0.8819	0.8767	0.8948	0.86435
Random Forest	LASSO	MSI Status	20	RNA Seq	0.9353	0.9416	0.9488	0.927	0.9097	0.9069	0.9292	0.91695
GNN	SVM	MSI Status	100	RNA Seq	0.9353	0.9416	0.9351	0.9007	0.8056	0.8034	0.8703	0.85205
GNN	SVM	MSI Status	150	Methylation	0.9353	0.9416	0.877	0.8251	0.7986	0.7944	0.8378	0.80975
LightGBM	Random Forest	MSI Status	150	RNA Seq	0.9353	0.9416	0.9488	0.927	0.7917	0.8154	0.8702	0.8712
Random Forest	SVM	MSI Status	200	RNA Seq	0.9282	0.9407	0.9693	0.9693	0.8403	0.8498	0.9048	0.90955
GNN	LASSO	MSI Status	100	RNA Seq	0.9282	0.9407	0.9419	0.9137	0.8472	0.8448	0.8945	0.87925
Random Forest	LASSO	MSI Status	50	RNA Seq	0.9282	0.9407	0.9693	0.9693	0.8264	0.8309	0.8979	0.9001
Random Forest	SVM	MSI Status	100	RNA Seq	0.9211	0.9397	0.9762	0.9844	0.8333	0.8473	0.9047	0.91585
MLP	LASSO	MSI Status	200	Methylation	0.9436	0.9342	0.877	0.8251	0.8056	0.8098	0.8413	0.81745
LightGBM	LASSO	MSI Status	20	RNA Seq	0.9436	0.9342	0.9145	0.8638	0.8958	0.8877	0.9052	0.87575
GNN	LASSO	MSI Status	20	RNA Seq	0.9364	0.9333	0.9282	0.8881	0.9028	0.8728	0.9155	0.88045
GNN	LASSO	MSI Status	200	RNA Seq	0.9364	0.9333	0.9214	0.8758	0.8681	0.8655	0.8947	0.87065
GNN	SVM	MSI Status	200	RNA Seq	0.9364	0.9333	0.9077	0.852	0.8403	0.8426	0.874	0.8473
MLP	ANOVA F-test	MSI Status	50	RNA Seq	0.9364	0.9333	0.9589	0.9161	0.9167	0.9081	0.9378	0.9121
MLP	SVM	MSI Status	10	RNA Seq	0.9364	0.9333	0.9556	0.9407	0.875	0.8672	0.9153	0.90395
MLP	ANOVA F-test	MSI Status	150	RNA Seq	0.9293	0.9324	0.9282	0.8881	0.8958	0.8877	0.912	0.8879
LightGBM	Random Forest	MSI Status	100	RNA Seq	0.9293	0.9324	0.9318	0.9246	0.8333	0.8473	0.8825	0.88595
GNN	SVM	MSI Status	50	RNA Seq	0.9293	0.9324	0.9178	0.8441	0.8958	0.8796	0.9068	0.86185
MLP	Random Forest	MSI Status	150	RNA Seq	0.9293	0.9324	0.9315	0.8671	0.8403	0.8426	0.8859	0.85485
Random Forest	SVM	MSI Status	20	RNA Seq	0.9293	0.9324	0.9556	0.9407	0.8958	0.8958	0.9257	0.91825
Random Forest	Random Forest	MSI Status	50	RNA Seq	0.9222	0.9313	0.9318	0.9246	0.8264	0.8377	0.8791	0.88115
LightGBM	ANOVA F-test	MSI Status	150	RNA Seq	0.9222	0.9313	0.9455	0.9532	0.8125	0.8255	0.879	0.88935
GNN	ANOVA F-test	MSI Status	200	RNA Seq	0.9222	0.9313	0.9318	0.9246	0.8194	0.8349	0.8756	0.87975
Linear SVM	SVM	MSI Status	150	RNA Seq	0.9222	0.9313	0.9351	0.9007	0.8889	0.8862	0.912	0.89345
LightGBM	SVM	MSI Status	200	Methylation	0.915	0.9302	0.8601	0.8206	0.7778	0.7739	0.819	0.79725
Linear SVM	SVM	MSI Status	150	Methylation	0.915	0.9302	0.833	0.822	0.8125	0.819	0.8227	0.8205
Random Forest	SVM	MSI Status	150	RNA Seq	0.915	0.9302	0.9455	0.9532	0.8125	0.8319	0.879	0.89255
GNN	LASSO	MSI Status	10	RNA Seq	0.915	0.9302	0.9351	0.9007	0.8958	0.8958	0.9155	0.89825
GNN	ANOVA F-test	MSI Status	10	Methylation	0.9375	0.9253	0.7782	0.7342	0.7361	0.7221	0.7571	0.72815
GNN	LASSO	MSI Status	50	RNA Seq	0.9304	0.9243	0.8598	0.7756	0.9028	0.8728	0.8813	0.8242
Random Forest	SVM	MSI Status	10	RNA Seq	0.9304	0.9243	0.9625	0.9548	0.9306	0.9188	0.9466	0.9368
LightGBM	SVM	MSI Status	10	RNA Seq	0.9304	0.9243	0.9351	0.9007	0.8958	0.8796	0.9155	0.89015
GNN	Random Forest	MSI Status	50	RNA Seq	0.9304	0.9243	0.9315	0.8671	0.8264	0.8309	0.879	0.849
MLP	SVM	MSI Status	20	RNA Seq	0.9304	0.9243	0.9282	0.8881	0.9097	0.8902	0.9189	0.88915
MLP	ANOVA F-test	MSI Status	10	RNA Seq	0.9233	0.9233	0.908	0.908	0.8264	0.8241	0.8672	0.86605
Random Forest	ANOVA F-test	MSI Status	100	RNA Seq	0.9233	0.9233	0.9455	0.9532	0.8056	0.8224	0.8756	0.8878
GNN	Random Forest	MSI Status	200	RNA Seq	0.9233	0.9233	0.9077	0.852	0.8194	0.8283	0.8636	0.84015
MLP	Random Forest	MSI Status	200	RNA Seq	0.9233	0.9233	0.911	0.8329	0.8264	0.8309	0.8687	0.8319
Linear SVM	LASSO	MSI Status	100	Methylation	0.9233	0.9233	0.8637	0.8516	0.7778	0.7909	0.8208	0.82125
MLP	LASSO	MSI Status	20	RNA Seq	0.9233	0.9233	0.9282	0.8881	0.9167	0.8997	0.9224	0.8939
Linear SVM	SVM	MSI Status	50	RNA Seq	0.9233	0.9233	0.9214	0.8758	0.8611	0.8486	0.8912	0.8622
GNN	ANOVA F-test	MSI Status	50	RNA Seq	0.9233	0.9233	0.9351	0.9007	0.8264	0.8173	0.8808	0.859
LightGBM	Random Forest	MSI Status	20	RNA Seq	0.9233	0.9233	0.9419	0.9137	0.8125	0.819	0.8772	0.86635
Linear SVM	LASSO	MSI Status	150	RNA Seq	0.9161	0.9221	0.9282	0.8881	0.8472	0.8521	0.8877	0.8701
Random Forest	ANOVA F-test	MSI Status	200	RNA Seq	0.9161	0.9221	0.9387	0.9387	0.8056	0.8224	0.8721	0.88055
Linear SVM	LASSO	MSI Status	20	RNA Seq	0.9161	0.9221	0.9282	0.8881	0.9097	0.8985	0.9189	0.8933
MLP	SVM	MSI Status	100	Methylation	0.9161	0.9221	0.8806	0.8561	0.8056	0.8161	0.8431	0.8361
Linear SVM	Random Forest	MSI Status	200	RNA Seq	0.9161	0.9221	0.9282	0.8881	0.8056	0.8161	0.8669	0.8521
Linear SVM	LASSO	MSI Status	10	RNA Seq	0.9161	0.9221	0.9488	0.927	0.9167	0.9081	0.9327	0.91755
Linear SVM	LASSO	MSI Status	150	Methylation	0.9161	0.9221	0.8637	0.8516	0.7986	0.8129	0.8312	0.83225
GNN	ANOVA F-test	MSI Status	20	RNA Seq	0.9161	0.9221	0.8976	0.8601	0.8264	0.8241	0.862	0.8421
Random Forest	Random Forest	MSI Status	100	RNA Seq	0.9161	0.9221	0.9318	0.9246	0.8194	0.8349	0.8756	0.87975
Linear SVM	ANOVA F-test	MSI Status	50	RNA Seq	0.9161	0.9221	0.9419	0.9137	0.8611	0.8636	0.9015	0.88865
LightGBM	SVM	MSI Status	100	RNA Seq	0.9161	0.9221	0.8943	0.8813	0.8125	0.8255	0.8534	0.8534
GNN	Random Forest	MSI Status	20	RNA Seq	0.9161	0.9221	0.9113	0.8849	0.8542	0.8616	0.8827	0.87325
MLP	Random Forest	MSI Status	20	RNA Seq	0.9161	0.9221	0.9214	0.8758	0.8403	0.8356	0.8809	0.8557
GNN	Random Forest	MSI Status	150	RNA Seq	0.9161	0.9221	0.9214	0.8758	0.8125	0.8255	0.8669	0.85065
LightGBM	LASSO	MSI Status	50	RNA Seq	0.9161	0.9221	0.9113	0.8849	0.8333	0.8333	0.8723	0.8591
Linear SVM	LASSO	MSI Status	200	RNA Seq	0.9161	0.9221	0.9419	0.9137	0.8681	0.8732	0.905	0.89345
MLP	ANOVA F-test	MSI Status	100	RNA Seq	0.9161	0.9221	0.9214	0.8758	0.9028	0.8972	0.9121	0.8865
LightGBM	SVM	MSI Status	150	Methylation	0.909	0.9209	0.8294	0.793	0.7431	0.7464	0.7863	0.7697
Random Forest	LASSO	MSI Status	150	RNA Seq	0.909	0.9209	0.9217	0.9365	0.8194	0.8349	0.8705	0.8857
Random Forest	LASSO	MSI Status	150	Methylation	0.909	0.9209	0.8363	0.8042	0.7847	0.7945	0.8105	0.79935
GNN	ANOVA F-test	MSI Status	150	RNA Seq	0.9019	0.9196	0.9419	0.9137	0.8056	0.8098	0.8738	0.86175
GNN	LASSO	MSI Status	150	Methylation	0.9315	0.9165	0.8871	0.8181	0.8125	0.806	0.8498	0.81205
LightGBM	ANOVA F-test	MSI Status	20	RNA Seq	0.9315	0.9165	0.9387	0.9387	0.8611	0.8712	0.8999	0.90495
LightGBM	LASSO	MSI Status	10	RNA Seq	0.9244	0.9154	0.9419	0.9137	0.8819	0.8767	0.9119	0.8952
GNN	SVM	MSI Status	150	RNA Seq	0.9244	0.9154	0.894	0.8292	0.8889	0.8703	0.8915	0.84975
GNN	LASSO	MSI Status	20	Methylation	0.9172	0.9143	0.8431	0.8156	0.7847	0.7886	0.8139	0.8021
GNN	SVM	MSI Status	20	RNA Seq	0.9101	0.9131	0.9419	0.9137	0.9236	0.9007	0.9327	0.9072
LightGBM	LASSO	MSI Status	100	Methylation	0.9101	0.9131	0.8294	0.793	0.75	0.7551	0.7897	0.77405
Random Forest	ANOVA F-test	MSI Status	20	RNA Seq	0.9101	0.9131	0.9318	0.9246	0.8403	0.8426	0.8861	0.8836
Random Forest	ANOVA F-test	MSI Status	50	RNA Seq	0.9101	0.9131	0.9387	0.9387	0.8333	0.8403	0.886	0.8895
GNN	SVM	MSI Status	50	Methylation	0.903	0.9117	0.8431	0.8156	0.7569	0.7689	0.8	0.79225
Linear SVM	LASSO	MSI Status	50	RNA Seq	0.903	0.9117	0.9488	0.927	0.8819	0.8767	0.9153	0.90185
Random Forest	LASSO	MSI Status	200	RNA Seq	0.8958	0.9103	0.9455	0.9532	0.8194	0.8349	0.8824	0.89405
Linear SVM	ANOVA F-test	MSI Status	200	RNA Seq	0.8958	0.9103	0.9556	0.9407	0.8333	0.8473	0.8944	0.894
KNN	Random Forest	MSI Status	50	RNA Seq	0.8958	0.9103	0.9387	0.9387	0.7986	0.8068	0.8686	0.87275
KNN	SVM	MSI Status	10	RNA Seq	0.8887	0.9088	0.9455	0.9532	0.8889	0.9026	0.9172	0.9279
Random Forest	SVM	MSI Status	150	Methylation	0.8887	0.9088	0.8125	0.7872	0.7708	0.7764	0.7916	0.7818
Random Forest	ANOVA F-test	MSI Status	150	RNA Seq	0.8887	0.9088	0.9524	0.9682	0.7986	0.8129	0.8755	0.89055
GNN	ANOVA F-test	MSI Status	10	RNA Seq	0.8816	0.9071	0.9318	0.9246	0.8125	0.8255	0.8721	0.87505
Linear SVM	LASSO	MSI Status	10	Methylation	0.9184	0.9066	0.8125	0.7872	0.7083	0.7164	0.7604	0.7518
GNN	LASSO	MSI Status	100	Methylation	0.9184	0.9066	0.9113	0.8849	0.7778	0.7797	0.8446	0.8323
GNN	ANOVA F-test	MSI Status	200	Methylation	0.9184	0.9066	0.7746	0.7105	0.75	0.7391	0.7623	0.7248
GNN	ANOVA F-test	MSI Status	100	RNA Seq	0.9184	0.9066	0.8702	0.8139	0.7847	0.7827	0.8275	0.7983
MLP	SVM	MSI Status	50	Methylation	0.9184	0.9066	0.8532	0.8093	0.7431	0.7512	0.7981	0.78025
MLP	Random Forest	MSI Status	150	Methylation	0.9112	0.9054	0.8532	0.8093	0.7917	0.7977	0.8224	0.8035
MLP	LASSO	MSI Status	100	Methylation	0.9041	0.9041	0.8532	0.8093	0.8125	0.819	0.8328	0.81415
Linear SVM	LASSO	MSI Status	100	RNA Seq	0.9041	0.9041	0.8907	0.8482	0.8125	0.819	0.8516	0.8336
MLP	LASSO	MSI Status	50	Methylation	0.9041	0.9041	0.85	0.8273	0.7847	0.7886	0.8174	0.80795
Linear SVM	ANOVA F-test	MSI Status	20	RNA Seq	0.9041	0.9041	0.9113	0.8849	0.8681	0.8655	0.8897	0.8752
KNN	SVM	MSI Status	20	RNA Seq	0.9041	0.9041	0.9556	0.9407	0.9236	0.9266	0.9396	0.93365
GNN	SVM	MSI Status	10	RNA Seq	0.9041	0.9041	0.9384	0.8789	0.9375	0.9197	0.938	0.8993
MLP	LASSO	MSI Status	10	RNA Seq	0.9041	0.9041	0.9488	0.927	0.9236	0.9092	0.9362	0.9181
LightGBM	ANOVA F-test	MSI Status	50	RNA Seq	0.9041	0.9041	0.9318	0.9246	0.8194	0.8349	0.8756	0.87975
KNN	ANOVA F-test	MSI Status	150	RNA Seq	0.897	0.9027	0.9113	0.8849	0.8194	0.8283	0.8654	0.8566
Linear SVM	Random Forest	MSI Status	50	RNA Seq	0.897	0.9027	0.9351	0.9007	0.8333	0.8403	0.8842	0.8705
Linear SVM	SVM	MSI Status	20	RNA Seq	0.897	0.9027	0.9419	0.9137	0.9375	0.9197	0.9397	0.9167
MLP	Random Forest	MSI Status	200	Methylation	0.897	0.9027	0.8806	0.8561	0.7639	0.7675	0.8223	0.8118
GNN	Random Forest	MSI Status	10	Methylation	0.897	0.9027	0.7714	0.7241	0.7292	0.7191	0.7503	0.7216
GNN	LASSO	MSI Status	50	Methylation	0.897	0.9027	0.8363	0.8042	0.7778	0.7797	0.8071	0.79195
Linear SVM	Random Forest	MSI Status	20	RNA Seq	0.897	0.9027	0.9181	0.8977	0.7847	0.7945	0.8514	0.8461
MLP	Random Forest	MSI Status	100	Methylation	0.897	0.9027	0.8601	0.8206	0.7917	0.7977	0.8259	0.80915
Random Forest	LASSO	MSI Status	100	RNA Seq	0.8898	0.9011	0.9762	0.9844	0.8194	0.8349	0.8978	0.90965
KNN	ANOVA F-test	MSI Status	50	RNA Seq	0.8898	0.9011	0.9387	0.9387	0.8056	0.8161	0.8721	0.8774
Random Forest	Random Forest	MSI Status	20	RNA Seq	0.8898	0.9011	0.9455	0.9532	0.7986	0.8068	0.872	0.88
Random Forest	Random Forest	MSI Status	150	RNA Seq	0.8898	0.9011	0.9524	0.9682	0.7778	0.8018	0.8651	0.885
Random Forest	Random Forest	MSI Status	200	RNA Seq	0.8898	0.9011	0.9387	0.9387	0.7986	0.819	0.8686	0.87885
LightGBM	Random Forest	MSI Status	200	Methylation	0.8898	0.9011	0.8294	0.793	0.7778	0.7797	0.8036	0.78635
MLP	Random Forest	MSI Status	10	RNA Seq	0.8898	0.9011	0.9113	0.8849	0.8125	0.8255	0.8619	0.8552
Linear SVM	LASSO	MSI Status	200	Methylation	0.8898	0.9011	0.8774	0.8774	0.7986	0.8068	0.838	0.8421
KNN	Random Forest	MSI Status	200	RNA Seq	0.8827	0.8995	0.9488	0.927	0.7778	0.7909	0.8633	0.85895
LightGBM	SVM	MSI Status	50	Methylation	0.8827	0.8995	0.8464	0.7982	0.8056	0.8034	0.826	0.8008
Linear SVM	ANOVA F-test	MSI Status	10	RNA Seq	0.9123	0.8979	0.9214	0.8758	0.8819	0.861	0.9017	0.8684
Linear SVM	ANOVA F-test	MSI Status	50	Methylation	0.9123	0.8979	0.8157	0.7713	0.7639	0.7564	0.7898	0.76385
GNN	ANOVA F-test	MSI Status	20	Methylation	0.9123	0.8979	0.7678	0.7008	0.7569	0.7295	0.7624	0.71515
KNN	LASSO	MSI Status	20	RNA Seq	0.8756	0.8977	0.9556	0.9407	0.8472	0.8594	0.9014	0.90005
KNN	LASSO	MSI Status	10	RNA Seq	0.8756	0.8977	0.9217	0.9365	0.8611	0.879	0.8914	0.90775
KNN	ANOVA F-test	MSI Status	20	RNA Seq	0.8756	0.8977	0.9387	0.9387	0.8194	0.8349	0.879	0.8868
GNN	ANOVA F-test	MSI Status	50	Methylation	0.9052	0.8966	0.7746	0.7105	0.8056	0.7904	0.7901	0.75045
MLP	ANOVA F-test	MSI Status	20	Methylation	0.9052	0.8966	0.8053	0.7356	0.7083	0.699	0.7568	0.7173
MLP	LASSO	MSI Status	20	Methylation	0.9052	0.8966	0.8157	0.7713	0.7778	0.7797	0.7968	0.7755
MLP	ANOVA F-test	MSI Status	200	Methylation	0.9052	0.8966	0.7577	0.7044	0.75	0.7333	0.7539	0.71885
MLP	ANOVA F-test	MSI Status	150	Methylation	0.9052	0.8966	0.8565	0.7922	0.7222	0.7106	0.7893	0.7514
GNN	ANOVA F-test	MSI Status	150	Methylation	0.9052	0.8966	0.8053	0.7356	0.75	0.7333	0.7776	0.73445
KNN	Random Forest	MSI Status	10	RNA Seq	0.8684	0.8958	0.908	0.908	0.7847	0.8058	0.8463	0.8569
MLP	SVM	MSI Status	20	Methylation	0.8981	0.8952	0.8637	0.8516	0.7222	0.7295	0.793	0.79055
GNN	SVM	MSI Status	100	Methylation	0.8981	0.8952	0.8056	0.7762	0.6944	0.7029	0.75	0.73955
GNN	Random Forest	MSI Status	100	Methylation	0.8981	0.8952	0.8089	0.7607	0.7639	0.7675	0.7864	0.7641
Linear SVM	SVM	MSI Status	10	RNA Seq	0.8981	0.8952	0.9556	0.9407	0.9236	0.9178	0.9396	0.92925
LightGBM	LASSO	MSI Status	150	Methylation	0.8909	0.8937	0.8839	0.8365	0.7778	0.7797	0.8309	0.8081
GNN	SVM	MSI Status	20	Methylation	0.8909	0.8937	0.8193	0.7985	0.7569	0.7639	0.7881	0.7812
Linear SVM	LASSO	MSI Status	50	Methylation	0.8909	0.8937	0.8294	0.793	0.7917	0.7917	0.8105	0.79235
Random Forest	LASSO	MSI Status	50	Methylation	0.8909	0.8937	0.7919	0.7548	0.8125	0.8125	0.8022	0.78365
MLP	ANOVA F-test	MSI Status	10	Methylation	0.8909	0.8937	0.7782	0.7342	0.7431	0.7361	0.7607	0.73515
GNN	Random Forest	MSI Status	50	Methylation	0.8838	0.8921	0.8056	0.7762	0.7986	0.8007	0.8021	0.78845
KNN	Random Forest	MSI Status	150	RNA Seq	0.8838	0.8921	0.9214	0.8758	0.8194	0.8217	0.8704	0.84875
LightGBM	Random Forest	MSI Status	150	Methylation	0.8838	0.8921	0.8532	0.8093	0.7361	0.7469	0.7946	0.7781
Random Forest	SVM	MSI Status	100	Methylation	0.8838	0.8921	0.8157	0.7713	0.7847	0.7827	0.8002	0.777
Random Forest	ANOVA F-test	MSI Status	10	RNA Seq	0.8838	0.8921	0.9318	0.9246	0.8333	0.8403	0.8825	0.88245
KNN	ANOVA F-test	MSI Status	100	RNA Seq	0.8838	0.8921	0.9113	0.8849	0.8056	0.8161	0.8584	0.8505
MLP	Random Forest	MSI Status	20	Methylation	0.9134	0.8906	0.7815	0.7202	0.75	0.7273	0.7657	0.72375
LightGBM	SVM	MSI Status	100	Methylation	0.8767	0.8904	0.877	0.8251	0.7917	0.7977	0.8343	0.8114
KNN	Random Forest	MSI Status	20	RNA Seq	0.8767	0.8904	0.9318	0.9246	0.8194	0.8283	0.8756	0.87645
GNN	SVM	MSI Status	50	miRNA	0.8767	0.8904	0.7648	0.7517	0.6736	0.6809	0.7192	0.7163
KNN	LASSO	MSI Status	150	RNA Seq	0.8767	0.8904	0.9488	0.927	0.7986	0.8007	0.8737	0.86385
Linear SVM	Random Forest	MSI Status	100	RNA Seq	0.8767	0.8904	0.9351	0.9007	0.8056	0.8224	0.8703	0.86155
GNN	LASSO	MSI Status	10	Methylation	0.9063	0.8893	0.8363	0.8042	0.7222	0.7252	0.7792	0.7647
MLP	LASSO	MSI Status	10	Methylation	0.9063	0.8893	0.7988	0.7654	0.75	0.75	0.7744	0.7577
Random Forest	Random Forest	MSI Status	200	Methylation	0.8695	0.8885	0.7818	0.7589	0.6944	0.7085	0.7381	0.7337
GNN	Random Forest	MSI Status	20	Methylation	0.8992	0.888	0.7815	0.7202	0.7778	0.7618	0.7796	0.741
GNN	Random Forest	MSI Status	200	Methylation	0.8992	0.888	0.7952	0.7402	0.7361	0.7328	0.7656	0.7365
MLP	ANOVA F-test	MSI Status	50	Methylation	0.8992	0.888	0.8327	0.7767	0.7153	0.7074	0.774	0.74205
LightGBM	SVM	MSI Status	20	Methylation	0.892	0.8865	0.8565	0.7922	0.7639	0.7675	0.8102	0.77985
GNN	Random Forest	MSI Status	150	Methylation	0.892	0.8865	0.8327	0.7767	0.7222	0.7158	0.7774	0.74625
LightGBM	ANOVA F-test	MSI Status	100	Methylation	0.8849	0.8849	0.8363	0.8042	0.7222	0.7207	0.7792	0.76245
Random Forest	LASSO	MSI Status	20	Methylation	0.8849	0.8849	0.802	0.7504	0.7917	0.7855	0.7969	0.76795
KNN	ANOVA F-test	MSI Status	200	RNA Seq	0.8849	0.8849	0.9113	0.8849	0.8125	0.819	0.8619	0.85195
GNN	Random Forest	MSI Status	10	RNA Seq	0.8553	0.8843	0.908	0.908	0.7847	0.8058	0.8463	0.8569
KNN	SVM	MSI Status	50	RNA Seq	0.8553	0.8843	0.9012	0.8945	0.7431	0.7558	0.8221	0.82515
MLP	Random Forest	MSI Status	50	Methylation	0.8778	0.8832	0.8669	0.8321	0.7847	0.7767	0.8258	0.8044
LightGBM	ANOVA F-test	MSI Status	100	RNA Seq	0.8778	0.8832	0.9387	0.9387	0.7778	0.8018	0.8582	0.87025
LightGBM	LASSO	MSI Status	50	Methylation	0.8778	0.8832	0.8633	0.8029	0.7778	0.7797	0.8206	0.7913
Linear SVM	Random Forest	MSI Status	150	RNA Seq	0.8706	0.8814	0.9214	0.8758	0.8194	0.8349	0.8704	0.85535
Linear SVM	ANOVA F-test	MSI Status	100	RNA Seq	0.8706	0.8814	0.9282	0.8881	0.8403	0.8498	0.8842	0.86895
Random Forest	LASSO	MSI Status	100	Methylation	0.8706	0.8814	0.8294	0.793	0.75	0.75	0.7897	0.7715
LightGBM	ANOVA F-test	MSI Status	200	Methylation	0.8706	0.8814	0.8089	0.7607	0.7431	0.7464	0.776	0.75355
Linear SVM	ANOVA F-test	MSI Status	150	RNA Seq	0.8706	0.8814	0.9282	0.8881	0.8264	0.8377	0.8773	0.8629
Linear SVM	SVM	MSI Status	100	Methylation	0.8706	0.8814	0.8568	0.8393	0.7708	0.7818	0.8138	0.81055
MLP	Random Forest	MSI Status	10	Methylation	0.8932	0.8794	0.7815	0.7202	0.7361	0.7163	0.7588	0.71825
Random Forest	Random Forest	MSI Status	10	RNA Seq	0.8635	0.8794	0.9455	0.9532	0.7847	0.7945	0.8651	0.87385
KNN	SVM	MSI Status	100	RNA Seq	0.8635	0.8794	0.9012	0.8945	0.7778	0.7909	0.8395	0.8427
Linear SVM	ANOVA F-test	MSI Status	20	Methylation	0.886	0.8778	0.802	0.7504	0.7569	0.7477	0.7794	0.74905
Linear SVM	Random Forest	MSI Status	100	Methylation	0.886	0.8778	0.8601	0.8206	0.7778	0.7797	0.819	0.80015
KNN	ANOVA F-test	MSI Status	10	RNA Seq	0.8564	0.8773	0.9387	0.9387	0.8264	0.8377	0.8825	0.8882
GNN	ANOVA F-test	MSI Status	100	miRNA	0.8564	0.8773	0.7342	0.7225	0.7014	0.7079	0.7178	0.7152
Random Forest	SVM	MSI Status	200	Methylation	0.8564	0.8773	0.85	0.8273	0.7014	0.7113	0.7757	0.7693
Linear SVM	ANOVA F-test	MSI Status	100	Methylation	0.8789	0.8762	0.8157	0.7713	0.7639	0.762	0.7898	0.76665
KNN	ANOVA F-test	MSI Status	200	Methylation	0.8789	0.8762	0.758	0.741	0.6944	0.6995	0.7262	0.72025
Linear SVM	Random Forest	MSI Status	10	RNA Seq	0.8492	0.875	0.9524	0.9682	0.7708	0.7923	0.8616	0.88025
KNN	LASSO	MSI Status	50	RNA Seq	0.8492	0.875	0.9556	0.9407	0.8125	0.819	0.8841	0.87985
LightGBM	Random Forest	MSI Status	50	Methylation	0.8718	0.8744	0.8464	0.7982	0.7569	0.7587	0.8016	0.77845
Linear SVM	ANOVA F-test	MSI Status	200	Methylation	0.8646	0.8725	0.7988	0.7654	0.7431	0.7512	0.771	0.7583
KNN	Random Forest	MSI Status	20	Methylation	0.8646	0.8725	0.7851	0.7444	0.75	0.7447	0.7675	0.74455
LightGBM	ANOVA F-test	MSI Status	150	Methylation	0.8646	0.8725	0.802	0.7504	0.7292	0.7243	0.7656	0.73735
KNN	LASSO	MSI Status	100	RNA Seq	0.8421	0.8725	0.9488	0.927	0.8264	0.8377	0.8876	0.88235
Random Forest	SVM	MSI Status	20	Methylation	0.8646	0.8725	0.85	0.8273	0.7292	0.7423	0.7896	0.7848
LightGBM	LASSO	MSI Status	200	Methylation	0.8646	0.8725	0.8839	0.8365	0.7708	0.7818	0.8274	0.80915
MLP	SVM	MSI Status	10	Methylation	0.8943	0.8724	0.8157	0.7713	0.7431	0.7464	0.7794	0.75885
Random Forest	SVM	MSI Status	10	Methylation	0.8871	0.8709	0.7851	0.7444	0.7361	0.7377	0.7606	0.74105
Linear SVM	Random Forest	MSI Status	20	Methylation	0.8871	0.8709	0.8089	0.7607	0.7778	0.7618	0.7933	0.76125
LightGBM	LASSO	MSI Status	10	Methylation	0.8871	0.8709	0.802	0.7504	0.7431	0.7361	0.7726	0.74325
LightGBM	Random Forest	MSI Status	100	Methylation	0.8575	0.8704	0.8532	0.8093	0.7431	0.7512	0.7981	0.78025
Linear SVM	SVM	MSI Status	50	Methylation	0.8575	0.8704	0.8669	0.8321	0.7778	0.7909	0.8224	0.8115
Linear SVM	LASSO	MSI Status	20	Methylation	0.88	0.8693	0.8226	0.782	0.7917	0.7977	0.8072	0.78985
GNN	ANOVA F-test	MSI Status	100	Methylation	0.88	0.8693	0.8291	0.7507	0.7361	0.7163	0.7826	0.7335
Linear SVM	Random Forest	MSI Status	200	Methylation	0.8503	0.8682	0.8705	0.8643	0.7639	0.778	0.8172	0.82115
KNN	SVM	MSI Status	150	RNA Seq	0.8503	0.8682	0.9658	0.9291	0.7986	0.8129	0.8822	0.871
KNN	Random Forest	MSI Status	100	RNA Seq	0.8503	0.8682	0.8976	0.8601	0.8125	0.819	0.855	0.83955
Random Forest	ANOVA F-test	MSI Status	150	Methylation	0.8503	0.8682	0.8125	0.7872	0.6944	0.6995	0.7534	0.74335
Random Forest	SVM	MSI Status	50	Methylation	0.8432	0.8658	0.8157	0.7713	0.7639	0.7675	0.7898	0.7694
GNN	SVM	MSI Status	150	miRNA	0.8432	0.8658	0.8226	0.782	0.6667	0.6751	0.7447	0.72855
Linear SVM	SVM	MSI Status	20	Methylation	0.8657	0.8657	0.8294	0.793	0.7431	0.7558	0.7863	0.7744
KNN	ANOVA F-test	MSI Status	150	Methylation	0.8657	0.8657	0.8125	0.7872	0.7222	0.7252	0.7673	0.7562
Linear SVM	ANOVA F-test	MSI Status	10	Methylation	0.8657	0.8657	0.802	0.7504	0.7361	0.7221	0.7691	0.73625
LightGBM	ANOVA F-test	MSI Status	20	Methylation	0.8586	0.8637	0.8226	0.782	0.7014	0.7	0.762	0.741
GNN	SVM	MSI Status	100	miRNA	0.8515	0.8616	0.7782	0.7342	0.6597	0.6687	0.7189	0.70145
MLP	LASSO	MSI Status	200	miRNA	0.8515	0.8616	0.8907	0.8482	0.6736	0.6781	0.7822	0.76315
LightGBM	ANOVA F-test	MSI Status	10	RNA Seq	0.874	0.8608	0.9181	0.8977	0.8403	0.8426	0.8792	0.87015
KNN	Random Forest	MSI Status	10	Methylation	0.8443	0.8593	0.7919	0.7548	0.7222	0.7207	0.7571	0.73775
Random Forest	ANOVA F-test	MSI Status	200	Methylation	0.8443	0.8593	0.7988	0.7654	0.7292	0.7338	0.764	0.7496
Linear SVM	Random Forest	MSI Status	150	Methylation	0.8443	0.8593	0.8399	0.8342	0.7361	0.7469	0.788	0.79055
KNN	Random Forest	MSI Status	100	Methylation	0.8443	0.8593	0.8023	0.7923	0.7431	0.7512	0.7727	0.77175
KNN	LASSO	MSI Status	200	RNA Seq	0.8443	0.8593	0.9387	0.9387	0.7847	0.8002	0.8617	0.86945
MLP	ANOVA F-test	MSI Status	100	Methylation	0.8668	0.8591	0.7815	0.7202	0.7292	0.7078	0.7553	0.714
LightGBM	Random Forest	MSI Status	20	Methylation	0.8597	0.8571	0.8294	0.793	0.7361	0.7328	0.7828	0.7629
Random Forest	Random Forest	MSI Status	150	Methylation	0.8372	0.8568	0.8056	0.7762	0.7292	0.7338	0.7674	0.755
Linear SVM	Random Forest	MSI Status	50	Methylation	0.8526	0.8551	0.8806	0.8561	0.7569	0.7689	0.8188	0.8125
KNN	Random Forest	MSI Status	50	Methylation	0.8526	0.8551	0.8226	0.782	0.7431	0.7512	0.7829	0.7666
Random Forest	Random Forest	MSI Status	50	Methylation	0.8301	0.8542	0.8262	0.8101	0.7014	0.7172	0.7638	0.76365
MLP	SVM	MSI Status	100	miRNA	0.8454	0.8529	0.8363	0.8042	0.6875	0.6945	0.7619	0.74935
MLP	ANOVA F-test	MSI Status	100	miRNA	0.8454	0.8529	0.7169	0.681	0.6944	0.6995	0.7056	0.69025
Linear SVM	ANOVA F-test	MSI Status	150	Methylation	0.8454	0.8529	0.8262	0.8101	0.7292	0.7382	0.7777	0.77415
KNN	LASSO	MSI Status	10	Methylation	0.8454	0.8529	0.7515	0.7691	0.6806	0.6916	0.716	0.73035
Linear SVM	Random Forest	MSI Status	10	Methylation	0.8454	0.8529	0.7782	0.7342	0.7361	0.7221	0.7571	0.72815
LightGBM	SVM	MSI Status	10	Methylation	0.8679	0.8524	0.8294	0.793	0.7569	0.7587	0.7932	0.77585
KNN	Random Forest	MSI Status	150	Methylation	0.8229	0.8513	0.7547	0.7547	0.7431	0.7601	0.7489	0.7574
Linear SVM	SVM	MSI Status	150	miRNA	0.8383	0.8505	0.775	0.7482	0.7153	0.7249	0.7451	0.73655
Random Forest	Random Forest	MSI Status	100	Methylation	0.8383	0.8505	0.8294	0.793	0.7153	0.7168	0.7724	0.7549
LightGBM	Random Forest	MSI Status	10	RNA Seq	0.8383	0.8505	0.9318	0.9246	0.8264	0.8309	0.8791	0.87775
Random Forest	Random Forest	MSI Status	20	Methylation	0.8383	0.8505	0.7988	0.7654	0.7222	0.7252	0.7605	0.7453
MLP	Random Forest	MSI Status	100	miRNA	0.8537	0.8487	0.8121	0.7457	0.7431	0.7361	0.7776	0.7409
MLP	SVM	MSI Status	50	miRNA	0.8537	0.8487	0.7988	0.7654	0.7361	0.7424	0.7674	0.7539
KNN	LASSO	MSI Status	50	Methylation	0.824	0.8452	0.8399	0.8342	0.7639	0.778	0.8019	0.8061
KNN	SVM	MSI Status	200	RNA Seq	0.824	0.8452	0.8943	0.8813	0.7847	0.8002	0.8395	0.84075
Random Forest	LASSO	MSI Status	200	Methylation	0.824	0.8452	0.8262	0.8101	0.6944	0.7059	0.7603	0.758
Random Forest	Random Forest	MSI Status	10	Methylation	0.8394	0.8443	0.7681	0.7378	0.7014	0.7	0.7348	0.7189
MLP	LASSO	MSI Status	150	miRNA	0.8323	0.8418	0.8327	0.7767	0.7222	0.7252	0.7774	0.75095
LightGBM	ANOVA F-test	MSI Status	50	Methylation	0.8323	0.8418	0.8363	0.8042	0.7361	0.7328	0.7862	0.7685
LightGBM	LASSO	MSI Status	20	Methylation	0.8477	0.8403	0.819	0.7558	0.7778	0.7797	0.7984	0.76775
KNN	ANOVA F-test	MSI Status	10	Methylation	0.8251	0.8392	0.7818	0.7589	0.7222	0.7252	0.752	0.74205
GNN	SVM	MSI Status	10	Methylation	0.8251	0.8392	0.8059	0.8221	0.6597	0.6669	0.7328	0.7445
MLP	SVM	MSI Status	20	miRNA	0.8405	0.8381	0.6794	0.6453	0.5903	0.5909	0.6349	0.6181
Random Forest	LASSO	MSI Status	10	Methylation	0.8559	0.8359	0.7645	0.7142	0.7292	0.7243	0.7469	0.71925
Linear SVM	SVM	MSI Status	100	miRNA	0.8334	0.8358	0.7613	0.7275	0.6458	0.6527	0.7036	0.6901
MLP	SVM	MSI Status	200	miRNA	0.8334	0.8358	0.8258	0.7662	0.7361	0.7328	0.781	0.7495
GNN	LASSO	MSI Status	150	miRNA	0.8109	0.8333	0.8395	0.7873	0.6181	0.6225	0.7288	0.7049
Random Forest	ANOVA F-test	MSI Status	10	Methylation	0.8109	0.8333	0.7886	0.7697	0.7153	0.721	0.752	0.74535
KNN	Random Forest	MSI Status	150	miRNA	0.8109	0.8333	0.7342	0.7225	0.6875	0.6975	0.7108	0.71
MLP	Random Forest	MSI Status	200	miRNA	0.8191	0.8306	0.8262	0.8101	0.7847	0.7767	0.8054	0.7934
KNN	Random Forest	MSI Status	200	Methylation	0.8037	0.8301	0.7854	0.7854	0.6875	0.7	0.7365	0.7427
GNN	ANOVA F-test	MSI Status	150	miRNA	0.812	0.8277	0.7851	0.7444	0.75	0.75	0.7675	0.7472
Random Forest	ANOVA F-test	MSI Status	100	Methylation	0.812	0.8277	0.7988	0.7654	0.6944	0.6995	0.7466	0.73245
Random Forest	ANOVA F-test	MSI Status	50	Methylation	0.812	0.8277	0.7988	0.7654	0.7292	0.7292	0.764	0.7473
MLP	ANOVA F-test	MSI Status	200	miRNA	0.8274	0.8274	0.7883	0.7301	0.7153	0.7122	0.7518	0.72115
KNN	SVM	MSI Status	20	Methylation	0.7966	0.8265	0.7414	0.7718	0.6875	0.7037	0.7145	0.73775
Linear SVM	SVM	MSI Status	10	Methylation	0.8427	0.8258	0.819	0.7558	0.7639	0.762	0.7914	0.7589
GNN	Random Forest	MSI Status	50	miRNA	0.8202	0.8248	0.6898	0.6738	0.6875	0.6875	0.6886	0.68065
GNN	Random Forest	MSI Status	200	miRNA	0.8202	0.8248	0.7273	0.7122	0.7361	0.7469	0.7317	0.72955
GNN	SVM	MSI Status	20	miRNA	0.8202	0.8248	0.7205	0.7021	0.5764	0.5774	0.6484	0.63975
MLP	SVM	MSI Status	150	miRNA	0.8049	0.8246	0.7886	0.7697	0.6389	0.6407	0.7137	0.7052
KNN	SVM	MSI Status	200	Methylation	0.8049	0.8246	0.7955	0.7809	0.7153	0.7285	0.7554	0.7547
Random Forest	ANOVA F-test	MSI Status	20	Methylation	0.8049	0.8246	0.7818	0.7589	0.6736	0.6748	0.7277	0.71685
GNN	SVM	MSI Status	200	miRNA	0.8049	0.8246	0.8532	0.8093	0.6667	0.6727	0.7599	0.741
Linear SVM	Random Forest	MSI Status	100	miRNA	0.8356	0.8237	0.8464	0.7982	0.7014	0.7041	0.7739	0.75115
KNN	ANOVA F-test	MSI Status	50	Methylation	0.8131	0.8221	0.8193	0.7985	0.7153	0.721	0.7673	0.75975
MLP	LASSO	MSI Status	100	miRNA	0.8131	0.8221	0.7919	0.7548	0.6806	0.6863	0.7363	0.72055
MLP	ANOVA F-test	MSI Status	150	miRNA	0.8285	0.8215	0.8157	0.7713	0.7083	0.699	0.762	0.73515
GNN	LASSO	MSI Status	200	miRNA	0.7977	0.8212	0.775	0.7482	0.6736	0.6781	0.7243	0.71315
GNN	ANOVA F-test	MSI Status	50	miRNA	0.806	0.8191	0.697	0.714	0.625	0.6278	0.661	0.6709
GNN	Random Forest	MSI Status	150	miRNA	0.806	0.8191	0.8262	0.8101	0.7292	0.7382	0.7777	0.77415
GNN	Random Forest	MSI Status	100	miRNA	0.8213	0.819	0.7782	0.7342	0.6736	0.6711	0.7259	0.70265
Linear SVM	SVM	MSI Status	50	miRNA	0.8213	0.819	0.7306	0.7003	0.7014	0.7041	0.716	0.7022
GNN	ANOVA F-test	MSI Status	200	miRNA	0.8213	0.819	0.8565	0.7922	0.7292	0.7191	0.7929	0.75565
MLP	Random Forest	MSI Status	20	miRNA	0.8367	0.8177	0.7511	0.7305	0.7153	0.721	0.7332	0.72575
MLP	Random Forest	MSI Status	50	miRNA	0.8142	0.8164	0.6797	0.6736	0.6944	0.7029	0.687	0.68825
LightGBM	ANOVA F-test	MSI Status	10	Methylation	0.7988	0.8159	0.7205	0.7021	0.75	0.7447	0.7352	0.7234
KNN	ANOVA F-test	MSI Status	100	Methylation	0.7988	0.8159	0.7854	0.7854	0.6875	0.7	0.7365	0.7427
KNN	ANOVA F-test	MSI Status	20	Methylation	0.7988	0.8159	0.7988	0.7654	0.7292	0.7338	0.764	0.7496
Linear SVM	LASSO	MSI Status	50	miRNA	0.8071	0.8136	0.7613	0.7275	0.7292	0.7382	0.7452	0.73285
LightGBM	Random Forest	MSI Status	10	Methylation	0.8071	0.8136	0.7919	0.7548	0.7153	0.7122	0.7536	0.7335
MLP	Random Forest	MSI Status	150	miRNA	0.8071	0.8136	0.7714	0.7241	0.75	0.7551	0.7607	0.7396
Linear SVM	Random Forest	MSI Status	150	miRNA	0.8307	0.8096	0.8633	0.8029	0.7361	0.7276	0.7997	0.76525
KNN	LASSO	MSI Status	100	Methylation	0.7846	0.8088	0.7955	0.7809	0.7222	0.7336	0.7589	0.75725
KNN	LASSO	MSI Status	150	Methylation	0.7846	0.8088	0.833	0.822	0.7292	0.7423	0.7811	0.78215
Random Forest	ANOVA F-test	MSI Status	200	miRNA	0.7928	0.8074	0.7208	0.7361	0.625	0.6306	0.6729	0.68335
Linear SVM	LASSO	MSI Status	150	miRNA	0.7928	0.8074	0.8226	0.782	0.6528	0.6589	0.7377	0.72045
Linear SVM	SVM	MSI Status	200	miRNA	0.7928	0.8074	0.8125	0.7872	0.6736	0.6781	0.743	0.73265
KNN	SVM	MSI Status	10	Methylation	0.7857	0.8039	0.7616	0.7661	0.7014	0.7144	0.7315	0.74025
Linear SVM	LASSO	MSI Status	200	miRNA	0.7857	0.8039	0.7511	0.7305	0.7014	0.7079	0.7263	0.7192
Random Forest	LASSO	MSI Status	200	miRNA	0.8093	0.8027	0.8294	0.793	0.7153	0.7249	0.7724	0.75895
Linear SVM	LASSO	MSI Status	100	miRNA	0.7939	0.8023	0.7988	0.7654	0.6458	0.6509	0.7223	0.70815
KNN	LASSO	MSI Status	20	Methylation	0.7939	0.8023	0.7753	0.7897	0.7153	0.7249	0.7453	0.7573
KNN	SVM	MSI Status	100	Methylation	0.7703	0.8005	0.8092	0.804	0.7431	0.7601	0.7762	0.78205
LightGBM	Random Forest	MSI Status	150	miRNA	0.7785	0.8002	0.7547	0.7547	0.7014	0.7172	0.7281	0.73595
LightGBM	ANOVA F-test	MSI Status	100	miRNA	0.7868	0.799	0.7753	0.7897	0.5764	0.5731	0.6759	0.6814
GNN	LASSO	MSI Status	100	miRNA	0.795	0.7971	0.7648	0.7517	0.6528	0.6589	0.7088	0.7053
GNN	LASSO	MSI Status	10	miRNA	0.8104	0.7971	0.6928	0.6328	0.5903	0.5922	0.6416	0.6125
MLP	LASSO	MSI Status	50	miRNA	0.795	0.7971	0.7443	0.7202	0.7083	0.7083	0.7263	0.71425
Linear SVM	ANOVA F-test	MSI Status	100	miRNA	0.8104	0.7971	0.7988	0.7654	0.6806	0.683	0.7397	0.7242
Linear SVM	Random Forest	MSI Status	200	miRNA	0.8033	0.7946	0.8464	0.7982	0.7708	0.7708	0.8086	0.7845
Random Forest	Random Forest	MSI Status	100	miRNA	0.8033	0.7946	0.8023	0.7923	0.625	0.6308	0.7137	0.71155
GNN	LASSO	MSI Status	50	miRNA	0.7879	0.794	0.7306	0.7003	0.75	0.75	0.7403	0.72515
MLP	ANOVA F-test	MSI Status	50	miRNA	0.7961	0.7919	0.7645	0.7142	0.7431	0.7414	0.7538	0.7278
GNN	Random Forest	MSI Status	20	miRNA	0.7961	0.7919	0.7237	0.6906	0.6736	0.6781	0.6986	0.68435
KNN	LASSO	MSI Status	200	Methylation	0.7643	0.7918	0.8229	0.8284	0.7361	0.7552	0.7795	0.7918
MLP	LASSO	MSI Status	20	miRNA	0.7808	0.7907	0.7818	0.7589	0.625	0.6308	0.7034	0.69485
KNN	Random Forest	MSI Status	20	miRNA	0.7665	0.7833	0.7172	0.7136	0.6458	0.6544	0.6815	0.684
KNN	SVM	MSI Status	150	Methylation	0.7582	0.7832	0.816	0.816	0.7014	0.7172	0.7587	0.7666
Linear SVM	Random Forest	MSI Status	20	miRNA	0.7984	0.7812	0.7988	0.7654	0.6944	0.7029	0.7466	0.73415
GNN	LASSO	MSI Status	20	miRNA	0.783	0.781	0.8327	0.7767	0.6389	0.643	0.7358	0.70985
LightGBM	ANOVA F-test	MSI Status	150	miRNA	0.7676	0.7789	0.7515	0.7691	0.6458	0.6538	0.6986	0.71145
Linear SVM	ANOVA F-test	MSI Status	200	miRNA	0.7676	0.7789	0.8056	0.7762	0.7014	0.7041	0.7535	0.74015
Linear SVM	SVM	MSI Status	20	miRNA	0.7912	0.7787	0.6862	0.6544	0.6458	0.6458	0.666	0.6501
Random Forest	SVM	MSI Status	50	miRNA	0.7687	0.7744	0.7273	0.7122	0.6528	0.6566	0.6901	0.6844
Linear SVM	Random Forest	MSI Status	50	miRNA	0.7923	0.7733	0.8363	0.8042	0.75	0.7551	0.7932	0.77965
Random Forest	ANOVA F-test	MSI Status	100	miRNA	0.7616	0.7708	0.7378	0.7459	0.625	0.6296	0.6814	0.68775
Random Forest	Random Forest	MSI Status	150	miRNA	0.7781	0.768	0.7886	0.7697	0.6667	0.6751	0.7276	0.7224
Linear SVM	ANOVA F-test	MSI Status	150	miRNA	0.7462	0.7663	0.7648	0.7517	0.6389	0.6464	0.7019	0.69905
GNN	ANOVA F-test	MSI Status	20	miRNA	0.7863	0.7655	0.6624	0.6368	0.6528	0.638	0.6576	0.6374
KNN	Random Forest	MSI Status	200	miRNA	0.738	0.7647	0.7511	0.7305	0.7222	0.7336	0.7367	0.73205
LightGBM	SVM	MSI Status	200	miRNA	0.7555	0.7627	0.7717	0.7626	0.6528	0.6607	0.7123	0.71165
LightGBM	ANOVA F-test	MSI Status	50	miRNA	0.7555	0.7627	0.7068	0.6826	0.7431	0.7512	0.7249	0.7169
LightGBM	Random Forest	MSI Status	100	miRNA	0.7473	0.7626	0.7515	0.7691	0.625	0.6296	0.6883	0.69935
Random Forest	Random Forest	MSI Status	50	miRNA	0.7391	0.7615	0.7208	0.7361	0.6806	0.6951	0.7007	0.7156
KNN	Random Forest	MSI Status	100	miRNA	0.7391	0.7615	0.714	0.725	0.7083	0.7231	0.7111	0.72405
KNN	LASSO	MSI Status	200	miRNA	0.7391	0.7615	0.7306	0.7003	0.6736	0.6748	0.7021	0.68755
MLP	LASSO	MSI Status	10	miRNA	0.772	0.7602	0.7202	0.6694	0.6111	0.6094	0.6656	0.6394
Random Forest	SVM	MSI Status	200	miRNA	0.7567	0.7585	0.741	0.733	0.7014	0.7113	0.7212	0.72215
LightGBM	Random Forest	MSI Status	200	miRNA	0.7567	0.7585	0.7104	0.7033	0.6736	0.6852	0.692	0.69425
Random Forest	Random Forest	MSI Status	20	miRNA	0.7649	0.7573	0.7172	0.7136	0.6667	0.6727	0.6919	0.69315
GNN	Random Forest	MSI Status	10	miRNA	0.7649	0.7573	0.7479	0.7437	0.6597	0.6687	0.7038	0.7062
LightGBM	LASSO	MSI Status	150	miRNA	0.7495	0.7548	0.7955	0.7809	0.6806	0.683	0.738	0.73195
LightGBM	SVM	MSI Status	20	miRNA	0.7495	0.7548	0.7068	0.6826	0.6389	0.643	0.6728	0.6628
Random Forest	LASSO	MSI Status	50	miRNA	0.7495	0.7548	0.7003	0.7037	0.6806	0.6891	0.6905	0.6964
MLP	ANOVA F-test	MSI Status	20	miRNA	0.7578	0.7541	0.7681	0.7378	0.7083	0.7083	0.7382	0.72305
Random Forest	SVM	MSI Status	20	miRNA	0.7424	0.7508	0.6967	0.6834	0.6111	0.6119	0.6539	0.64765
LightGBM	LASSO	MSI Status	20	miRNA	0.7506	0.7506	0.7306	0.7003	0.6181	0.6231	0.6744	0.6617
KNN	ANOVA F-test	MSI Status	50	miRNA	0.7341	0.75	0.714	0.725	0.6736	0.6852	0.6938	0.7051
Linear SVM	ANOVA F-test	MSI Status	50	miRNA	0.7743	0.75	0.7746	0.7105	0.7361	0.7328	0.7553	0.72165
KNN	Random Forest	MSI Status	50	miRNA	0.7259	0.7479	0.7616	0.7661	0.7222	0.7373	0.7419	0.7517
Random Forest	ANOVA F-test	MSI Status	150	miRNA	0.76	0.7447	0.7378	0.7459	0.6736	0.6809	0.7057	0.7134
GNN	ANOVA F-test	MSI Status	10	miRNA	0.76	0.7447	0.8157	0.7713	0.6597	0.6646	0.7377	0.71795
GNN	SVM	MSI Status	10	miRNA	0.7446	0.7429	0.6386	0.6186	0.5972	0.594	0.6179	0.6063
Random Forest	LASSO	MSI Status	20	miRNA	0.7281	0.742	0.6491	0.6439	0.5556	0.5522	0.6023	0.59805
KNN	Random Forest	MSI Status	10	miRNA	0.7529	0.7418	0.6628	0.6628	0.7083	0.7164	0.6855	0.6896
MLP	Random Forest	MSI Status	10	miRNA	0.7611	0.7398	0.7371	0.6759	0.7569	0.7587	0.747	0.7173
LightGBM	SVM	MSI Status	150	miRNA	0.7292	0.7387	0.741	0.733	0.7153	0.7249	0.7282	0.72895
Linear SVM	LASSO	MSI Status	20	miRNA	0.7457	0.7386	0.8428	0.7711	0.6319	0.6351	0.7373	0.7031
LightGBM	SVM	MSI Status	100	miRNA	0.721	0.7371	0.7547	0.7547	0.6736	0.6852	0.7142	0.71995
LightGBM	LASSO	MSI Status	200	miRNA	0.7303	0.7352	0.741	0.733	0.7222	0.7373	0.7316	0.73515
Random Forest	SVM	MSI Status	100	miRNA	0.7386	0.7351	0.7443	0.7202	0.6528	0.6589	0.6986	0.68955
KNN	SVM	MSI Status	150	miRNA	0.7139	0.7318	0.6967	0.6834	0.625	0.6291	0.6608	0.65625
MLP	ANOVA F-test	MSI Status	10	miRNA	0.7479	0.7294	0.727	0.6787	0.6458	0.6388	0.6864	0.65875
KNN	LASSO	MSI Status	100	miRNA	0.715	0.7292	0.7205	0.7021	0.6319	0.63	0.6762	0.66605
Random Forest	SVM	MSI Status	150	miRNA	0.7243	0.7275	0.7785	0.7739	0.6667	0.6751	0.7226	0.7245
KNN	SVM	MSI Status	50	Methylation	0.7067	0.726	0.789	0.8149	0.7222	0.7336	0.7556	0.77425
LightGBM	Random Forest	MSI Status	50	miRNA	0.7172	0.7232	0.7374	0.7102	0.6458	0.6527	0.6916	0.68145
KNN	LASSO	MSI Status	10	miRNA	0.7007	0.7181	0.6866	0.6834	0.5903	0.5922	0.6384	0.6378
Random Forest	LASSO	MSI Status	100	miRNA	0.7194	0.7162	0.7955	0.7809	0.7222	0.7295	0.7589	0.7552
LightGBM	Random Forest	MSI Status	20	miRNA	0.7194	0.7162	0.7717	0.7626	0.6806	0.6916	0.7262	0.7271
KNN	LASSO	MSI Status	20	miRNA	0.7018	0.716	0.7273	0.7122	0.5903	0.5928	0.6588	0.6525
LightGBM	ANOVA F-test	MSI Status	200	miRNA	0.7018	0.716	0.7547	0.7547	0.6319	0.6386	0.6933	0.69665
LightGBM	LASSO	MSI Status	50	miRNA	0.7112	0.7156	0.6083	0.6101	0.6875	0.7	0.6479	0.65505
Random Forest	SVM	MSI Status	10	miRNA	0.7205	0.7124	0.6559	0.6532	0.5903	0.5922	0.6231	0.6227
KNN	ANOVA F-test	MSI Status	100	miRNA	0.6947	0.7103	0.7241	0.7241	0.7292	0.7423	0.7267	0.7332
LightGBM	LASSO	MSI Status	100	miRNA	0.7051	0.708	0.7104	0.7033	0.7083	0.7125	0.7094	0.7079
KNN	ANOVA F-test	MSI Status	150	miRNA	0.6853	0.7059	0.7753	0.7897	0.6319	0.638	0.7036	0.71385
KNN	SVM	MSI Status	200	miRNA	0.7145	0.7049	0.7065	0.6509	0.6111	0.6094	0.6588	0.63015
KNN	ANOVA F-test	MSI Status	20	miRNA	0.6875	0.7041	0.6288	0.6372	0.6458	0.6544	0.6373	0.6458
Linear SVM	LASSO	MSI Status	10	miRNA	0.7074	0.7012	0.7234	0.6573	0.625	0.625	0.6742	0.64115
MLP	SVM	MSI Status	10	miRNA	0.6991	0.7005	0.6181	0.5927	0.6458	0.6426	0.632	0.61765
KNN	SVM	MSI Status	100	miRNA	0.6793	0.698	0.8023	0.7923	0.6806	0.6936	0.7414	0.74295
Random Forest	Random Forest	MSI Status	200	miRNA	0.7002	0.6973	0.7547	0.7547	0.6181	0.6219	0.6864	0.6883
Random Forest	ANOVA F-test	MSI Status	50	miRNA	0.7167	0.6964	0.775	0.7482	0.6458	0.6458	0.7104	0.697
Linear SVM	Random Forest	MSI Status	10	miRNA	0.725	0.6944	0.7577	0.7044	0.7639	0.762	0.7608	0.7332
Random Forest	ANOVA F-test	MSI Status	20	miRNA	0.7013	0.6938	0.7717	0.7626	0.75	0.7647	0.7609	0.76365
Random Forest	LASSO	MSI Status	150	miRNA	0.7096	0.6934	0.8157	0.7713	0.6806	0.6793	0.7481	0.7253
KNN	SVM	MSI Status	50	miRNA	0.6931	0.6931	0.7883	0.7301	0.6528	0.6506	0.7206	0.69035
KNN	ANOVA F-test	MSI Status	10	miRNA	0.6848	0.691	0.714	0.725	0.625	0.6308	0.6695	0.6779
LightGBM	LASSO	MSI Status	10	miRNA	0.7024	0.69	0.7032	0.6622	0.5833	0.5855	0.6433	0.62385
KNN	ANOVA F-test	MSI Status	200	miRNA	0.6744	0.6897	0.7071	0.7142	0.7083	0.7199	0.7077	0.71705
Linear SVM	ANOVA F-test	MSI Status	20	miRNA	0.7107	0.689	0.7613	0.7275	0.7361	0.7328	0.7487	0.73015
Random Forest	LASSO	MSI Status	10	miRNA	0.686	0.6885	0.7306	0.7003	0.6042	0.6073	0.6674	0.6538
Random Forest	ANOVA F-test	MSI Status	10	miRNA	0.6964	0.6827	0.8226	0.782	0.6736	0.6748	0.7481	0.7284
LightGBM	SVM	MSI Status	50	miRNA	0.6882	0.6826	0.6931	0.6637	0.6736	0.6748	0.6834	0.66925
KNN	LASSO	MSI Status	150	miRNA	0.6695	0.6814	0.7378	0.7459	0.6319	0.6369	0.6848	0.6914
LightGBM	SVM	MSI Status	10	miRNA	0.6893	0.6791	0.6181	0.5927	0.5694	0.5699	0.5938	0.5813
LightGBM	Random Forest	MSI Status	10	miRNA	0.6739	0.6739	0.7068	0.6826	0.6875	0.6975	0.6971	0.69005
LightGBM	ANOVA F-test	MSI Status	20	miRNA	0.6739	0.6739	0.775	0.7482	0.7292	0.7423	0.7521	0.74525
KNN	SVM	MSI Status	20	miRNA	0.6657	0.6711	0.608	0.5913	0.5417	0.5421	0.5748	0.5667
Linear SVM	ANOVA F-test	MSI Status	10	miRNA	0.6997	0.6695	0.8258	0.7662	0.7083	0.7038	0.7671	0.735
Random Forest	Random Forest	MSI Status	10	miRNA	0.6641	0.6536	0.775	0.7482	0.6806	0.6793	0.7278	0.71375
Linear SVM	SVM	MSI Status	10	miRNA	0.6449	0.6353	0.683	0.6643	0.6111	0.6065	0.6471	0.6354
LightGBM	ANOVA F-test	MSI Status	10	miRNA	0.6246	0.6196	0.7306	0.7003	0.6667	0.6699	0.6986	0.6851
KNN	LASSO	MSI Status	50	miRNA	0.5872	0.5778	0.7482	0.7846	0.6458	0.6535	0.697	0.71905
KNN	SVM	MSI Status	10	miRNA	0.5236	0.4958	0.5881	0.5963	0.5069	0.4938	0.5475	0.54505

## Sheet: Supplementary Table-S5
Supplementary Table S5. Performance of single-omics models for genomic subtype classification across all evaluation sets. Single-omics model performance evaluated across three molecular layers (mRNA expression, DNA methylation, and miRNA expression) for four-class genomic subtype classification (CNV-High, CNV-Low, MSI, and POLE). Results are reported for all combinations of model architecture, fe…
Model	Feature Selection Method	Prediction Task	Number of Features	Data Type	Validation Balanced Accuracy	Validation Macro F1	Test Set 2 Balanced Accuracy	Test Set 2 Macro F1	Test Set 3 Balanced Accuracy	Test Set 3 Macro F1	Avg External Accuracy	Avg External Macro F1
MLP	LASSO	Genomic Subtype	100	RNA Seq	0.8696	0.8682	0.773	0.7568	0.7405	0.6998	0.7568	0.7283
Linear SVM	SVM	Genomic Subtype	200	RNA Seq	0.8476	0.8638	0.7957	0.8035	0.7906	0.7827	0.7932	0.7931
MLP	SVM	Genomic Subtype	150	RNA Seq	0.8449	0.8547	0.7332	0.7042	0.7636	0.6898	0.7484	0.697
GNN	SVM	Genomic Subtype	200	RNA Seq	0.8279	0.8497	0.7957	0.8103	0.7806	0.7579	0.7881	0.7841
MLP	SVM	Genomic Subtype	200	RNA Seq	0.8344	0.8486	0.7787	0.7812	0.8494	0.8219	0.814	0.80155
MLP	LASSO	Genomic Subtype	200	RNA Seq	0.8281	0.8433	0.7446	0.6946	0.7346	0.6536	0.7396	0.6741
MLP	LASSO	Genomic Subtype	150	RNA Seq	0.825	0.8409	0.7725	0.7626	0.6888	0.631	0.7307	0.6968
GNN	SVM	Genomic Subtype	150	RNA Seq	0.8308	0.8399	0.7384	0.7063	0.7406	0.6392	0.7395	0.67275
LightGBM	LASSO	Genomic Subtype	100	RNA Seq	0.8255	0.8395	0.8014	0.8182	0.7137	0.6831	0.7575	0.75065
Linear SVM	SVM	Genomic Subtype	150	RNA Seq	0.8116	0.8327	0.7089	0.7151	0.7096	0.6935	0.7092	0.7043
MLP	SVM	Genomic Subtype	100	RNA Seq	0.8106	0.83	0.7486	0.7733	0.7416	0.7235	0.7451	0.7484
MLP	Random Forest	Genomic Subtype	50	RNA Seq	0.822	0.8281	0.7827	0.7977	0.7475	0.7011	0.7651	0.7494
LightGBM	LASSO	Genomic Subtype	50	RNA Seq	0.8053	0.8218	0.7616	0.7543	0.7626	0.7125	0.7621	0.7334
MLP	Random Forest	Genomic Subtype	100	RNA Seq	0.8267	0.818	0.8428	0.8417	0.7647	0.6845	0.8037	0.7631
LightGBM	Random Forest	Genomic Subtype	150	RNA Seq	0.8161	0.8164	0.8122	0.8339	0.8253	0.7796	0.8188	0.80675
LightGBM	SVM	Genomic Subtype	200	RNA Seq	0.8019	0.8154	0.7787	0.7791	0.7174	0.6637	0.748	0.7214
GNN	LASSO	Genomic Subtype	100	RNA Seq	0.8065	0.8151	0.7787	0.8014	0.8346	0.792	0.8066	0.7967
GNN	LASSO	Genomic Subtype	200	RNA Seq	0.806	0.8142	0.7616	0.7573	0.8137	0.7498	0.7876	0.75355
Linear SVM	SVM	Genomic Subtype	100	RNA Seq	0.7921	0.8141	0.7073	0.7035	0.6755	0.6437	0.6914	0.6736
MLP	LASSO	Genomic Subtype	150	Methylation	0.7986	0.813	0.6431	0.6506	0.7249	0.6607	0.684	0.65565
GNN	Random Forest	Genomic Subtype	100	RNA Seq	0.8069	0.8113	0.806	0.8073	0.7697	0.6908	0.7879	0.74905
GNN	LASSO	Genomic Subtype	50	RNA Seq	0.8083	0.8099	0.7121	0.618	0.5957	0.4998	0.6539	0.5589
LightGBM	Random Forest	Genomic Subtype	100	RNA Seq	0.8006	0.8091	0.8185	0.8462	0.7356	0.6836	0.7771	0.7649
MLP	Random Forest	Genomic Subtype	200	RNA Seq	0.8053	0.8072	0.8258	0.8267	0.7677	0.7117	0.7968	0.7692
GNN	SVM	Genomic Subtype	200	Methylation	0.806	0.8067	0.6964	0.7207	0.6328	0.581	0.6646	0.65085
Linear SVM	LASSO	Genomic Subtype	100	RNA Seq	0.7892	0.8063	0.8071	0.8097	0.7568	0.7227	0.782	0.7662
Linear SVM	Random Forest	Genomic Subtype	50	RNA Seq	0.8178	0.8053	0.8252	0.8188	0.7667	0.6911	0.796	0.75495
GNN	LASSO	Genomic Subtype	150	Methylation	0.8175	0.8041	0.7327	0.7265	0.7	0.6194	0.7164	0.67295
KNN	LASSO	Genomic Subtype	100	RNA Seq	0.784	0.8033	0.7844	0.7922	0.7525	0.7217	0.7684	0.75695
Linear SVM	LASSO	Genomic Subtype	200	Methylation	0.7857	0.8016	0.7776	0.7817	0.7958	0.7333	0.7867	0.7575
LightGBM	Random Forest	Genomic Subtype	200	RNA Seq	0.7953	0.7988	0.8009	0.8153	0.7683	0.7275	0.7846	0.7714
GNN	SVM	Genomic Subtype	100	RNA Seq	0.7921	0.7968	0.8201	0.7699	0.7825	0.7066	0.8013	0.73825
MLP	SVM	Genomic Subtype	200	Methylation	0.8112	0.7963	0.7032	0.6895	0.6919	0.6186	0.6976	0.65405
LightGBM	SVM	Genomic Subtype	150	RNA Seq	0.7872	0.7959	0.7481	0.7571	0.7483	0.7103	0.7482	0.7337
GNN	Random Forest	Genomic Subtype	150	RNA Seq	0.7803	0.7942	0.8314	0.826	0.8356	0.7501	0.8335	0.78805
Linear SVM	LASSO	Genomic Subtype	50	RNA Seq	0.7822	0.794	0.7446	0.7258	0.8065	0.7306	0.7755	0.7282
Linear SVM	Random Forest	Genomic Subtype	100	RNA Seq	0.7902	0.7929	0.8598	0.871	0.7736	0.6994	0.8167	0.7852
GNN	Random Forest	Genomic Subtype	200	RNA Seq	0.7913	0.7922	0.8439	0.8219	0.7997	0.6943	0.8218	0.7581
LightGBM	LASSO	Genomic Subtype	150	RNA Seq	0.7746	0.7918	0.8071	0.8177	0.6916	0.6618	0.7493	0.73975
MLP	LASSO	Genomic Subtype	200	Methylation	0.7852	0.7885	0.6732	0.6662	0.7049	0.6426	0.689	0.6544
Linear SVM	LASSO	Genomic Subtype	150	RNA Seq	0.7757	0.7868	0.8009	0.8041	0.734	0.6783	0.7674	0.7412
Random Forest	LASSO	Genomic Subtype	100	RNA Seq	0.7611	0.7832	0.7895	0.8027	0.7329	0.6968	0.7612	0.74975
LightGBM	LASSO	Genomic Subtype	200	RNA Seq	0.7625	0.7827	0.8128	0.8232	0.6885	0.6616	0.7507	0.7424
Linear SVM	LASSO	Genomic Subtype	200	RNA Seq	0.762	0.7824	0.7725	0.7644	0.8077	0.7228	0.7901	0.7436
MLP	Random Forest	Genomic Subtype	150	RNA Seq	0.7845	0.7818	0.8728	0.8696	0.8564	0.7826	0.8646	0.8261
MLP	SVM	Genomic Subtype	100	Methylation	0.7872	0.7809	0.6981	0.6552	0.6717	0.606	0.6849	0.6306
MLP	SVM	Genomic Subtype	50	Methylation	0.7828	0.7808	0.6726	0.6618	0.585	0.525	0.6288	0.5934
MLP	Random Forest	Genomic Subtype	150	Methylation	0.7741	0.7803	0.7048	0.647	0.7669	0.6669	0.7359	0.65695
GNN	ANOVA F-test	Genomic Subtype	100	RNA Seq	0.7889	0.7802	0.8298	0.8085	0.6421	0.5734	0.7359	0.69095
MLP	LASSO	Genomic Subtype	50	RNA Seq	0.7719	0.778	0.6669	0.6548	0.7074	0.6512	0.6872	0.653
Random Forest	SVM	Genomic Subtype	100	RNA Seq	0.7613	0.7755	0.7311	0.7325	0.7503	0.702	0.7407	0.71725
GNN	Random Forest	Genomic Subtype	50	RNA Seq	0.7676	0.7748	0.7067	0.7119	0.7047	0.6426	0.7057	0.67725
LightGBM	Random Forest	Genomic Subtype	50	RNA Seq	0.7572	0.7723	0.7725	0.7886	0.7514	0.7124	0.7619	0.7505
LightGBM	LASSO	Genomic Subtype	100	Methylation	0.7649	0.7723	0.6437	0.6461	0.6149	0.5738	0.6293	0.60995
Random Forest	Random Forest	Genomic Subtype	100	RNA Seq	0.7703	0.7718	0.8128	0.8182	0.7856	0.7391	0.7992	0.77865
GNN	SVM	Genomic Subtype	50	RNA Seq	0.7539	0.7716	0.7119	0.7064	0.6774	0.6479	0.6946	0.67715
Random Forest	SVM	Genomic Subtype	150	RNA Seq	0.749	0.7678	0.7668	0.777	0.6774	0.6378	0.7221	0.7074
MLP	SVM	Genomic Subtype	150	Methylation	0.777	0.7677	0.7673	0.7318	0.6397	0.5968	0.7035	0.6643
Linear SVM	SVM	Genomic Subtype	200	Methylation	0.76	0.7665	0.7492	0.7636	0.6828	0.6286	0.716	0.6961
MLP	Random Forest	Genomic Subtype	20	RNA Seq	0.7543	0.7622	0.6653	0.6586	0.7433	0.6917	0.7043	0.67515
Random Forest	LASSO	Genomic Subtype	150	RNA Seq	0.7531	0.7611	0.8009	0.8172	0.6398	0.6033	0.7204	0.71025
Linear SVM	Random Forest	Genomic Subtype	200	RNA Seq	0.7509	0.7609	0.7538	0.7637	0.8064	0.7623	0.7801	0.763
GNN	LASSO	Genomic Subtype	200	Methylation	0.747	0.7593	0.7135	0.7135	0.7397	0.6826	0.7266	0.69805
GNN	LASSO	Genomic Subtype	150	RNA Seq	0.7475	0.7592	0.744	0.7229	0.7368	0.6727	0.7404	0.6978
LightGBM	LASSO	Genomic Subtype	150	Methylation	0.755	0.7589	0.701	0.6922	0.673	0.6445	0.687	0.66835
MLP	ANOVA F-test	Genomic Subtype	100	RNA Seq	0.7872	0.7569	0.8433	0.8131	0.6441	0.5827	0.7437	0.6979
MLP	Random Forest	Genomic Subtype	100	Methylation	0.7424	0.7543	0.7622	0.7125	0.7538	0.6562	0.758	0.68435
MLP	ANOVA F-test	Genomic Subtype	200	RNA Seq	0.7653	0.7529	0.8688	0.7878	0.7144	0.6549	0.7916	0.72135
Random Forest	LASSO	Genomic Subtype	200	RNA Seq	0.7404	0.7524	0.8071	0.8246	0.6696	0.6272	0.7384	0.7259
MLP	LASSO	Genomic Subtype	100	Methylation	0.7783	0.7507	0.6953	0.666	0.6971	0.6216	0.6962	0.6438
GNN	SVM	Genomic Subtype	150	Methylation	0.7517	0.7486	0.7032	0.6703	0.6758	0.621	0.6895	0.64565
Linear SVM	SVM	Genomic Subtype	50	RNA Seq	0.737	0.7471	0.7543	0.7482	0.7314	0.6898	0.7429	0.719
LightGBM	Random Forest	Genomic Subtype	200	Methylation	0.7319	0.745	0.7202	0.7038	0.6378	0.6007	0.679	0.65225
MLP	SVM	Genomic Subtype	50	RNA Seq	0.7412	0.745	0.6561	0.6277	0.7083	0.6389	0.6822	0.6333
GNN	LASSO	Genomic Subtype	150	miRNA	0.7425	0.7448	0.6902	0.6994	0.6423	0.5441	0.6663	0.62175
Random Forest	SVM	Genomic Subtype	200	RNA Seq	0.7253	0.7439	0.7838	0.7801	0.7244	0.6908	0.7541	0.73545
Random Forest	Random Forest	Genomic Subtype	200	RNA Seq	0.7397	0.7436	0.8179	0.8424	0.7575	0.7258	0.7877	0.7841
Random Forest	LASSO	Genomic Subtype	50	RNA Seq	0.735	0.7419	0.7032	0.6909	0.6618	0.6062	0.6825	0.64855
LightGBM	SVM	Genomic Subtype	100	RNA Seq	0.7313	0.7414	0.6675	0.6435	0.7611	0.7079	0.7143	0.6757
MLP	SVM	Genomic Subtype	150	miRNA	0.7457	0.7413	0.6448	0.5978	0.5953	0.5112	0.62	0.5545
Linear SVM	LASSO	Genomic Subtype	150	Methylation	0.7261	0.7413	0.7486	0.7465	0.7731	0.7074	0.7609	0.72695
GNN	Random Forest	Genomic Subtype	20	RNA Seq	0.7444	0.7409	0.8087	0.7721	0.7125	0.6408	0.7606	0.70645
MLP	SVM	Genomic Subtype	200	miRNA	0.7334	0.7409	0.6907	0.677	0.6272	0.5457	0.6589	0.61135
GNN	LASSO	Genomic Subtype	20	RNA Seq	0.7313	0.7407	0.6991	0.6508	0.6835	0.6307	0.6913	0.64075
KNN	LASSO	Genomic Subtype	50	RNA Seq	0.7347	0.7402	0.7016	0.7266	0.7005	0.6801	0.701	0.70335
Linear SVM	LASSO	Genomic Subtype	50	Methylation	0.7364	0.7384	0.7197	0.7207	0.7199	0.6639	0.7198	0.6923
MLP	Random Forest	Genomic Subtype	50	Methylation	0.7125	0.7342	0.7332	0.7008	0.7447	0.6739	0.7389	0.68735
MLP	ANOVA F-test	Genomic Subtype	50	RNA Seq	0.7387	0.7333	0.832	0.7869	0.6579	0.6097	0.745	0.6983
MLP	ANOVA F-test	Genomic Subtype	150	RNA Seq	0.7408	0.7332	0.8133	0.7868	0.7117	0.6516	0.7625	0.7192
MLP	LASSO	Genomic Subtype	200	miRNA	0.7639	0.7322	0.6623	0.6256	0.6594	0.5714	0.6608	0.5985
GNN	Random Forest	Genomic Subtype	150	Methylation	0.7179	0.7313	0.7581	0.7036	0.7278	0.6589	0.7429	0.68125
Random Forest	Random Forest	Genomic Subtype	150	RNA Seq	0.7269	0.7311	0.7465	0.7553	0.7217	0.6748	0.7341	0.71505
Linear SVM	LASSO	Genomic Subtype	100	Methylation	0.7289	0.7308	0.7197	0.7162	0.6889	0.6577	0.7043	0.68695
MLP	Random Forest	Genomic Subtype	200	Methylation	0.7116	0.7299	0.7016	0.6984	0.7388	0.693	0.7202	0.6957
LightGBM	SVM	Genomic Subtype	200	Methylation	0.7109	0.7296	0.6975	0.7041	0.6188	0.5746	0.6582	0.63935
LightGBM	LASSO	Genomic Subtype	20	RNA Seq	0.7238	0.729	0.5614	0.5301	0.5913	0.533	0.5764	0.53155
MLP	LASSO	Genomic Subtype	150	miRNA	0.731	0.729	0.6918	0.6768	0.6822	0.5864	0.687	0.6316
Random Forest	ANOVA F-test	Genomic Subtype	50	RNA Seq	0.7321	0.7287	0.7792	0.7628	0.7517	0.6757	0.7654	0.71925
GNN	Random Forest	Genomic Subtype	200	Methylation	0.7134	0.7274	0.651	0.6295	0.6419	0.5924	0.6464	0.61095
Random Forest	SVM	Genomic Subtype	100	Methylation	0.7093	0.7268	0.6385	0.6218	0.6119	0.5657	0.6252	0.59375
MLP	SVM	Genomic Subtype	100	miRNA	0.7281	0.7264	0.6437	0.6143	0.6178	0.5642	0.6308	0.58925
Linear SVM	Random Forest	Genomic Subtype	20	RNA Seq	0.7235	0.7255	0.773	0.7697	0.7275	0.6761	0.7503	0.7229
LightGBM	Random Forest	Genomic Subtype	20	RNA Seq	0.7149	0.7246	0.7367	0.7321	0.7033	0.668	0.72	0.70005
GNN	ANOVA F-test	Genomic Subtype	50	RNA Seq	0.7242	0.724	0.6824	0.6715	0.6219	0.5763	0.6522	0.6239
LightGBM	LASSO	Genomic Subtype	50	Methylation	0.7082	0.7218	0.6742	0.6747	0.6636	0.6226	0.6689	0.64865
Linear SVM	Random Forest	Genomic Subtype	200	Methylation	0.6959	0.7214	0.7367	0.7246	0.7471	0.6823	0.7419	0.70345
Linear SVM	SVM	Genomic Subtype	150	Methylation	0.715	0.7212	0.6783	0.6762	0.6778	0.6274	0.6781	0.6518
Linear SVM	SVM	Genomic Subtype	50	Methylation	0.7048	0.7208	0.6778	0.6915	0.655	0.6011	0.6664	0.6463
MLP	LASSO	Genomic Subtype	20	RNA Seq	0.7266	0.7195	0.5993	0.5683	0.6396	0.5533	0.6195	0.5608
Linear SVM	Random Forest	Genomic Subtype	150	RNA Seq	0.7173	0.7192	0.7714	0.8009	0.8114	0.7942	0.7914	0.79755
Random Forest	ANOVA F-test	Genomic Subtype	150	RNA Seq	0.716	0.719	0.7952	0.783	0.6947	0.6337	0.745	0.70835
Linear SVM	LASSO	Genomic Subtype	20	RNA Seq	0.7106	0.7179	0.5517	0.5323	0.6413	0.579	0.5965	0.55565
GNN	LASSO	Genomic Subtype	100	miRNA	0.7331	0.7173	0.6856	0.6712	0.6465	0.5491	0.6661	0.61015
Random Forest	Random Forest	Genomic Subtype	200	Methylation	0.7029	0.7167	0.6488	0.6299	0.6291	0.5763	0.639	0.6031
MLP	Random Forest	Genomic Subtype	200	miRNA	0.7291	0.7164	0.6613	0.6377	0.6792	0.5843	0.6703	0.611
Random Forest	ANOVA F-test	Genomic Subtype	100	RNA Seq	0.7165	0.7162	0.836	0.8148	0.7217	0.6695	0.7789	0.74215
MLP	LASSO	Genomic Subtype	10	RNA Seq	0.7112	0.7158	0.622	0.5846	0.6363	0.5233	0.6291	0.55395
Linear SVM	Random Forest	Genomic Subtype	150	Methylation	0.6989	0.7144	0.7792	0.7652	0.7669	0.6989	0.7731	0.73205
GNN	ANOVA F-test	Genomic Subtype	200	RNA Seq	0.7142	0.7135	0.7673	0.7268	0.6081	0.5527	0.6877	0.63975
MLP	LASSO	Genomic Subtype	100	miRNA	0.7188	0.7135	0.6851	0.6489	0.6403	0.5646	0.6627	0.60675
Linear SVM	Random Forest	Genomic Subtype	100	Methylation	0.7029	0.713	0.7741	0.7293	0.7269	0.6691	0.7505	0.6992
LightGBM	Random Forest	Genomic Subtype	50	Methylation	0.6953	0.712	0.6913	0.6949	0.6621	0.6347	0.6767	0.6648
GNN	ANOVA F-test	Genomic Subtype	150	RNA Seq	0.7113	0.7108	0.7941	0.7864	0.733	0.6697	0.7635	0.72805
Linear SVM	ANOVA F-test	Genomic Subtype	100	RNA Seq	0.7084	0.7106	0.7941	0.7839	0.6978	0.6363	0.746	0.7101
MLP	Random Forest	Genomic Subtype	20	Methylation	0.7068	0.7106	0.74	0.6761	0.6871	0.5396	0.7136	0.60785
MLP	LASSO	Genomic Subtype	50	Methylation	0.7098	0.7104	0.7321	0.7194	0.7447	0.6894	0.7384	0.7044
LightGBM	SVM	Genomic Subtype	50	RNA Seq	0.701	0.7102	0.6602	0.6535	0.7372	0.6899	0.6987	0.6717
GNN	Random Forest	Genomic Subtype	20	Methylation	0.7205	0.7097	0.7292	0.6566	0.5994	0.4691	0.6643	0.56285
MLP	Random Forest	Genomic Subtype	10	RNA Seq	0.7207	0.7092	0.6986	0.6403	0.6275	0.5685	0.663	0.6044
Random Forest	Random Forest	Genomic Subtype	50	RNA Seq	0.7037	0.7088	0.7538	0.7693	0.6736	0.6331	0.7137	0.7012
KNN	LASSO	Genomic Subtype	200	Methylation	0.689	0.7081	0.6312	0.6323	0.6251	0.6131	0.6281	0.6227
MLP	SVM	Genomic Subtype	20	Methylation	0.7057	0.7079	0.6147	0.5915	0.6032	0.537	0.6089	0.56425
GNN	SVM	Genomic Subtype	200	miRNA	0.7041	0.7078	0.6607	0.6483	0.6206	0.5567	0.6406	0.6025
GNN	SVM	Genomic Subtype	50	miRNA	0.7202	0.7078	0.6069	0.5971	0.6261	0.5422	0.6165	0.56965
Random Forest	Random Forest	Genomic Subtype	150	Methylation	0.6926	0.7078	0.6607	0.6444	0.593	0.5408	0.6268	0.5926
LightGBM	Random Forest	Genomic Subtype	150	Methylation	0.6931	0.7074	0.6918	0.6775	0.6919	0.6553	0.6918	0.6664
Linear SVM	Random Forest	Genomic Subtype	50	Methylation	0.6879	0.7065	0.7673	0.7463	0.6878	0.6298	0.7275	0.68805
GNN	Random Forest	Genomic Subtype	100	Methylation	0.6953	0.7065	0.7741	0.719	0.6558	0.575	0.7149	0.647
LightGBM	SVM	Genomic Subtype	50	Methylation	0.6997	0.7057	0.6648	0.6673	0.6991	0.6187	0.682	0.643
KNN	LASSO	Genomic Subtype	150	RNA Seq	0.6989	0.705	0.7073	0.6982	0.7325	0.7076	0.7199	0.7029
GNN	LASSO	Genomic Subtype	200	miRNA	0.7165	0.7045	0.697	0.6694	0.6821	0.5972	0.6895	0.6333
Linear SVM	ANOVA F-test	Genomic Subtype	200	RNA Seq	0.6998	0.7036	0.819	0.7977	0.6947	0.6292	0.7569	0.71345
LightGBM	ANOVA F-test	Genomic Subtype	100	RNA Seq	0.6998	0.7029	0.7238	0.7302	0.7356	0.7025	0.7297	0.71635
MLP	SVM	Genomic Subtype	50	miRNA	0.7126	0.7027	0.5955	0.5889	0.6769	0.6022	0.6362	0.59555
Random Forest	Random Forest	Genomic Subtype	100	Methylation	0.6874	0.7009	0.697	0.6549	0.598	0.5455	0.6475	0.6002
GNN	LASSO	Genomic Subtype	50	Methylation	0.6971	0.7003	0.6902	0.692	0.7878	0.6907	0.739	0.69135
Linear SVM	LASSO	Genomic Subtype	200	miRNA	0.694	0.6992	0.727	0.7318	0.6781	0.582	0.7026	0.6569
MLP	Random Forest	Genomic Subtype	150	miRNA	0.7139	0.6988	0.6959	0.6757	0.6744	0.585	0.6851	0.63035
Linear SVM	SVM	Genomic Subtype	150	miRNA	0.7008	0.6984	0.6494	0.6541	0.6439	0.5671	0.6466	0.6106
MLP	Random Forest	Genomic Subtype	100	miRNA	0.6961	0.6976	0.7151	0.7171	0.6871	0.6294	0.7011	0.67325
GNN	ANOVA F-test	Genomic Subtype	200	miRNA	0.6944	0.697	0.6307	0.6305	0.6892	0.593	0.66	0.61175
Linear SVM	LASSO	Genomic Subtype	150	miRNA	0.6932	0.6968	0.6907	0.6898	0.6353	0.5169	0.663	0.60335
MLP	ANOVA F-test	Genomic Subtype	200	miRNA	0.7387	0.6963	0.6964	0.6501	0.6835	0.5441	0.69	0.5971
Linear SVM	ANOVA F-test	Genomic Subtype	150	RNA Seq	0.6893	0.6962	0.8185	0.7944	0.6667	0.6208	0.7426	0.7076
Random Forest	LASSO	Genomic Subtype	150	Methylation	0.6822	0.6961	0.7378	0.7374	0.6269	0.5827	0.6824	0.66005
LightGBM	SVM	Genomic Subtype	20	RNA Seq	0.6864	0.696	0.596	0.5533	0.6003	0.521	0.5981	0.53715
Linear SVM	ANOVA F-test	Genomic Subtype	50	RNA Seq	0.6996	0.6958	0.7476	0.7552	0.6879	0.6526	0.7177	0.7039
LightGBM	ANOVA F-test	Genomic Subtype	50	RNA Seq	0.6941	0.6949	0.7486	0.7442	0.6877	0.6403	0.7182	0.69225
Random Forest	Random Forest	Genomic Subtype	50	Methylation	0.6798	0.6946	0.744	0.7042	0.608	0.5688	0.676	0.6365
Random Forest	Random Forest	Genomic Subtype	10	RNA Seq	0.7015	0.6944	0.5154	0.5043	0.6386	0.5382	0.577	0.52125
Linear SVM	Random Forest	Genomic Subtype	20	Methylation	0.7052	0.6942	0.7173	0.6433	0.616	0.5385	0.6666	0.5909
LightGBM	LASSO	Genomic Subtype	200	Methylation	0.6834	0.6941	0.7316	0.7445	0.7369	0.7028	0.7343	0.72365
GNN	SVM	Genomic Subtype	150	miRNA	0.7012	0.693	0.6488	0.6387	0.5711	0.4968	0.6099	0.56775
MLP	LASSO	Genomic Subtype	50	miRNA	0.7054	0.6927	0.6669	0.6398	0.6633	0.5557	0.6651	0.59775
LightGBM	Random Forest	Genomic Subtype	100	Methylation	0.6838	0.6921	0.7814	0.7388	0.713	0.6545	0.7472	0.69665
LightGBM	ANOVA F-test	Genomic Subtype	150	RNA Seq	0.6912	0.6921	0.7895	0.7993	0.7267	0.6787	0.7581	0.739
MLP	ANOVA F-test	Genomic Subtype	10	RNA Seq	0.6984	0.6914	0.5982	0.5673	0.6138	0.5234	0.606	0.54535
Random Forest	Random Forest	Genomic Subtype	20	RNA Seq	0.6841	0.6902	0.6851	0.6724	0.6536	0.6014	0.6694	0.6369
GNN	LASSO	Genomic Subtype	100	Methylation	0.6837	0.69	0.6953	0.7024	0.7339	0.6582	0.7146	0.6803
Linear SVM	SVM	Genomic Subtype	20	Methylation	0.7044	0.6893	0.5717	0.5573	0.636	0.564	0.6038	0.56065
KNN	Random Forest	Genomic Subtype	20	RNA Seq	0.6817	0.6878	0.641	0.6439	0.7264	0.7219	0.6837	0.6829
Random Forest	LASSO	Genomic Subtype	200	Methylation	0.667	0.6872	0.6829	0.6734	0.6119	0.5689	0.6474	0.62115
Random Forest	SVM	Genomic Subtype	150	Methylation	0.6729	0.6866	0.6742	0.6288	0.5669	0.5005	0.6205	0.56465
GNN	SVM	Genomic Subtype	20	Methylation	0.6631	0.6865	0.5433	0.5162	0.5689	0.4928	0.5561	0.5045
KNN	LASSO	Genomic Subtype	20	RNA Seq	0.681	0.6864	0.5557	0.5393	0.6026	0.5439	0.5792	0.5416
GNN	SVM	Genomic Subtype	50	Methylation	0.6852	0.686	0.6913	0.6371	0.7481	0.6294	0.7197	0.63325
GNN	ANOVA F-test	Genomic Subtype	10	RNA Seq	0.6913	0.6841	0.7394	0.688	0.5619	0.5067	0.6506	0.59735
Linear SVM	Random Forest	Genomic Subtype	10	RNA Seq	0.6819	0.6832	0.6986	0.6506	0.7467	0.6055	0.7227	0.62805
LightGBM	Random Forest	Genomic Subtype	20	Methylation	0.6786	0.6829	0.5858	0.5637	0.6149	0.5878	0.6003	0.57575
KNN	ANOVA F-test	Genomic Subtype	150	RNA Seq	0.6792	0.682	0.701	0.7092	0.6925	0.6943	0.6967	0.70175
MLP	ANOVA F-test	Genomic Subtype	100	Methylation	0.7038	0.6809	0.5522	0.5178	0.6903	0.5867	0.6213	0.55225
Linear SVM	SVM	Genomic Subtype	200	miRNA	0.6759	0.6809	0.7673	0.7721	0.6419	0.5667	0.7046	0.6694
MLP	ANOVA F-test	Genomic Subtype	150	Methylation	0.6595	0.6804	0.6199	0.5977	0.7201	0.6239	0.67	0.6108
GNN	SVM	Genomic Subtype	20	RNA Seq	0.675	0.6801	0.5955	0.5713	0.6357	0.5925	0.6156	0.5819
Random Forest	ANOVA F-test	Genomic Subtype	200	RNA Seq	0.6743	0.6797	0.7408	0.7376	0.6997	0.6582	0.7203	0.6979
Linear SVM	LASSO	Genomic Subtype	20	Methylation	0.672	0.6795	0.6488	0.638	0.6391	0.5788	0.644	0.6084
LightGBM	LASSO	Genomic Subtype	200	miRNA	0.6716	0.6792	0.7668	0.7899	0.7269	0.6637	0.7469	0.7268
Linear SVM	Random Forest	Genomic Subtype	150	miRNA	0.6729	0.679	0.7549	0.7445	0.668	0.6231	0.7115	0.6838
KNN	LASSO	Genomic Subtype	150	Methylation	0.6733	0.679	0.6199	0.6181	0.674	0.6696	0.647	0.64385
GNN	Random Forest	Genomic Subtype	150	miRNA	0.6782	0.6789	0.6981	0.678	0.7243	0.6233	0.7112	0.65065
LightGBM	LASSO	Genomic Subtype	10	RNA Seq	0.6787	0.678	0.5847	0.5595	0.6392	0.5725	0.6119	0.566
GNN	LASSO	Genomic Subtype	50	miRNA	0.6675	0.676	0.714	0.6867	0.5783	0.4875	0.6462	0.5871
GNN	ANOVA F-test	Genomic Subtype	150	miRNA	0.6816	0.676	0.71	0.6731	0.6271	0.5727	0.6685	0.6229
MLP	ANOVA F-test	Genomic Subtype	150	miRNA	0.6788	0.6747	0.668	0.6279	0.6203	0.584	0.6442	0.60595
GNN	SVM	Genomic Subtype	100	miRNA	0.6741	0.6743	0.6323	0.604	0.6261	0.5457	0.6292	0.57485
LightGBM	SVM	Genomic Subtype	10	Methylation	0.6722	0.6741	0.6918	0.6327	0.5743	0.4939	0.6331	0.5633
LightGBM	LASSO	Genomic Subtype	150	miRNA	0.6763	0.6741	0.6732	0.6829	0.6769	0.6094	0.675	0.64615
MLP	Random Forest	Genomic Subtype	10	Methylation	0.6619	0.6736	0.5574	0.5212	0.5085	0.4509	0.533	0.48605
Random Forest	Random Forest	Genomic Subtype	100	miRNA	0.67	0.6732	0.7083	0.7198	0.6989	0.6555	0.7036	0.68765
Linear SVM	LASSO	Genomic Subtype	50	miRNA	0.6752	0.6727	0.6199	0.6045	0.6346	0.5368	0.6273	0.57065
Random Forest	Random Forest	Genomic Subtype	20	Methylation	0.6541	0.6725	0.5909	0.5736	0.613	0.5709	0.6019	0.57225
GNN	SVM	Genomic Subtype	100	Methylation	0.6886	0.6725	0.5785	0.5797	0.7199	0.646	0.6492	0.61285
LightGBM	ANOVA F-test	Genomic Subtype	200	RNA Seq	0.6685	0.6724	0.8071	0.8145	0.7306	0.6789	0.7689	0.7467
MLP	ANOVA F-test	Genomic Subtype	20	RNA Seq	0.6792	0.6717	0.7508	0.6708	0.513	0.4936	0.6319	0.5822
KNN	ANOVA F-test	Genomic Subtype	10	RNA Seq	0.6702	0.6708	0.6177	0.5976	0.556	0.5273	0.5869	0.56245
GNN	Random Forest	Genomic Subtype	50	Methylation	0.6606	0.6698	0.6794	0.6735	0.6671	0.6311	0.6733	0.6523
LightGBM	Random Forest	Genomic Subtype	10	RNA Seq	0.6633	0.6689	0.5785	0.5693	0.6025	0.5384	0.5905	0.55385
Linear SVM	ANOVA F-test	Genomic Subtype	100	Methylation	0.6681	0.6681	0.6618	0.6175	0.6671	0.5947	0.6644	0.6061
GNN	ANOVA F-test	Genomic Subtype	20	RNA Seq	0.6705	0.6675	0.6039	0.5535	0.6208	0.5298	0.6123	0.54165
MLP	SVM	Genomic Subtype	20	RNA Seq	0.6581	0.6671	0.5904	0.542	0.5846	0.5262	0.5875	0.5341
Random Forest	LASSO	Genomic Subtype	100	Methylation	0.6618	0.667	0.6675	0.6702	0.6269	0.5945	0.6472	0.63235
LightGBM	Random Forest	Genomic Subtype	50	miRNA	0.6614	0.6668	0.7259	0.7219	0.6172	0.5392	0.6715	0.63055
LightGBM	SVM	Genomic Subtype	50	miRNA	0.6609	0.6662	0.6142	0.6047	0.6	0.5415	0.6071	0.5731
GNN	ANOVA F-test	Genomic Subtype	100	miRNA	0.663	0.666	0.6494	0.6686	0.6362	0.5889	0.6428	0.62875
MLP	ANOVA F-test	Genomic Subtype	50	miRNA	0.6699	0.6657	0.6334	0.6146	0.6305	0.5282	0.632	0.5714
LightGBM	SVM	Genomic Subtype	20	Methylation	0.649	0.665	0.6074	0.5979	0.6041	0.5564	0.6058	0.57715
KNN	LASSO	Genomic Subtype	50	Methylation	0.6515	0.6647	0.6364	0.625	0.5838	0.5376	0.6101	0.5813
Random Forest	LASSO	Genomic Subtype	20	RNA Seq	0.6588	0.6622	0.6272	0.6272	0.6166	0.565	0.6219	0.5961
Linear SVM	ANOVA F-test	Genomic Subtype	10	RNA Seq	0.6577	0.6622	0.6907	0.6636	0.6849	0.5844	0.6878	0.624
MLP	LASSO	Genomic Subtype	20	miRNA	0.6676	0.6619	0.5314	0.5141	0.5215	0.4591	0.5264	0.4866
KNN	ANOVA F-test	Genomic Subtype	200	RNA Seq	0.6647	0.6618	0.6669	0.6601	0.6856	0.6756	0.6763	0.66785
Linear SVM	SVM	Genomic Subtype	20	RNA Seq	0.6527	0.6617	0.6074	0.5829	0.6176	0.5624	0.6125	0.57265
KNN	Random Forest	Genomic Subtype	200	Methylation	0.6402	0.6617	0.5609	0.5643	0.6829	0.6665	0.6219	0.6154
Random Forest	SVM	Genomic Subtype	200	Methylation	0.6451	0.661	0.7378	0.7275	0.5969	0.5415	0.6673	0.6345
MLP	Random Forest	Genomic Subtype	50	miRNA	0.6923	0.6609	0.6448	0.6012	0.6963	0.5626	0.6705	0.5819
MLP	ANOVA F-test	Genomic Subtype	100	miRNA	0.6627	0.6608	0.6742	0.6527	0.5554	0.516	0.6148	0.58435
Random Forest	SVM	Genomic Subtype	20	RNA Seq	0.6525	0.6608	0.562	0.5218	0.5546	0.498	0.5583	0.5099
Linear SVM	SVM	Genomic Subtype	100	miRNA	0.6643	0.6601	0.6732	0.6499	0.6861	0.5898	0.6797	0.61985
GNN	Random Forest	Genomic Subtype	10	RNA Seq	0.6601	0.6596	0.5841	0.5474	0.5775	0.5288	0.5808	0.5381
KNN	ANOVA F-test	Genomic Subtype	100	RNA Seq	0.6571	0.6564	0.7067	0.7187	0.6916	0.693	0.6991	0.70585
KNN	LASSO	Genomic Subtype	200	RNA Seq	0.6684	0.6543	0.7316	0.7412	0.6875	0.6652	0.7096	0.7032
Random Forest	LASSO	Genomic Subtype	50	Methylation	0.6484	0.6525	0.684	0.6911	0.6348	0.6037	0.6594	0.6474
LightGBM	Random Forest	Genomic Subtype	200	miRNA	0.6496	0.6522	0.7435	0.7616	0.6839	0.6353	0.7137	0.69845
KNN	SVM	Genomic Subtype	100	RNA Seq	0.6676	0.651	0.6415	0.6035	0.7353	0.7358	0.6884	0.66965
Linear SVM	Random Forest	Genomic Subtype	200	miRNA	0.652	0.6505	0.7197	0.73	0.7028	0.6647	0.7112	0.69735
Random Forest	ANOVA F-test	Genomic Subtype	20	RNA Seq	0.6477	0.6504	0.6136	0.6024	0.6086	0.5435	0.6111	0.57295
GNN	Random Forest	Genomic Subtype	50	miRNA	0.6819	0.6504	0.6664	0.6319	0.7022	0.5545	0.6843	0.5932
LightGBM	SVM	Genomic Subtype	200	miRNA	0.6537	0.6503	0.7265	0.7227	0.6878	0.6367	0.7071	0.6797
LightGBM	Random Forest	Genomic Subtype	100	miRNA	0.6564	0.65	0.6913	0.6859	0.6833	0.6096	0.6873	0.64775
Linear SVM	LASSO	Genomic Subtype	100	miRNA	0.6505	0.6489	0.6845	0.6837	0.6442	0.5691	0.6643	0.6264
GNN	ANOVA F-test	Genomic Subtype	50	miRNA	0.6441	0.6486	0.6339	0.5936	0.6891	0.6153	0.6615	0.60445
LightGBM	SVM	Genomic Subtype	150	Methylation	0.6423	0.6473	0.727	0.6962	0.593	0.5537	0.66	0.62495
Linear SVM	Random Forest	Genomic Subtype	50	miRNA	0.6537	0.6467	0.6856	0.6812	0.7208	0.66	0.7032	0.6706
Random Forest	LASSO	Genomic Subtype	200	miRNA	0.6581	0.6466	0.7435	0.7629	0.7181	0.6486	0.7308	0.70575
GNN	LASSO	Genomic Subtype	10	RNA Seq	0.6452	0.6466	0.6691	0.6291	0.7035	0.5934	0.6863	0.61125
KNN	SVM	Genomic Subtype	200	Methylation	0.6386	0.646	0.625	0.6245	0.6538	0.6285	0.6394	0.6265
LightGBM	SVM	Genomic Subtype	100	Methylation	0.6394	0.6451	0.697	0.697	0.583	0.5337	0.64	0.61535
KNN	Random Forest	Genomic Subtype	50	RNA Seq	0.6487	0.6439	0.76	0.7982	0.7764	0.7802	0.7682	0.7892
MLP	ANOVA F-test	Genomic Subtype	200	Methylation	0.6409	0.6434	0.5977	0.5622	0.653	0.546	0.6254	0.5541
Random Forest	LASSO	Genomic Subtype	150	miRNA	0.6448	0.6433	0.7202	0.7367	0.72	0.6464	0.7201	0.69155
LightGBM	LASSO	Genomic Subtype	20	Methylation	0.6368	0.6433	0.6209	0.6012	0.591	0.5371	0.6059	0.56915
LightGBM	ANOVA F-test	Genomic Subtype	10	RNA Seq	0.642	0.643	0.5785	0.5553	0.6658	0.6123	0.6221	0.5838
Linear SVM	LASSO	Genomic Subtype	10	RNA Seq	0.6432	0.6418	0.5863	0.5753	0.6207	0.5364	0.6035	0.55585
MLP	LASSO	Genomic Subtype	20	Methylation	0.6409	0.6416	0.7037	0.6625	0.541	0.4888	0.6223	0.57565
Random Forest	SVM	Genomic Subtype	50	RNA Seq	0.6384	0.6386	0.7032	0.6856	0.7164	0.6598	0.7098	0.6727
GNN	ANOVA F-test	Genomic Subtype	100	Methylation	0.6371	0.638	0.5449	0.5011	0.5982	0.5272	0.5716	0.51415
GNN	LASSO	Genomic Subtype	20	Methylation	0.6223	0.6379	0.5858	0.5849	0.5521	0.53	0.569	0.55745
LightGBM	SVM	Genomic Subtype	150	miRNA	0.6318	0.6376	0.5852	0.5808	0.6431	0.5736	0.6141	0.5772
LightGBM	SVM	Genomic Subtype	100	miRNA	0.6382	0.6376	0.5587	0.5397	0.6419	0.5771	0.6003	0.5584
Random Forest	LASSO	Genomic Subtype	20	Methylation	0.6316	0.6357	0.7208	0.7081	0.6451	0.5938	0.6829	0.65095
KNN	ANOVA F-test	Genomic Subtype	50	RNA Seq	0.6484	0.635	0.7424	0.7498	0.6979	0.6783	0.7201	0.71405
GNN	Random Forest	Genomic Subtype	10	Methylation	0.6245	0.635	0.6163	0.5375	0.4994	0.4278	0.5578	0.48265
LightGBM	ANOVA F-test	Genomic Subtype	150	miRNA	0.634	0.6343	0.7321	0.7391	0.6358	0.5883	0.684	0.6637
GNN	Random Forest	Genomic Subtype	100	miRNA	0.6214	0.6311	0.605	0.5924	0.669	0.5977	0.637	0.59505
Random Forest	LASSO	Genomic Subtype	100	miRNA	0.643	0.6303	0.6783	0.6905	0.6472	0.5929	0.6627	0.6417
GNN	ANOVA F-test	Genomic Subtype	150	Methylation	0.633	0.6303	0.6504	0.6114	0.6938	0.6089	0.6721	0.61015
GNN	Random Forest	Genomic Subtype	200	miRNA	0.6324	0.6296	0.6618	0.638	0.6693	0.5948	0.6656	0.6164
KNN	Random Forest	Genomic Subtype	100	RNA Seq	0.6444	0.6287	0.8071	0.8354	0.7675	0.7671	0.7873	0.80125
Linear SVM	SVM	Genomic Subtype	100	Methylation	0.6225	0.6276	0.6726	0.6577	0.7228	0.6681	0.6977	0.6629
MLP	SVM	Genomic Subtype	20	miRNA	0.6235	0.6275	0.5097	0.4693	0.6473	0.5004	0.5785	0.48485
Random Forest	ANOVA F-test	Genomic Subtype	10	RNA Seq	0.6257	0.6275	0.6039	0.5878	0.6486	0.5602	0.6262	0.574
Linear SVM	ANOVA F-test	Genomic Subtype	150	miRNA	0.6334	0.6269	0.6499	0.6414	0.6549	0.6037	0.6524	0.62255
LightGBM	LASSO	Genomic Subtype	50	miRNA	0.6285	0.6268	0.5676	0.5661	0.6404	0.5502	0.604	0.55815
LightGBM	LASSO	Genomic Subtype	20	miRNA	0.6171	0.6251	0.5262	0.51	0.5065	0.4412	0.5163	0.4756
Random Forest	SVM	Genomic Subtype	50	Methylation	0.6162	0.6245	0.6193	0.6135	0.6569	0.5983	0.6381	0.6059
KNN	Random Forest	Genomic Subtype	150	Methylation	0.6167	0.624	0.6028	0.6069	0.5958	0.5561	0.5993	0.5815
MLP	SVM	Genomic Subtype	10	RNA Seq	0.6152	0.6237	0.5647	0.5426	0.4801	0.4405	0.5224	0.49155
Linear SVM	LASSO	Genomic Subtype	10	miRNA	0.6288	0.6234	0.5216	0.5062	0.4509	0.3841	0.4862	0.44515
Random Forest	ANOVA F-test	Genomic Subtype	200	Methylation	0.6158	0.6227	0.6437	0.6614	0.6423	0.643	0.643	0.6522
LightGBM	SVM	Genomic Subtype	10	RNA Seq	0.6206	0.622	0.5449	0.517	0.5208	0.4723	0.5329	0.49465
KNN	SVM	Genomic Subtype	20	RNA Seq	0.6131	0.622	0.5806	0.5571	0.5316	0.4526	0.5561	0.50485
KNN	Random Forest	Genomic Subtype	20	miRNA	0.6243	0.6211	0.6131	0.6093	0.6921	0.619	0.6526	0.61415
GNN	Random Forest	Genomic Subtype	20	miRNA	0.6528	0.6207	0.609	0.5519	0.6466	0.481	0.6278	0.51645
Linear SVM	ANOVA F-test	Genomic Subtype	200	miRNA	0.6366	0.6207	0.6788	0.6753	0.7441	0.6364	0.7114	0.65585
MLP	SVM	Genomic Subtype	10	Methylation	0.6279	0.6193	0.5403	0.5119	0.5193	0.4604	0.5298	0.48615
Linear SVM	ANOVA F-test	Genomic Subtype	200	Methylation	0.6101	0.6191	0.744	0.7269	0.7417	0.6751	0.7429	0.701
Linear SVM	ANOVA F-test	Genomic Subtype	20	RNA Seq	0.6188	0.619	0.7606	0.7294	0.5671	0.5239	0.6639	0.62665
Linear SVM	ANOVA F-test	Genomic Subtype	100	miRNA	0.6326	0.6185	0.6613	0.6524	0.6439	0.5958	0.6526	0.6241
MLP	Random Forest	Genomic Subtype	20	miRNA	0.6203	0.6184	0.608	0.5777	0.6063	0.5293	0.6071	0.5535
KNN	SVM	Genomic Subtype	150	Methylation	0.6106	0.6181	0.654	0.6641	0.6721	0.6868	0.6631	0.67545
Random Forest	Random Forest	Genomic Subtype	150	miRNA	0.6343	0.6155	0.6494	0.6417	0.6642	0.6056	0.6568	0.62365
KNN	Random Forest	Genomic Subtype	150	RNA Seq	0.6287	0.6152	0.7067	0.7344	0.8314	0.8552	0.7691	0.7948
Linear SVM	Random Forest	Genomic Subtype	10	Methylation	0.6298	0.6138	0.5766	0.4922	0.5404	0.4556	0.5585	0.4739
KNN	SVM	Genomic Subtype	100	Methylation	0.615	0.6133	0.596	0.5999	0.664	0.6748	0.63	0.63735
Linear SVM	ANOVA F-test	Genomic Subtype	50	miRNA	0.6092	0.6118	0.6607	0.645	0.6283	0.5437	0.6445	0.59435
Random Forest	LASSO	Genomic Subtype	10	RNA Seq	0.6211	0.6117	0.6261	0.6118	0.6716	0.6077	0.6488	0.60975
LightGBM	ANOVA F-test	Genomic Subtype	20	RNA Seq	0.6101	0.6106	0.6591	0.6497	0.6268	0.5935	0.643	0.6216
KNN	Random Forest	Genomic Subtype	10	RNA Seq	0.6239	0.6101	0.5836	0.5752	0.6225	0.5706	0.6031	0.5729
Random Forest	SVM	Genomic Subtype	20	Methylation	0.6027	0.6096	0.5246	0.4851	0.588	0.5288	0.5563	0.50695
GNN	Random Forest	Genomic Subtype	10	miRNA	0.6281	0.6095	0.5387	0.5083	0.6244	0.5166	0.5816	0.51245
Linear SVM	ANOVA F-test	Genomic Subtype	150	Methylation	0.5919	0.6093	0.6561	0.6445	0.693	0.6111	0.6745	0.6278
LightGBM	Random Forest	Genomic Subtype	150	miRNA	0.6109	0.6084	0.727	0.718	0.6352	0.5855	0.6811	0.65175
Linear SVM	ANOVA F-test	Genomic Subtype	50	Methylation	0.6109	0.6083	0.6226	0.5521	0.5354	0.4552	0.579	0.50365
GNN	SVM	Genomic Subtype	10	Methylation	0.6146	0.6066	0.5533	0.5019	0.5514	0.4307	0.5524	0.4663
KNN	Random Forest	Genomic Subtype	100	Methylation	0.6039	0.6054	0.6659	0.6689	0.6819	0.6531	0.6739	0.661
Random Forest	SVM	Genomic Subtype	50	miRNA	0.6148	0.6046	0.6074	0.6044	0.6741	0.5999	0.6408	0.60215
GNN	ANOVA F-test	Genomic Subtype	200	Methylation	0.62	0.6045	0.5584	0.5239	0.5512	0.5176	0.5548	0.52075
Linear SVM	Random Forest	Genomic Subtype	100	miRNA	0.6217	0.6022	0.6715	0.6758	0.6319	0.5799	0.6517	0.62785
MLP	ANOVA F-test	Genomic Subtype	50	Methylation	0.5957	0.6015	0.6028	0.5598	0.6187	0.4877	0.6108	0.52375
KNN	LASSO	Genomic Subtype	100	Methylation	0.6161	0.6013	0.6488	0.6405	0.556	0.519	0.6024	0.57975
Random Forest	ANOVA F-test	Genomic Subtype	200	miRNA	0.6192	0.6012	0.6534	0.6538	0.6711	0.6118	0.6623	0.6328
Linear SVM	SVM	Genomic Subtype	50	miRNA	0.6055	0.6001	0.5904	0.5842	0.725	0.6425	0.6577	0.61335
Random Forest	Random Forest	Genomic Subtype	50	miRNA	0.6073	0.5995	0.6494	0.6368	0.7031	0.6136	0.6763	0.6252
Random Forest	Random Forest	Genomic Subtype	200	miRNA	0.5963	0.5991	0.6953	0.7029	0.6439	0.6095	0.6696	0.6562
Linear SVM	Random Forest	Genomic Subtype	20	miRNA	0.6004	0.5988	0.6339	0.5944	0.5944	0.5195	0.6141	0.55695
LightGBM	LASSO	Genomic Subtype	100	miRNA	0.6027	0.598	0.6188	0.6212	0.6303	0.5498	0.6245	0.5855
Random Forest	SVM	Genomic Subtype	10	RNA Seq	0.5918	0.5965	0.5409	0.5133	0.5526	0.4898	0.5468	0.50155
GNN	LASSO	Genomic Subtype	20	miRNA	0.5942	0.5958	0.5216	0.4958	0.5252	0.4494	0.5234	0.4726
MLP	Random Forest	Genomic Subtype	10	miRNA	0.6107	0.5951	0.5108	0.467	0.5635	0.426	0.5372	0.4465
LightGBM	ANOVA F-test	Genomic Subtype	150	Methylation	0.5931	0.595	0.6805	0.6559	0.639	0.5832	0.6598	0.61955
KNN	SVM	Genomic Subtype	200	RNA Seq	0.6073	0.5948	0.654	0.6451	0.7524	0.748	0.7032	0.69655
Linear SVM	SVM	Genomic Subtype	20	miRNA	0.6063	0.5929	0.4632	0.4188	0.6035	0.5135	0.5333	0.46615
KNN	SVM	Genomic Subtype	50	RNA Seq	0.5965	0.5919	0.6415	0.6053	0.6314	0.568	0.6364	0.58665
MLP	LASSO	Genomic Subtype	10	miRNA	0.6074	0.5914	0.5092	0.476	0.5291	0.4162	0.5192	0.4461
Random Forest	LASSO	Genomic Subtype	50	miRNA	0.5917	0.5907	0.6664	0.6635	0.5963	0.5194	0.6314	0.59145
LightGBM	ANOVA F-test	Genomic Subtype	50	miRNA	0.59	0.5898	0.6742	0.6547	0.646	0.6072	0.6601	0.63095
GNN	SVM	Genomic Subtype	20	miRNA	0.5883	0.5894	0.5625	0.5452	0.5641	0.5183	0.5633	0.53175
KNN	LASSO	Genomic Subtype	100	miRNA	0.5925	0.5892	0.579	0.5921	0.553	0.5067	0.566	0.5494
Linear SVM	ANOVA F-test	Genomic Subtype	20	Methylation	0.5882	0.5882	0.4854	0.4628	0.5863	0.4606	0.5359	0.4617
KNN	ANOVA F-test	Genomic Subtype	20	RNA Seq	0.5952	0.5875	0.6245	0.6061	0.4943	0.4604	0.5594	0.53325
Random Forest	ANOVA F-test	Genomic Subtype	150	miRNA	0.5974	0.5874	0.6664	0.6499	0.7121	0.6507	0.6892	0.6503
Random Forest	SVM	Genomic Subtype	150	miRNA	0.5979	0.5868	0.7021	0.6846	0.6594	0.5651	0.6807	0.62485
GNN	ANOVA F-test	Genomic Subtype	50	Methylation	0.589	0.5832	0.5314	0.5037	0.6054	0.4956	0.5684	0.49965
LightGBM	ANOVA F-test	Genomic Subtype	100	miRNA	0.5843	0.5826	0.6374	0.6338	0.6231	0.5776	0.6302	0.6057
GNN	LASSO	Genomic Subtype	10	miRNA	0.589	0.5814	0.4927	0.4675	0.5069	0.4304	0.4998	0.44895
Random Forest	SVM	Genomic Subtype	100	miRNA	0.5785	0.5781	0.7078	0.7213	0.6733	0.6161	0.6905	0.6687
KNN	Random Forest	Genomic Subtype	200	RNA Seq	0.6119	0.578	0.6959	0.7118	0.7283	0.7512	0.7121	0.7315
GNN	ANOVA F-test	Genomic Subtype	20	miRNA	0.587	0.575	0.5909	0.5489	0.6644	0.5246	0.6277	0.53675
KNN	SVM	Genomic Subtype	10	Methylation	0.5681	0.5746	0.52	0.5067	0.4436	0.4038	0.4818	0.45525
LightGBM	Random Forest	Genomic Subtype	20	miRNA	0.5726	0.5741	0.6494	0.6269	0.6463	0.5771	0.6479	0.602
LightGBM	ANOVA F-test	Genomic Subtype	200	miRNA	0.5796	0.5732	0.714	0.7403	0.6438	0.6127	0.6789	0.6765
Random Forest	ANOVA F-test	Genomic Subtype	150	Methylation	0.5722	0.5705	0.6034	0.5615	0.5832	0.5033	0.5933	0.5324
Linear SVM	SVM	Genomic Subtype	10	RNA Seq	0.5573	0.57	0.5879	0.5734	0.5615	0.5066	0.5747	0.54
KNN	LASSO	Genomic Subtype	10	RNA Seq	0.5981	0.57	0.6074	0.5719	0.6215	0.5694	0.6145	0.57065
Random Forest	ANOVA F-test	Genomic Subtype	100	miRNA	0.5793	0.57	0.6318	0.6249	0.7281	0.678	0.68	0.65145
KNN	SVM	Genomic Subtype	50	Methylation	0.5678	0.5692	0.6591	0.6782	0.5773	0.5534	0.6182	0.6158
LightGBM	Random Forest	Genomic Subtype	10	miRNA	0.5651	0.5688	0.4927	0.479	0.5333	0.4311	0.513	0.45505
KNN	Random Forest	Genomic Subtype	100	miRNA	0.5705	0.5688	0.6494	0.6567	0.628	0.6119	0.6387	0.6343
LightGBM	ANOVA F-test	Genomic Subtype	200	Methylation	0.5668	0.5677	0.6618	0.6277	0.574	0.5276	0.6179	0.57765
Random Forest	Random Forest	Genomic Subtype	10	Methylation	0.5647	0.5672	0.5682	0.5373	0.5393	0.4851	0.5537	0.5112
MLP	ANOVA F-test	Genomic Subtype	20	Methylation	0.5583	0.5669	0.4418	0.4261	0.5518	0.4467	0.4968	0.4364
GNN	SVM	Genomic Subtype	10	RNA Seq	0.5817	0.5651	0.5823	0.5546	0.5557	0.5071	0.569	0.53085
GNN	ANOVA F-test	Genomic Subtype	20	Methylation	0.5598	0.5645	0.5614	0.5217	0.5655	0.4296	0.5635	0.47565
KNN	SVM	Genomic Subtype	150	RNA Seq	0.5958	0.5641	0.595	0.5545	0.6614	0.6146	0.6282	0.58455
KNN	LASSO	Genomic Subtype	50	miRNA	0.5532	0.5619	0.546	0.5358	0.573	0.5231	0.5595	0.52945
Random Forest	SVM	Genomic Subtype	200	miRNA	0.581	0.5612	0.6834	0.6546	0.6783	0.5751	0.6808	0.61485
LightGBM	ANOVA F-test	Genomic Subtype	50	Methylation	0.5594	0.5602	0.625	0.6087	0.5104	0.4502	0.5677	0.52945
LightGBM	Random Forest	Genomic Subtype	10	Methylation	0.5596	0.5602	0.5262	0.4977	0.5685	0.4933	0.5474	0.4955
Random Forest	SVM	Genomic Subtype	10	Methylation	0.5536	0.5572	0.5852	0.5451	0.591	0.5001	0.5881	0.5226
KNN	SVM	Genomic Subtype	20	Methylation	0.5555	0.5569	0.5319	0.5174	0.5682	0.5228	0.5501	0.5201
Random Forest	LASSO	Genomic Subtype	20	miRNA	0.5637	0.5559	0.5211	0.5074	0.4855	0.4037	0.5033	0.45555
Linear SVM	LASSO	Genomic Subtype	20	miRNA	0.5781	0.5557	0.5257	0.5112	0.4668	0.3893	0.4962	0.45025
Random Forest	ANOVA F-test	Genomic Subtype	50	miRNA	0.5597	0.555	0.6204	0.5984	0.6392	0.5728	0.6298	0.5856
GNN	SVM	Genomic Subtype	10	miRNA	0.5638	0.5523	0.4167	0.4046	0.4655	0.3977	0.4411	0.40115
MLP	ANOVA F-test	Genomic Subtype	20	miRNA	0.5643	0.5513	0.6323	0.5851	0.6376	0.4986	0.6349	0.54185
LightGBM	SVM	Genomic Subtype	20	miRNA	0.5491	0.5513	0.5024	0.4921	0.5505	0.479	0.5264	0.48555
Random Forest	Random Forest	Genomic Subtype	20	miRNA	0.5472	0.5485	0.6556	0.6475	0.6374	0.5424	0.6465	0.59495
Linear SVM	SVM	Genomic Subtype	10	miRNA	0.5643	0.5481	0.5211	0.5005	0.5613	0.464	0.5412	0.48225
Random Forest	SVM	Genomic Subtype	20	miRNA	0.543	0.5453	0.5092	0.5074	0.6246	0.5078	0.5669	0.5076
Linear SVM	Random Forest	Genomic Subtype	10	miRNA	0.5844	0.5411	0.5325	0.4833	0.6985	0.5216	0.6155	0.50245
Random Forest	ANOVA F-test	Genomic Subtype	50	Methylation	0.5375	0.5365	0.5858	0.5425	0.5093	0.4462	0.5475	0.49435
GNN	ANOVA F-test	Genomic Subtype	10	Methylation	0.5436	0.5364	0.4984	0.4346	0.4633	0.3846	0.4808	0.4096
KNN	SVM	Genomic Subtype	50	miRNA	0.5274	0.5358	0.5971	0.5927	0.5358	0.4664	0.5665	0.52955
MLP	LASSO	Genomic Subtype	10	Methylation	0.5405	0.5354	0.5373	0.5098	0.3957	0.3736	0.4665	0.4417
Linear SVM	SVM	Genomic Subtype	10	Methylation	0.553	0.5353	0.6231	0.5528	0.5664	0.5019	0.5948	0.52735
KNN	ANOVA F-test	Genomic Subtype	150	miRNA	0.5466	0.5348	0.6742	0.6844	0.6547	0.6406	0.6644	0.6625
KNN	Random Forest	Genomic Subtype	20	Methylation	0.5427	0.5336	0.5444	0.5245	0.6069	0.5752	0.5756	0.54985
Random Forest	Random Forest	Genomic Subtype	10	miRNA	0.535	0.5335	0.5858	0.5735	0.5614	0.4653	0.5736	0.5194
Random Forest	ANOVA F-test	Genomic Subtype	20	Methylation	0.5464	0.5335	0.5852	0.5413	0.5565	0.4321	0.5709	0.4867
MLP	ANOVA F-test	Genomic Subtype	10	Methylation	0.5336	0.5305	0.5046	0.4495	0.4343	0.3869	0.4695	0.4182
KNN	Random Forest	Genomic Subtype	50	miRNA	0.5431	0.5296	0.6845	0.7015	0.7199	0.6594	0.7022	0.68045
MLP	SVM	Genomic Subtype	10	miRNA	0.5278	0.5285	0.5238	0.4761	0.5063	0.4229	0.5151	0.4495
LightGBM	SVM	Genomic Subtype	10	miRNA	0.5286	0.5243	0.3674	0.3595	0.5504	0.469	0.4589	0.41425
Random Forest	SVM	Genomic Subtype	10	miRNA	0.5307	0.5243	0.3872	0.3676	0.5204	0.4608	0.4538	0.4142
LightGBM	ANOVA F-test	Genomic Subtype	100	Methylation	0.5324	0.5227	0.5557	0.5345	0.5601	0.5128	0.5579	0.52365
Linear SVM	ANOVA F-test	Genomic Subtype	20	miRNA	0.5445	0.5226	0.5909	0.5627	0.6814	0.5338	0.6361	0.54825
KNN	SVM	Genomic Subtype	10	RNA Seq	0.5227	0.5211	0.4938	0.4658	0.5498	0.4975	0.5218	0.48165
KNN	Random Forest	Genomic Subtype	150	miRNA	0.531	0.521	0.6664	0.6602	0.6478	0.6172	0.6571	0.6387
Linear SVM	ANOVA F-test	Genomic Subtype	10	Methylation	0.5249	0.5204	0.4337	0.3907	0.4585	0.3403	0.4461	0.3655
KNN	Random Forest	Genomic Subtype	10	miRNA	0.5176	0.5202	0.5676	0.5751	0.5345	0.5051	0.5511	0.5401
KNN	LASSO	Genomic Subtype	20	miRNA	0.5125	0.5139	0.5325	0.5226	0.5351	0.4796	0.5338	0.5011
KNN	ANOVA F-test	Genomic Subtype	100	miRNA	0.5234	0.5133	0.6017	0.6061	0.6373	0.5979	0.6195	0.602
KNN	SVM	Genomic Subtype	100	miRNA	0.5252	0.5131	0.5852	0.5726	0.6277	0.6071	0.6065	0.58985
Random Forest	ANOVA F-test	Genomic Subtype	10	Methylation	0.5488	0.5119	0.483	0.3887	0.4865	0.3216	0.4848	0.35515
KNN	Random Forest	Genomic Subtype	50	Methylation	0.5398	0.5117	0.6017	0.5942	0.621	0.6138	0.6114	0.604
KNN	LASSO	Genomic Subtype	10	Methylation	0.4954	0.5073	0.4859	0.4498	0.4715	0.4423	0.4787	0.44605
KNN	LASSO	Genomic Subtype	20	Methylation	0.5382	0.507	0.5365	0.5077	0.5063	0.4437	0.5214	0.4757
LightGBM	ANOVA F-test	Genomic Subtype	10	Methylation	0.5022	0.5057	0.4797	0.4458	0.5796	0.4718	0.5296	0.4588
KNN	ANOVA F-test	Genomic Subtype	20	miRNA	0.5065	0.5041	0.533	0.5284	0.6211	0.5451	0.5771	0.53675
LightGBM	ANOVA F-test	Genomic Subtype	20	Methylation	0.5038	0.5032	0.5133	0.5071	0.6557	0.5637	0.5845	0.5354
LightGBM	ANOVA F-test	Genomic Subtype	20	miRNA	0.5076	0.502	0.5262	0.5239	0.6933	0.6162	0.6098	0.57005
GNN	LASSO	Genomic Subtype	10	Methylation	0.5087	0.5019	0.4721	0.4555	0.4315	0.416	0.4518	0.43575
KNN	Random Forest	Genomic Subtype	200	miRNA	0.5141	0.5017	0.5603	0.5545	0.594	0.5618	0.5772	0.55815
KNN	SVM	Genomic Subtype	20	miRNA	0.4998	0.5016	0.4859	0.4649	0.5432	0.5103	0.5146	0.4876
KNN	ANOVA F-test	Genomic Subtype	50	Methylation	0.5219	0.4983	0.5593	0.5282	0.4712	0.4166	0.5152	0.4724
KNN	LASSO	Genomic Subtype	150	miRNA	0.506	0.4964	0.6153	0.6186	0.6039	0.5627	0.6096	0.59065
KNN	ANOVA F-test	Genomic Subtype	50	miRNA	0.5015	0.4938	0.6328	0.6261	0.6551	0.628	0.644	0.62705
Random Forest	LASSO	Genomic Subtype	10	Methylation	0.5089	0.492	0.5844	0.5368	0.5292	0.4815	0.5568	0.50915
KNN	ANOVA F-test	Genomic Subtype	150	Methylation	0.5161	0.4918	0.5495	0.5112	0.5391	0.4771	0.5443	0.49415
LightGBM	LASSO	Genomic Subtype	10	Methylation	0.5081	0.4918	0.5373	0.4971	0.5015	0.479	0.5194	0.48805
MLP	ANOVA F-test	Genomic Subtype	10	miRNA	0.5059	0.4893	0.5568	0.5076	0.5305	0.4313	0.5436	0.46945
KNN	ANOVA F-test	Genomic Subtype	200	miRNA	0.5119	0.4881	0.684	0.7042	0.6001	0.5827	0.6421	0.64345
KNN	ANOVA F-test	Genomic Subtype	100	Methylation	0.4932	0.4879	0.4832	0.4594	0.4685	0.4103	0.4758	0.43485
KNN	SVM	Genomic Subtype	150	miRNA	0.5119	0.4863	0.5427	0.5363	0.5101	0.4795	0.5264	0.5079
Linear SVM	ANOVA F-test	Genomic Subtype	10	miRNA	0.4925	0.4862	0.5568	0.4946	0.5796	0.4533	0.5682	0.47395
KNN	Random Forest	Genomic Subtype	10	Methylation	0.5032	0.4839	0.5097	0.4743	0.5799	0.5294	0.5448	0.50185
Linear SVM	LASSO	Genomic Subtype	10	Methylation	0.4889	0.4758	0.526	0.4797	0.4777	0.4466	0.5019	0.46315
KNN	ANOVA F-test	Genomic Subtype	200	Methylation	0.5017	0.474	0.5143	0.4578	0.538	0.4674	0.5262	0.4626
LightGBM	LASSO	Genomic Subtype	10	miRNA	0.4675	0.4731	0.4094	0.3937	0.4657	0.4313	0.4375	0.4125
Random Forest	ANOVA F-test	Genomic Subtype	100	Methylation	0.4921	0.4702	0.5647	0.4793	0.5662	0.4313	0.5655	0.4553
KNN	LASSO	Genomic Subtype	200	miRNA	0.495	0.4699	0.655	0.6966	0.5669	0.5196	0.6109	0.6081
KNN	LASSO	Genomic Subtype	10	miRNA	0.4894	0.4663	0.4502	0.388	0.3615	0.2629	0.4058	0.32545
Random Forest	ANOVA F-test	Genomic Subtype	20	miRNA	0.4747	0.4647	0.5257	0.5228	0.6561	0.5702	0.5909	0.5465
KNN	ANOVA F-test	Genomic Subtype	20	Methylation	0.4671	0.4545	0.536	0.509	0.4296	0.3807	0.4828	0.44485
Random Forest	LASSO	Genomic Subtype	10	miRNA	0.4632	0.4481	0.487	0.39	0.4832	0.3892	0.4851	0.3896
KNN	SVM	Genomic Subtype	10	miRNA	0.4406	0.4379	0.3877	0.3741	0.4256	0.4053	0.4066	0.3897
GNN	ANOVA F-test	Genomic Subtype	10	miRNA	0.4362	0.4334	0.4911	0.4719	0.5169	0.4056	0.504	0.43875
LightGBM	ANOVA F-test	Genomic Subtype	10	miRNA	0.4321	0.4318	0.5465	0.5289	0.6196	0.4912	0.5831	0.51005
KNN	SVM	Genomic Subtype	200	miRNA	0.444	0.4265	0.5666	0.5653	0.4964	0.4645	0.5315	0.5149
Random Forest	ANOVA F-test	Genomic Subtype	10	miRNA	0.4184	0.4201	0.4513	0.4344	0.5255	0.4232	0.4884	0.4288
KNN	ANOVA F-test	Genomic Subtype	10	Methylation	0.4347	0.4076	0.5154	0.4642	0.4362	0.3769	0.4758	0.42055
KNN	ANOVA F-test	Genomic Subtype	10	miRNA	0.4095	0.3996	0.444	0.4213	0.4344	0.3704	0.4392	0.39585

## Sheet: Supplementary Table-S6
Supplementary Table S6. Performance of multi-omics models for MSI status classification across all evaluation sets. Multi-omics model performance for binary MSI versus MSS classification using an integrated feature matrix combining mRNA expression, DNA methylation, and miRNA expression data. Results are reported for all combinations of model architecture, feature selection method (ANOVA, Random F…
Model	Feature Selection Method	Prediction Task	Number of Features	Validation Balanced Accuracy	Validation Macro F1 Score	Test Set 2 Balanced Accuracy	Test Set 2 Macro F1 Score	Test Set 3 Balanced Accuracy	Test Set 3 Macro F1 Score	Avg External Accuracy	Avg External Macro F1
LightGBM	SVM	MSI Status	20	0.9808	0.9808	0.9488	0.927	0.9306	0.9276	0.9397	0.9273
MLP	SVM	MSI Status	100	0.9748	0.9714	0.9077	0.852	0.8125	0.8125	0.8601	0.83225
LightGBM	LASSO	MSI Status	150	0.9677	0.971	0.9351	0.9007	0.8889	0.8862	0.912	0.89345
MLP	LASSO	MSI Status	100	0.9677	0.971	0.9214	0.8758	0.8264	0.8173	0.8739	0.84655
MLP	LASSO	MSI Status	150	0.9677	0.971	0.9145	0.8638	0.7708	0.7708	0.84265	0.8173
GNN	LASSO	MSI Status	100	0.9605	0.9706	0.9181	0.8977	0.8333	0.8403	0.8757	0.869
MLP	LASSO	MSI Status	200	0.9605	0.9706	0.9351	0.9007	0.8542	0.8542	0.89465	0.87745
MLP	SVM	MSI Status	150	0.9616	0.9616	0.9044	0.8723	0.8611	0.8561	0.88275	0.8642
Random Forest	SVM	MSI Status	20	0.9616	0.9616	0.9556	0.9407	0.8889	0.8943	0.92225	0.9175
Random Forest	LASSO	MSI Status	10	0.9616	0.9616	0.9693	0.9693	0.8958	0.9042	0.93255	0.93675
LightGBM	LASSO	MSI Status	200	0.9545	0.9611	0.9351	0.9007	0.8958	0.8958	0.91545	0.89825
LightGBM	Random Forest	MSI Status	100	0.9545	0.9611	0.9044	0.8723	0.8681	0.8732	0.88625	0.87275
LightGBM	LASSO	MSI Status	50	0.9545	0.9611	0.9351	0.9007	0.8958	0.8958	0.91545	0.89825
MLP	LASSO	MSI Status	50	0.9627	0.953	0.9351	0.9007	0.8958	0.8877	0.91545	0.8942
MLP	ANOVA F-test	MSI Status	20	0.9556	0.9524	0.9282	0.8881	0.8333	0.8333	0.88075	0.8607
LightGBM	LASSO	MSI Status	10	0.9556	0.9524	0.9113	0.8849	0.875	0.875	0.89315	0.87995
MLP	ANOVA F-test	MSI Status	150	0.9556	0.9524	0.9077	0.852	0.8194	0.8083	0.86355	0.83015
GNN	SVM	MSI Status	200	0.9556	0.9524	0.9419	0.9137	0.8264	0.8377	0.88415	0.8757
GNN	SVM	MSI Status	100	0.9556	0.9524	0.8907	0.8482	0.8125	0.8125	0.8516	0.83035
LightGBM	Random Forest	MSI Status	150	0.9485	0.9517	0.9419	0.9137	0.9167	0.9167	0.9293	0.9152
LightGBM	SVM	MSI Status	100	0.9485	0.9517	0.9282	0.8881	0.9097	0.8985	0.91895	0.8933
MLP	SVM	MSI Status	20	0.9485	0.9517	0.9351	0.9007	0.8681	0.8579	0.9016	0.8793
GNN	SVM	MSI Status	20	0.9485	0.9517	0.9488	0.927	0.8889	0.8862	0.91885	0.9066
Linear SVM	SVM	MSI Status	200	0.9485	0.9517	0.9113	0.8849	0.8542	0.8542	0.88275	0.86955
GNN	LASSO	MSI Status	50	0.9485	0.9517	0.9282	0.8881	0.8681	0.8503	0.89815	0.8692
LightGBM	Random Forest	MSI Status	200	0.9485	0.9517	0.9214	0.8758	0.8819	0.8767	0.90165	0.87625
GNN	LASSO	MSI Status	150	0.9485	0.9517	0.9145	0.8638	0.8194	0.8217	0.86695	0.84275
Linear SVM	LASSO	MSI Status	150	0.9485	0.9517	0.925	0.911	0.8264	0.8377	0.8757	0.87435
Linear SVM	LASSO	MSI Status	200	0.9485	0.9517	0.9012	0.8945	0.8611	0.8636	0.88115	0.87905
MLP	ANOVA F-test	MSI Status	200	0.9485	0.9517	0.9282	0.8881	0.7847	0.7886	0.85645	0.83835
Random Forest	LASSO	MSI Status	100	0.9413	0.951	0.9181	0.8977	0.8264	0.8377	0.87225	0.8677
MLP	SVM	MSI Status	50	0.9567	0.944	0.9214	0.8758	0.8958	0.8796	0.9086	0.8777
GNN	SVM	MSI Status	50	0.9496	0.9432	0.9077	0.852	0.8611	0.8486	0.8844	0.8503
LightGBM	SVM	MSI Status	150	0.9425	0.9425	0.9282	0.8881	0.9028	0.9056	0.9155	0.89685
Linear SVM	SVM	MSI Status	100	0.9425	0.9425	0.9488	0.927	0.8403	0.8498	0.89455	0.8884
GNN	SVM	MSI Status	150	0.9425	0.9425	0.9351	0.9007	0.8472	0.8521	0.89115	0.8764
LightGBM	LASSO	MSI Status	100	0.9425	0.9425	0.9282	0.8881	0.8542	0.8616	0.8912	0.87485
MLP	Random Forest	MSI Status	50	0.9425	0.9425	0.8976	0.8601	0.8819	0.8846	0.88975	0.87235
MLP	Random Forest	MSI Status	100	0.9425	0.9425	0.9008	0.8405	0.8681	0.8655	0.88445	0.853
Random Forest	LASSO	MSI Status	20	0.9353	0.9416	0.9419	0.9137	0.8819	0.8846	0.9119	0.89915
Linear SVM	LASSO	MSI Status	100	0.9353	0.9416	0.9387	0.9387	0.8333	0.8403	0.886	0.8895
MLP	SVM	MSI Status	200	0.9282	0.9407	0.8839	0.8365	0.875	0.8672	0.87945	0.85185
KNN	SVM	MSI Status	20	0.9282	0.9407	0.9113	0.8849	0.7847	0.8002	0.848	0.84255
MLP	LASSO	MSI Status	10	0.9436	0.9342	0.9145	0.8638	0.875	0.8595	0.89475	0.86165
MLP	SVM	MSI Status	10	0.9436	0.9342	0.9488	0.927	0.9306	0.9188	0.9397	0.9229
MLP	ANOVA F-test	MSI Status	10	0.9436	0.9342	0.9214	0.8758	0.8056	0.7838	0.8635	0.8298
GNN	Random Forest	MSI Status	50	0.9364	0.9333	0.8875	0.8685	0.8333	0.8403	0.8604	0.8544
MLP	ANOVA F-test	MSI Status	50	0.9364	0.9333	0.9077	0.852	0.875	0.8672	0.89135	0.8596
Linear SVM	LASSO	MSI Status	10	0.9364	0.9333	0.9488	0.927	0.8125	0.819	0.88065	0.873
Linear SVM	SVM	MSI Status	150	0.9364	0.9333	0.9113	0.8849	0.8889	0.8862	0.9001	0.88555
LightGBM	SVM	MSI Status	200	0.9364	0.9333	0.9282	0.8881	0.8819	0.8846	0.90505	0.88635
LightGBM	LASSO	MSI Status	20	0.9364	0.9333	0.9351	0.9007	0.9167	0.9081	0.9259	0.9044
Random Forest	SVM	MSI Status	10	0.9364	0.9333	0.9625	0.9548	0.875	0.8829	0.91875	0.91885
LightGBM	Random Forest	MSI Status	20	0.9293	0.9324	0.8907	0.8482	0.8681	0.8732	0.8794	0.8607
LightGBM	Random Forest	MSI Status	50	0.9293	0.9324	0.9044	0.8723	0.8889	0.8943	0.89665	0.8833
GNN	LASSO	MSI Status	200	0.9293	0.9324	0.9044	0.8723	0.8542	0.8616	0.8793	0.86695
Random Forest	SVM	MSI Status	50	0.9222	0.9313	0.925	0.911	0.8611	0.8712	0.89305	0.8911
MLP	Random Forest	MSI Status	200	0.9222	0.9313	0.9077	0.852	0.8889	0.8862	0.8983	0.8691
Random Forest	SVM	MSI Status	150	0.915	0.9302	0.9488	0.927	0.8333	0.8473	0.89105	0.88715
Random Forest	SVM	MSI Status	100	0.9079	0.929	0.8943	0.8813	0.8333	0.8473	0.8638	0.8643
MLP	Random Forest	MSI Status	20	0.9304	0.9243	0.894	0.8292	0.8194	0.815	0.8567	0.8221
GNN	SVM	MSI Status	10	0.9233	0.9233	0.9625	0.9548	0.9236	0.9178	0.94305	0.9363
Linear SVM	SVM	MSI Status	20	0.9233	0.9233	0.9556	0.9407	0.8681	0.8655	0.91185	0.9031
GNN	LASSO	MSI Status	10	0.9161	0.9221	0.9387	0.9387	0.8194	0.8217	0.87905	0.8802
GNN	ANOVA F-test	MSI Status	20	0.9161	0.9221	0.9008	0.8405	0.7847	0.7886	0.84275	0.81455
LightGBM	SVM	MSI Status	50	0.9161	0.9221	0.9282	0.8881	0.875	0.875	0.9016	0.88155
GNN	Random Forest	MSI Status	200	0.9161	0.9221	0.9351	0.9007	0.8194	0.8349	0.87725	0.8678
LightGBM	ANOVA F-test	MSI Status	200	0.9161	0.9221	0.9282	0.8881	0.9028	0.9056	0.9155	0.89685
Random Forest	ANOVA F-test	MSI Status	200	0.8947	0.9182	0.9693	0.9693	0.8194	0.8283	0.89435	0.8988
Random Forest	Random Forest	MSI Status	150	0.8947	0.9182	0.9318	0.9246	0.8333	0.8403	0.88255	0.88245
GNN	ANOVA F-test	MSI Status	10	0.9244	0.9154	0.9077	0.852	0.7986	0.775	0.85315	0.8135
MLP	LASSO	MSI Status	20	0.9172	0.9143	0.9282	0.8881	0.8542	0.8468	0.8912	0.86745
Linear SVM	ANOVA F-test	MSI Status	10	0.9172	0.9143	0.925	0.911	0.8472	0.8448	0.8861	0.8779
GNN	ANOVA F-test	MSI Status	100	0.9172	0.9143	0.8907	0.8482	0.8056	0.8098	0.84815	0.829
MLP	Random Forest	MSI Status	10	0.9101	0.9131	0.9214	0.8758	0.8333	0.8333	0.87735	0.85455
GNN	Random Forest	MSI Status	150	0.9101	0.9131	0.9282	0.8881	0.7847	0.7945	0.85645	0.8413
GNN	Random Forest	MSI Status	10	0.9101	0.9131	0.8806	0.8561	0.7917	0.7917	0.83615	0.8239
KNN	LASSO	MSI Status	10	0.9101	0.9131	0.9455	0.9532	0.8056	0.8161	0.87555	0.88465
GNN	Random Forest	MSI Status	20	0.9101	0.9131	0.9113	0.8849	0.8125	0.8255	0.8619	0.8552
MLP	Random Forest	MSI Status	150	0.903	0.9117	0.9077	0.852	0.875	0.875	0.89135	0.8635
Linear SVM	LASSO	MSI Status	50	0.903	0.9117	0.9387	0.9387	0.8333	0.8333	0.886	0.886
MLP	ANOVA F-test	MSI Status	100	0.8958	0.9103	0.9419	0.9137	0.8542	0.8616	0.89805	0.88765
Random Forest	LASSO	MSI Status	50	0.8958	0.9103	0.925	0.911	0.8403	0.857	0.88265	0.884
Random Forest	SVM	MSI Status	200	0.8958	0.9103	0.8976	0.8601	0.8403	0.8498	0.86895	0.85495
KNN	SVM	MSI Status	50	0.8887	0.9088	0.9181	0.8977	0.8125	0.8255	0.8653	0.8616
KNN	SVM	MSI Status	10	0.8887	0.9088	0.9625	0.9548	0.8542	0.8691	0.90835	0.91195
LightGBM	SVM	MSI Status	10	0.9184	0.9066	0.9044	0.8723	0.8958	0.8877	0.9001	0.88
GNN	LASSO	MSI Status	20	0.9112	0.9054	0.9351	0.9007	0.8403	0.8356	0.8877	0.86815
LightGBM	ANOVA F-test	MSI Status	10	0.9112	0.9054	0.9113	0.8849	0.7917	0.7855	0.8515	0.8352
LightGBM	ANOVA F-test	MSI Status	50	0.9112	0.9054	0.9181	0.8977	0.8681	0.881	0.8931	0.88935
Linear SVM	SVM	MSI Status	50	0.9041	0.9041	0.925	0.911	0.8264	0.8309	0.8757	0.87095
GNN	Random Forest	MSI Status	100	0.9041	0.9041	0.8565	0.7922	0.7778	0.7739	0.81715	0.78305
KNN	ANOVA F-test	MSI Status	20	0.9041	0.9041	0.8907	0.8482	0.8056	0.8034	0.84815	0.8258
GNN	ANOVA F-test	MSI Status	50	0.9041	0.9041	0.9419	0.9137	0.8681	0.8732	0.905	0.89345
LightGBM	Random Forest	MSI Status	10	0.9041	0.9041	0.9044	0.8723	0.8194	0.815	0.8619	0.84365
GNN	ANOVA F-test	MSI Status	200	0.897	0.9027	0.8839	0.8365	0.8194	0.8217	0.85165	0.8291
LightGBM	ANOVA F-test	MSI Status	150	0.897	0.9027	0.9351	0.9007	0.8264	0.8377	0.88075	0.8692
Random Forest	ANOVA F-test	MSI Status	20	0.897	0.9027	0.9387	0.9387	0.8472	0.8521	0.89295	0.8954
Linear SVM	Random Forest	MSI Status	50	0.897	0.9027	0.9488	0.927	0.8542	0.8691	0.9015	0.89805
KNN	ANOVA F-test	MSI Status	50	0.897	0.9027	0.8875	0.8685	0.7917	0.8036	0.8396	0.83605
Random Forest	LASSO	MSI Status	200	0.897	0.9027	0.9282	0.8881	0.8056	0.8161	0.8669	0.8521
Random Forest	Random Forest	MSI Status	20	0.897	0.9027	0.9351	0.9007	0.8264	0.8377	0.88075	0.8692
Random Forest	ANOVA F-test	MSI Status	50	0.8898	0.9011	0.9693	0.9693	0.8056	0.8161	0.88745	0.8927
Random Forest	Random Forest	MSI Status	10	0.8898	0.9011	0.8875	0.8685	0.8264	0.8377	0.85695	0.8531
Linear SVM	ANOVA F-test	MSI Status	20	0.8898	0.9011	0.9282	0.8881	0.8333	0.8403	0.88075	0.8642
Random Forest	LASSO	MSI Status	150	0.8898	0.9011	0.925	0.911	0.7986	0.819	0.8618	0.865
KNN	LASSO	MSI Status	20	0.8827	0.8995	0.9625	0.9548	0.7917	0.8036	0.8771	0.8792
Random Forest	ANOVA F-test	MSI Status	100	0.8827	0.8995	0.9556	0.9407	0.8264	0.8309	0.891	0.8858
Linear SVM	ANOVA F-test	MSI Status	200	0.8827	0.8995	0.9351	0.9007	0.8681	0.8732	0.9016	0.88695
Linear SVM	ANOVA F-test	MSI Status	150	0.8827	0.8995	0.9419	0.9137	0.8264	0.8377	0.88415	0.8757
Random Forest	Random Forest	MSI Status	100	0.8827	0.8995	0.9387	0.9387	0.8333	0.8403	0.886	0.8895
Random Forest	ANOVA F-test	MSI Status	150	0.8827	0.8995	0.9387	0.9387	0.8194	0.8283	0.87905	0.8835
Linear SVM	Random Forest	MSI Status	200	0.8756	0.8977	0.9181	0.8977	0.7917	0.8036	0.8549	0.85065
Linear SVM	LASSO	MSI Status	20	0.9052	0.8966	0.9488	0.927	0.8403	0.8426	0.89455	0.8848
LightGBM	ANOVA F-test	MSI Status	100	0.8981	0.8952	0.9113	0.8849	0.8194	0.8349	0.86535	0.8599
Linear SVM	SVM	MSI Status	10	0.8909	0.8937	0.9181	0.8977	0.875	0.8672	0.89655	0.88245
KNN	Random Forest	MSI Status	20	0.8838	0.8921	0.877	0.8251	0.8194	0.8217	0.8482	0.8234
KNN	Random Forest	MSI Status	150	0.8767	0.8904	0.8839	0.8365	0.7708	0.7871	0.82735	0.8118
Linear SVM	Random Forest	MSI Status	100	0.8767	0.8904	0.9419	0.9137	0.8333	0.8403	0.8876	0.877
KNN	Random Forest	MSI Status	100	0.8695	0.8885	0.9181	0.8977	0.7778	0.7964	0.84795	0.84705
LightGBM	ANOVA F-test	MSI Status	20	0.8992	0.888	0.8976	0.8601	0.875	0.875	0.8863	0.86755
GNN	ANOVA F-test	MSI Status	150	0.892	0.8865	0.8735	0.7965	0.7778	0.7739	0.82565	0.7852
KNN	LASSO	MSI Status	150	0.8624	0.8865	0.925	0.911	0.7847	0.8058	0.85485	0.8584
Random Forest	ANOVA F-test	MSI Status	10	0.8849	0.8849	0.9419	0.9137	0.8125	0.8125	0.8772	0.8631
Linear SVM	ANOVA F-test	MSI Status	50	0.8778	0.8832	0.9625	0.9548	0.8264	0.8309	0.89445	0.89285
Linear SVM	Random Forest	MSI Status	150	0.8635	0.8794	0.9556	0.9407	0.7986	0.8129	0.8771	0.8768
Random Forest	Random Forest	MSI Status	50	0.8635	0.8794	0.9012	0.8945	0.8542	0.8691	0.8777	0.8818
KNN	SVM	MSI Status	200	0.8564	0.8773	0.9012	0.8945	0.7708	0.7923	0.836	0.8434
KNN	SVM	MSI Status	100	0.8492	0.875	0.9181	0.8977	0.7917	0.8095	0.8549	0.8536
Linear SVM	Random Forest	MSI Status	20	0.8646	0.8725	0.9351	0.9007	0.8194	0.8283	0.87725	0.8645
Linear SVM	Random Forest	MSI Status	10	0.8646	0.8725	0.9282	0.8881	0.7847	0.7945	0.85645	0.8413
KNN	ANOVA F-test	MSI Status	100	0.8503	0.8682	0.8467	0.8467	0.7361	0.7552	0.7914	0.80095
KNN	LASSO	MSI Status	100	0.8361	0.8633	0.9181	0.8977	0.7778	0.7964	0.84795	0.84705
KNN	Random Forest	MSI Status	10	0.8443	0.8593	0.8875	0.8685	0.7847	0.8002	0.8361	0.83435
KNN	LASSO	MSI Status	50	0.8372	0.8568	0.9419	0.9137	0.8264	0.8377	0.88415	0.8757
KNN	ANOVA F-test	MSI Status	10	0.8372	0.8568	0.9113	0.8849	0.8056	0.8161	0.85845	0.8505
KNN	Random Forest	MSI Status	200	0.8372	0.8568	0.8193	0.7985	0.7708	0.7871	0.79505	0.7928
KNN	LASSO	MSI Status	200	0.8301	0.8542	0.925	0.911	0.7639	0.783	0.84445	0.847
KNN	Random Forest	MSI Status	50	0.8301	0.8542	0.8842	0.8908	0.7431	0.7643	0.81365	0.82755
Linear SVM	ANOVA F-test	MSI Status	100	0.8383	0.8505	0.9351	0.9007	0.8264	0.8377	0.88075	0.8692
KNN	ANOVA F-test	MSI Status	200	0.8312	0.848	0.9181	0.8977	0.7569	0.7738	0.8375	0.83575
Random Forest	Random Forest	MSI Status	200	0.8312	0.848	0.8637	0.8516	0.7778	0.7964	0.82075	0.824
KNN	SVM	MSI Status	150	0.8169	0.8422	0.8911	0.9047	0.7708	0.7923	0.83095	0.8485
KNN	ANOVA F-test	MSI Status	150	0.8049	0.8246	0.9181	0.8977	0.7222	0.7407	0.82015	0.8192

## Sheet: Supplementary Table-S7
Supplementary Table S7. Performance of multi-omics models for genomic subtype classification across all evaluation sets. Multi-omics model performance for four-class genomic subtype classification (CNV-High, CNV-Low, MSI, and POLE) using an integrated feature matrix combining mRNA expression, DNA methylation, and miRNA expression data. Results are reported for all combinations of model architectu…
Model	Feature Selection Method	Prediction Task	Number of Features	Validation Balanced Accuracy	Validation Macro F1 Score	Test Set 2 Balanced Accuracy	Test Set 2 Macro F1 Score	Test Set 3 Balanced Accuracy	Test Set 3 Macro F1 Score	Avg External Accuracy	Avg External Macro F1
MLP	LASSO	Genomic Subtype	50	0.8911	0.8723	0.8615	0.8338	0.8472	0.7545	0.85435	0.79415
MLP	SVM	Genomic Subtype	200	0.8727	0.8649	0.7384	0.737	0.8306	0.7314	0.7845	0.7342
MLP	LASSO	Genomic Subtype	150	0.8633	0.8573	0.8025	0.8123	0.7758	0.6708	0.78915	0.74155
MLP	LASSO	Genomic Subtype	100	0.8464	0.8565	0.8252	0.8407	0.8158	0.7576	0.8205	0.79915
MLP	LASSO	Genomic Subtype	200	0.8517	0.8564	0.7838	0.7762	0.7938	0.7235	0.7888	0.74985
MLP	SVM	Genomic Subtype	50	0.8383	0.856	0.7787	0.7502	0.8246	0.7406	0.80165	0.7454
Linear SVM	SVM	Genomic Subtype	100	0.8293	0.8459	0.7714	0.7959	0.7925	0.7897	0.78195	0.7928
GNN	SVM	Genomic Subtype	50	0.8165	0.8392	0.7486	0.7453	0.8033	0.7485	0.77595	0.7469
MLP	SVM	Genomic Subtype	150	0.8187	0.8385	0.8206	0.8032	0.7686	0.7055	0.7946	0.75435
Linear SVM	SVM	Genomic Subtype	50	0.817	0.8384	0.8128	0.8209	0.8456	0.8188	0.8292	0.81985
LightGBM	LASSO	Genomic Subtype	100	0.8181	0.8348	0.8014	0.8295	0.8296	0.7646	0.8155	0.79705
Linear SVM	LASSO	Genomic Subtype	50	0.8141	0.8321	0.79	0.8241	0.7866	0.7711	0.7883	0.7976
MLP	Random Forest	Genomic Subtype	200	0.817	0.8309	0.7911	0.7675	0.8058	0.7281	0.79845	0.7478
MLP	SVM	Genomic Subtype	100	0.8226	0.8304	0.7917	0.7685	0.7975	0.7455	0.7946	0.757
GNN	SVM	Genomic Subtype	100	0.8126	0.8302	0.7895	0.7942	0.8083	0.7708	0.7989	0.7825
Linear SVM	LASSO	Genomic Subtype	200	0.8152	0.83	0.8009	0.8191	0.8336	0.7938	0.81725	0.80645
Linear SVM	LASSO	Genomic Subtype	150	0.8152	0.83	0.7776	0.8007	0.8186	0.7653	0.7981	0.783
LightGBM	LASSO	Genomic Subtype	150	0.8215	0.8286	0.7957	0.8111	0.8066	0.7995	0.80115	0.8053
LightGBM	SVM	Genomic Subtype	200	0.8081	0.8284	0.8071	0.82	0.8466	0.8209	0.82685	0.82045
LightGBM	SVM	Genomic Subtype	100	0.8152	0.8263	0.7787	0.7828	0.8744	0.8744	0.82655	0.8286
GNN	LASSO	Genomic Subtype	150	0.8037	0.8191	0.819	0.8166	0.8425	0.8015	0.83075	0.80905
MLP	Random Forest	Genomic Subtype	150	0.8112	0.8181	0.8019	0.7859	0.7488	0.6982	0.77535	0.74205
Linear SVM	SVM	Genomic Subtype	200	0.7939	0.8179	0.819	0.8435	0.7647	0.7626	0.79185	0.80305
Linear SVM	LASSO	Genomic Subtype	100	0.8013	0.8162	0.7895	0.8098	0.8406	0.8277	0.81505	0.81875
Linear SVM	SVM	Genomic Subtype	150	0.7934	0.8162	0.79	0.8216	0.7717	0.7663	0.78085	0.79395
LightGBM	Random Forest	Genomic Subtype	100	0.8011	0.8154	0.8071	0.838	0.7796	0.7488	0.79335	0.7934
MLP	Random Forest	Genomic Subtype	100	0.8309	0.8153	0.7725	0.7591	0.7936	0.6803	0.78305	0.7197
GNN	SVM	Genomic Subtype	200	0.7918	0.8149	0.73	0.7226	0.7283	0.6772	0.72915	0.6999
LightGBM	LASSO	Genomic Subtype	20	0.7937	0.8148	0.71	0.7077	0.7844	0.7498	0.7472	0.72875
Linear SVM	Random Forest	Genomic Subtype	50	0.796	0.8126	0.8479	0.8663	0.8386	0.7711	0.84325	0.8187
GNN	LASSO	Genomic Subtype	100	0.8149	0.811	0.7968	0.7622	0.7506	0.6987	0.7737	0.73045
LightGBM	Random Forest	Genomic Subtype	200	0.8065	0.8088	0.79	0.7979	0.7727	0.7326	0.78135	0.76525
GNN	LASSO	Genomic Subtype	200	0.8015	0.8087	0.8019	0.7949	0.8227	0.7553	0.8123	0.7751
MLP	LASSO	Genomic Subtype	20	0.7973	0.8056	0.7156	0.6958	0.8292	0.7829	0.7724	0.73935
GNN	SVM	Genomic Subtype	150	0.7801	0.8027	0.7073	0.7055	0.7755	0.7532	0.7414	0.72935
LightGBM	SVM	Genomic Subtype	150	0.7872	0.8024	0.7844	0.7816	0.7574	0.7634	0.7709	0.7725
Random Forest	SVM	Genomic Subtype	100	0.7821	0.7977	0.7781	0.7749	0.7596	0.7169	0.76885	0.7459
GNN	LASSO	Genomic Subtype	50	0.7899	0.794	0.7389	0.7331	0.7253	0.6566	0.7321	0.69485
GNN	Random Forest	Genomic Subtype	20	0.7746	0.79	0.8247	0.8241	0.7967	0.6854	0.8107	0.75475
LightGBM	SVM	Genomic Subtype	20	0.7805	0.7894	0.6886	0.6702	0.7916	0.7586	0.7401	0.7144
MLP	Random Forest	Genomic Subtype	50	0.7978	0.7891	0.7838	0.7784	0.7958	0.7007	0.7898	0.73955
LightGBM	LASSO	Genomic Subtype	200	0.7792	0.7883	0.7543	0.7676	0.7916	0.7551	0.77295	0.76135
LightGBM	Random Forest	Genomic Subtype	50	0.7868	0.7869	0.8071	0.8251	0.8396	0.7935	0.82335	0.8093
Linear SVM	Random Forest	Genomic Subtype	150	0.7774	0.7848	0.7595	0.7763	0.7886	0.7529	0.77405	0.7646
GNN	Random Forest	Genomic Subtype	200	0.7936	0.7841	0.79	0.7826	0.7419	0.6553	0.76595	0.71895
MLP	SVM	Genomic Subtype	20	0.7847	0.7825	0.6861	0.662	0.7933	0.7159	0.7397	0.68895
Random Forest	SVM	Genomic Subtype	150	0.7555	0.7823	0.7968	0.7738	0.7556	0.6807	0.7762	0.72725
LightGBM	Random Forest	Genomic Subtype	20	0.7722	0.7791	0.7838	0.7744	0.7696	0.7169	0.7767	0.74565
Linear SVM	Random Forest	Genomic Subtype	100	0.759	0.7775	0.7895	0.8055	0.7817	0.7549	0.7856	0.7802
LightGBM	LASSO	Genomic Subtype	50	0.7608	0.7774	0.803	0.7889	0.7875	0.7341	0.79525	0.7615
LightGBM	SVM	Genomic Subtype	50	0.7554	0.7761	0.7771	0.7894	0.8035	0.7893	0.7903	0.78935
MLP	ANOVA F-test	Genomic Subtype	150	0.7637	0.7757	0.7968	0.7644	0.7177	0.7036	0.75725	0.734
Random Forest	LASSO	Genomic Subtype	100	0.7548	0.7727	0.7957	0.8174	0.7866	0.7848	0.79115	0.8011
GNN	LASSO	Genomic Subtype	20	0.7587	0.7726	0.7503	0.7307	0.7903	0.7242	0.7703	0.72745
LightGBM	Random Forest	Genomic Subtype	150	0.7705	0.7718	0.7957	0.7943	0.7925	0.7423	0.7941	0.7683
GNN	SVM	Genomic Subtype	20	0.7621	0.7715	0.6602	0.6442	0.7083	0.6713	0.68425	0.65775
Random Forest	SVM	Genomic Subtype	50	0.7468	0.7714	0.8485	0.8523	0.8044	0.7635	0.82645	0.8079
Linear SVM	SVM	Genomic Subtype	20	0.7595	0.7714	0.6943	0.6824	0.7083	0.6692	0.7013	0.6758
GNN	ANOVA F-test	Genomic Subtype	50	0.7583	0.7707	0.6948	0.6902	0.656	0.5933	0.6754	0.64175
MLP	ANOVA F-test	Genomic Subtype	50	0.7577	0.7689	0.8014	0.7978	0.6838	0.6425	0.7426	0.72015
MLP	Random Forest	Genomic Subtype	10	0.7652	0.7655	0.7503	0.714	0.6608	0.5886	0.70555	0.6513
MLP	ANOVA F-test	Genomic Subtype	100	0.7537	0.7654	0.7497	0.7389	0.7169	0.698	0.7333	0.71845
Linear SVM	LASSO	Genomic Subtype	20	0.7532	0.7648	0.7684	0.7351	0.7955	0.7766	0.78195	0.75585
GNN	Random Forest	Genomic Subtype	150	0.7555	0.763	0.79	0.7932	0.7078	0.6673	0.7489	0.73025
MLP	ANOVA F-test	Genomic Subtype	20	0.7569	0.7626	0.7968	0.7723	0.7319	0.6541	0.76435	0.7132
Linear SVM	Random Forest	Genomic Subtype	200	0.7485	0.761	0.7662	0.7762	0.8208	0.7992	0.7935	0.7877
KNN	LASSO	Genomic Subtype	50	0.739	0.7568	0.79	0.8175	0.7653	0.7609	0.77765	0.7892
MLP	SVM	Genomic Subtype	10	0.7491	0.7562	0.714	0.6916	0.6494	0.6022	0.6817	0.6469
Random Forest	SVM	Genomic Subtype	20	0.7368	0.7528	0.6296	0.5975	0.7306	0.7022	0.6801	0.64985
GNN	LASSO	Genomic Subtype	10	0.7492	0.75	0.7735	0.7668	0.7244	0.6859	0.74895	0.72635
LightGBM	LASSO	Genomic Subtype	10	0.7387	0.7492	0.7503	0.7478	0.7664	0.6871	0.75835	0.71745
GNN	ANOVA F-test	Genomic Subtype	200	0.7358	0.7487	0.7316	0.7056	0.718	0.6324	0.7248	0.669
Linear SVM	ANOVA F-test	Genomic Subtype	100	0.7334	0.7466	0.7311	0.7294	0.7227	0.6933	0.7269	0.71135
MLP	Random Forest	Genomic Subtype	20	0.7434	0.7464	0.727	0.7069	0.8408	0.7137	0.7839	0.7103
MLP	ANOVA F-test	Genomic Subtype	200	0.7466	0.7452	0.7792	0.7365	0.706	0.6301	0.7426	0.6833
GNN	Random Forest	Genomic Subtype	50	0.7295	0.7451	0.8133	0.8039	0.8167	0.7285	0.815	0.7662
Random Forest	ANOVA F-test	Genomic Subtype	100	0.7408	0.7445	0.8195	0.7984	0.6838	0.633	0.75165	0.7157
Linear SVM	ANOVA F-test	Genomic Subtype	50	0.7361	0.7441	0.79	0.7945	0.7058	0.6673	0.7479	0.7309
KNN	LASSO	Genomic Subtype	150	0.7254	0.7429	0.7957	0.8086	0.7014	0.6748	0.74855	0.7417
GNN	Random Forest	Genomic Subtype	100	0.7416	0.7416	0.7849	0.7713	0.7527	0.6892	0.7688	0.73025
Random Forest	Random Forest	Genomic Subtype	50	0.7323	0.7407	0.8003	0.7961	0.7219	0.6511	0.7611	0.7236
Random Forest	ANOVA F-test	Genomic Subtype	150	0.735	0.7397	0.7776	0.7689	0.6838	0.6307	0.7307	0.6998
KNN	LASSO	Genomic Subtype	100	0.7268	0.7385	0.7254	0.7387	0.7653	0.7651	0.74535	0.7519
Linear SVM	Random Forest	Genomic Subtype	20	0.7195	0.7383	0.8309	0.8264	0.7906	0.742	0.81075	0.7842
Random Forest	ANOVA F-test	Genomic Subtype	200	0.7269	0.7375	0.7963	0.7863	0.6988	0.6571	0.74755	0.7217
LightGBM	ANOVA F-test	Genomic Subtype	200	0.7385	0.737	0.8195	0.8298	0.7656	0.7092	0.79255	0.7695
Random Forest	SVM	Genomic Subtype	200	0.7102	0.7365	0.8065	0.8181	0.8027	0.7205	0.8046	0.7693
Random Forest	LASSO	Genomic Subtype	10	0.7434	0.7359	0.7219	0.7128	0.6896	0.6231	0.70575	0.66795
GNN	SVM	Genomic Subtype	10	0.7278	0.7351	0.6675	0.6464	0.7292	0.6973	0.69835	0.67185
GNN	ANOVA F-test	Genomic Subtype	100	0.7116	0.7349	0.7129	0.7252	0.6767	0.6451	0.6948	0.68515
Random Forest	LASSO	Genomic Subtype	20	0.7164	0.7336	0.7384	0.7493	0.7477	0.7346	0.74305	0.74195
KNN	Random Forest	Genomic Subtype	50	0.7132	0.7314	0.7838	0.7965	0.7886	0.7578	0.7862	0.77715
MLP	LASSO	Genomic Subtype	10	0.7405	0.7301	0.7321	0.7206	0.8005	0.6892	0.7663	0.7049
Random Forest	ANOVA F-test	Genomic Subtype	20	0.7269	0.7288	0.7554	0.7277	0.801	0.6836	0.7782	0.70565
Random Forest	LASSO	Genomic Subtype	150	0.7045	0.7277	0.8071	0.8263	0.7027	0.6797	0.7549	0.753
Random Forest	Random Forest	Genomic Subtype	10	0.7265	0.7271	0.7611	0.7588	0.7977	0.7218	0.7794	0.7403
Random Forest	Random Forest	Genomic Subtype	100	0.7017	0.7264	0.7362	0.761	0.6508	0.6241	0.6935	0.69255
GNN	Random Forest	Genomic Subtype	10	0.7444	0.7259	0.8139	0.7839	0.8288	0.7037	0.82135	0.7438
Linear SVM	Random Forest	Genomic Subtype	10	0.7143	0.7249	0.7316	0.7281	0.7338	0.6657	0.7327	0.6969
LightGBM	Random Forest	Genomic Subtype	10	0.7138	0.7243	0.8258	0.8148	0.7506	0.686	0.7882	0.7504
LightGBM	ANOVA F-test	Genomic Subtype	150	0.7224	0.7235	0.8009	0.8083	0.6844	0.6513	0.74265	0.7298
Linear SVM	ANOVA F-test	Genomic Subtype	200	0.7182	0.723	0.7952	0.7837	0.733	0.6752	0.7641	0.72945
GNN	ANOVA F-test	Genomic Subtype	150	0.7172	0.7225	0.7503	0.7078	0.725	0.6264	0.73765	0.6671
Random Forest	ANOVA F-test	Genomic Subtype	50	0.7194	0.718	0.7611	0.7551	0.776	0.7083	0.76855	0.7317
Random Forest	Random Forest	Genomic Subtype	20	0.7021	0.7176	0.7606	0.7544	0.7686	0.7091	0.7646	0.73175
Random Forest	Random Forest	Genomic Subtype	200	0.6959	0.7141	0.7486	0.7557	0.6888	0.6677	0.7187	0.7117
Random Forest	LASSO	Genomic Subtype	50	0.7033	0.7131	0.8485	0.8669	0.7566	0.7041	0.80255	0.7855
Linear SVM	ANOVA F-test	Genomic Subtype	150	0.7051	0.7117	0.7725	0.7644	0.683	0.6486	0.72775	0.7065
LightGBM	ANOVA F-test	Genomic Subtype	100	0.7062	0.7112	0.7357	0.7423	0.7177	0.6993	0.7267	0.7208
MLP	ANOVA F-test	Genomic Subtype	10	0.7166	0.7107	0.6794	0.6602	0.6749	0.5722	0.67715	0.6162
Linear SVM	ANOVA F-test	Genomic Subtype	20	0.7067	0.7101	0.819	0.7993	0.671	0.634	0.745	0.71665
Linear SVM	SVM	Genomic Subtype	10	0.6952	0.7084	0.7073	0.687	0.6333	0.5746	0.6703	0.6308
Random Forest	Random Forest	Genomic Subtype	150	0.698	0.7078	0.73	0.7419	0.7388	0.6704	0.7344	0.70615
GNN	ANOVA F-test	Genomic Subtype	20	0.6901	0.7071	0.7554	0.7315	0.6858	0.633	0.7206	0.68225
LightGBM	ANOVA F-test	Genomic Subtype	50	0.7062	0.7053	0.8014	0.8338	0.7177	0.6846	0.75955	0.7592
Random Forest	LASSO	Genomic Subtype	200	0.6838	0.695	0.8185	0.8446	0.7377	0.7297	0.7781	0.78715
KNN	Random Forest	Genomic Subtype	150	0.6836	0.6918	0.7362	0.7524	0.7586	0.7576	0.7474	0.755
GNN	ANOVA F-test	Genomic Subtype	10	0.6871	0.6918	0.684	0.6512	0.6458	0.5759	0.6649	0.61355
KNN	LASSO	Genomic Subtype	200	0.6828	0.6873	0.7668	0.7871	0.7544	0.7537	0.7606	0.7704
KNN	Random Forest	Genomic Subtype	20	0.6687	0.6778	0.79	0.8113	0.7975	0.7607	0.79375	0.786
KNN	Random Forest	Genomic Subtype	200	0.6704	0.6775	0.7476	0.7726	0.7536	0.7385	0.7506	0.75555
KNN	SVM	Genomic Subtype	50	0.6741	0.6762	0.688	0.6821	0.7203	0.7066	0.70415	0.69435
KNN	SVM	Genomic Subtype	10	0.6795	0.6745	0.6545	0.6527	0.6757	0.6749	0.6651	0.6638
LightGBM	ANOVA F-test	Genomic Subtype	20	0.6693	0.6713	0.743	0.7408	0.6829	0.6484	0.71295	0.6946
KNN	SVM	Genomic Subtype	20	0.6525	0.6632	0.6659	0.6643	0.7614	0.7523	0.71365	0.7083
KNN	LASSO	Genomic Subtype	20	0.6549	0.6592	0.7357	0.7518	0.8094	0.8106	0.77255	0.7812
Linear SVM	LASSO	Genomic Subtype	10	0.669	0.6551	0.7746	0.7457	0.7896	0.6777	0.7821	0.7117
Linear SVM	ANOVA F-test	Genomic Subtype	10	0.653	0.6508	0.7332	0.681	0.6571	0.5624	0.69515	0.6217
Random Forest	ANOVA F-test	Genomic Subtype	10	0.6436	0.648	0.7424	0.75	0.649	0.6232	0.6957	0.6866
LightGBM	SVM	Genomic Subtype	10	0.6408	0.6429	0.6199	0.6053	0.6846	0.6222	0.65225	0.61375
Random Forest	SVM	Genomic Subtype	10	0.6397	0.6397	0.6234	0.6012	0.7177	0.6968	0.67055	0.649
LightGBM	ANOVA F-test	Genomic Subtype	10	0.627	0.6275	0.7016	0.6987	0.604	0.5356	0.6528	0.61715
KNN	Random Forest	Genomic Subtype	10	0.6078	0.615	0.79	0.7791	0.7077	0.6706	0.74885	0.72485
KNN	Random Forest	Genomic Subtype	100	0.616	0.6142	0.76	0.7838	0.7728	0.7244	0.7664	0.7541
KNN	SVM	Genomic Subtype	150	0.6265	0.6131	0.641	0.6155	0.6994	0.6769	0.6702	0.6462
KNN	LASSO	Genomic Subtype	10	0.6225	0.6125	0.6472	0.6027	0.6325	0.5775	0.63985	0.5901
KNN	ANOVA F-test	Genomic Subtype	50	0.601	0.604	0.7186	0.7323	0.6869	0.6509	0.70275	0.6916
KNN	SVM	Genomic Subtype	200	0.6131	0.6014	0.6596	0.6652	0.6825	0.6624	0.67105	0.6638
KNN	ANOVA F-test	Genomic Subtype	10	0.5847	0.5864	0.7016	0.6875	0.621	0.6038	0.6613	0.64565
KNN	ANOVA F-test	Genomic Subtype	200	0.5865	0.586	0.654	0.6672	0.6469	0.6284	0.65045	0.6478
KNN	ANOVA F-test	Genomic Subtype	100	0.5858	0.5747	0.73	0.7649	0.7167	0.6946	0.72335	0.72975
KNN	ANOVA F-test	Genomic Subtype	150	0.5744	0.5746	0.6653	0.675	0.6419	0.6334	0.6536	0.6542
KNN	SVM	Genomic Subtype	100	0.6051	0.5742	0.6182	0.5923	0.7283	0.7249	0.67325	0.6586
KNN	ANOVA F-test	Genomic Subtype	20	0.5645	0.5398	0.7838	0.8024	0.666	0.6466	0.7249	0.7245

## Sheet: Supplementary Table-S8
Supplementary Table S8. SHAP feature importance scores for the MSI status classification model. Mean absolute SHAP (SHapley Additive exPlanations) values for each feature in the top-performing LightGBM MSI classifier, computed across all samples in the combined external test sets (Set-2 and Set-3). Features are annotated by molecular data type: R denotes mRNA expression (RNA-seq) and D denotes DN…
Feature	Importance
MLH1 (R)	0.996455
C3orf63 (D)	0.956853
PTMAP4 (R)	0.743144
AC245407.1 (R)	0.705037
RNLS (R)	0.525144
KDM2B (D)	0.485162
HIST1H2BI (D)	0.477871
CHRNB1 (D)	0.308768
SEC31B (D)	0.298769
HENMT1 (R)	0.279431
MSH4 (R)	0.274565
LYG1 (R)	0.26368
PCP4L1 (D)	0.258257
RPL22P24 (R)	0.256084
EPM2AIP1 (R)	0.254104
GAMT (R)	0.22439
hsa-mir-1294 (M)	0.22387
hsa-mir-132 (M)	0.215445
AC007537.1 (R)	0.21469
C10orf99 (D)	0.196439
RPL22L1 (R)	0.166681
hsa-mir-3913 (M)	0.136922
AC010975.1 (R)	0.135822
AC087343.1 (R)	0.108929
hsa-mir-708 (M)	0.104977
hsa-mir-26b (M)	0.090469
NPHS1 (D)	0.0902882
TNFAIP8L3 (D)	0.0815275
hsa-mir-1305 (M)	0.0814792
AL590139.1 (R)	0.0659094
COL3A1 (D)	0.0592435
KCNK2 (D)	0.0545836
hsa-mir-210 (M)	0.0526887
PRSS3 (D)	0.0488725
hsa-mir-4787 (M)	0.0461084
ABCB11 (D)	0.0424007
H3F3AP6 (R)	0.0408015
C4orf37 (D)	0.0389803
hsa-mir-1296 (M)	0.0386829
C21orf54 (D)	0.0356721
hsa-mir-5696 (M)	0.032863
hsa-mir-520b (M)	0.030565
hsa-mir-155 (M)	0.0280562
PCDH20 (D)	0.0276734
CNTN5 (R)	0.0261992
RIOX1 (R)	0.0229617
H2AFJ (R)	0.0216089
C2CD4B (R)	0.0193722
hsa-mir-3609 (M)	0.0173554
hsa-mir-375 (M)	0.00702852
hsa-mir-4652 (M)	0.00686478
hsa-mir-31 (M)	0.00668464
hsa-mir-452 (M)	0.00485977
C2orf78 (D)	0.00420594
hsa-mir-1910 (M)	0
hsa-mir-2276 (M)	0
hsa-mir-7974 (M)	0
HOXA10 (D)	0
HIST1H3E (D)	0
HOXB13 (D)	0

## Sheet: Supplementary Table-S9
Supplementary Table S9. Class-specific and mean SHAP feature importance scores for the genomic subtype classification model. Mean absolute SHAP (SHapley Additive exPlanations) values for each feature in the top-performing MLP genomic subtype classifier, computed across all samples in the combined external test sets (Set-2 and Set-3) on a per-class basis. Features are annotated by molecular data t…
Feature	CNV-High	CNV-Low	MSI-H	POLE	Mean Importance
PPP4R4 (R)	0.080723	0.645131	0.154612	0.569799	0.362566
MSH4 (R)	0.264178	0.315028	0.478767	0.349983	0.351989
MLH1 (R)	0.150682	0.390018	0.655479	0.204695	0.350219
EPM2AIP1 (R)	0.359794	0.222051	0.713757	0.095864	0.347866
hsa-mir-378a (M)	0.504261	0.45777	0.10525	0.184917	0.31305
MED14OS (R)	0.188525	0.652433	0.212716	0.166421	0.305024
RPS18P9 (R)	0.284977	0.053094	0.322241	0.553572	0.303471
LYG1 (R)	0.094011	0.410683	0.47895	0.18512	0.292191
CYP8B1 (D)	0.190785	0.09487	0.300859	0.573098	0.289903
AC009237.3 (R)	0.540072	0.310727	0.252316	0.05121	0.288581
AC245407.1 (R)	0.229169	0.337356	0.475801	0.1067	0.287256
RENO1 (R)	0.316435	0.280915	0.458791	0.083606	0.284937
AC131159.2 (R)	0.351327	0.139082	0.048488	0.551669	0.272642
hsa-mir-490 (M)	0.307217	0.357618	0.178836	0.229668	0.268335
RPS27L (R)	0.519636	0.250767	0.098993	0.202375	0.267942
CDKN2A (R)	0.577704	0.136549	0.144103	0.211769	0.267531
PAX9 (D)	0.239716	0.317267	0.252337	0.259183	0.267126
hsa-mir-934 (M)	0.442746	0.073217	0.143401	0.394977	0.263585
IGSF9B (D)	0.469308	0.381126	0.136299	0.066989	0.26343
FGD2 (D)	0.466362	0.361539	0.159408	0.061371	0.26217
FMO1 (R)	0.254925	0.147829	0.453482	0.179455	0.258923
CHRNB1 (D)	0.202272	0.203854	0.464574	0.159847	0.257637
CUZD1 (D)	0.208081	0.391542	0.119476	0.304447	0.255887
CPXM1 (D)	0.273326	0.075772	0.480051	0.174225	0.250844
HTR1D (D)	0.116104	0.27241	0.275286	0.332444	0.249061
hsa-mir-26b (M)	0.381946	0.098402	0.344115	0.167477	0.247985
hsa-mir-548o (M)	0.233728	0.074382	0.48472	0.19223	0.246265
AL590139.1 (R)	0.069579	0.130122	0.477595	0.298243	0.243885
CD5L (D)	0.303722	0.384367	0.137551	0.146582	0.243056
CD8B2 (R)	0.399909	0.442482	0.065559	0.0547	0.240662
SLC16A4 (D)	0.243186	0.279777	0.36621	0.07026	0.239858
LOC285370 (D)	0.466965	0.337209	0.113719	0.040551	0.239611
AC009237.15 (R)	0.450696	0.144965	0.303429	0.059182	0.239568
FILIP1 (D)	0.274753	0.203908	0.053288	0.421332	0.23832
hsa-mir-155 (M)	0.060469	0.386087	0.137219	0.360204	0.235995
AC079834.2 (R)	0.046562	0.43441	0.318956	0.121513	0.23036
PTMAP4 (R)	0.241675	0.080846	0.440636	0.158016	0.230293
ST18 (D)	0.373472	0.405607	0.049915	0.083851	0.228211
hsa-mir-1266 (M)	0.329104	0.095004	0.159217	0.328827	0.228038
KISS1R (R)	0.490488	0.059105	0.131803	0.226033	0.226857
hsa-mir-548j (M)	0.305421	0.119573	0.06451	0.416327	0.226458
hsa-mir-140 (M)	0.18916	0.111662	0.347394	0.24233	0.222637
JSRP1 (R)	0.098882	0.086004	0.456969	0.245567	0.221855
hsa-mir-624 (M)	0.16824	0.216315	0.200843	0.301038	0.221609
ZFP106 (D)	0.100364	0.268984	0.090424	0.420625	0.220099
hsa-mir-320d (M)	0.398126	0.065651	0.266493	0.149517	0.219947
hsa-mir-139 (M)	0.129572	0.244764	0.062994	0.43957	0.219225
hsa-mir-23b (M)	0.188603	0.405631	0.071551	0.209945	0.218933
UBE2E2 (R)	0.285592	0.222697	0.238453	0.115909	0.215663
ZNF366 (D)	0.059923	0.180994	0.236673	0.383702	0.215323
hsa-mir-5010 (M)	0.162715	0.378114	0.269293	0.038592	0.212179
hsa-mir-27b (M)	0.170261	0.257679	0.177792	0.234024	0.209939
ZNF217 (D)	0.250626	0.091246	0.196436	0.300327	0.209659
AL355312.3 (R)	0.215749	0.366427	0.046711	0.20678	0.208917
HIST1H2AI (D)	0.147732	0.100631	0.264516	0.307268	0.205037
LILRA1 (D)	0.0692	0.043957	0.356055	0.349189	0.2046
hsa-mir-3074 (M)	0.363533	0.175324	0.047197	0.227614	0.203417
MSL3L2 (D)	0.27133	0.111588	0.241463	0.177742	0.200531
hsa-mir-659 (M)	0.161028	0.20171	0.041635	0.390585	0.19874
RPL22P24 (R)	0.083653	0.228742	0.271565	0.206733	0.197673
H3FC (R)	0.21547	0.054002	0.455326	0.06371	0.197127
AL161669.3 (R)	0.334397	0.085223	0.310835	0.053066	0.19588
GPR150 (D)	0.074077	0.184522	0.261665	0.252708	0.193243
hsa-mir-6744 (M)	0.104493	0.074627	0.411669	0.174931	0.19143
PABPC4L (D)	0.08386	0.263091	0.355819	0.05038	0.188287
hsa-mir-33a (M)	0.240193	0.410081	0.060654	0.041496	0.188106
RAP2CP1 (R)	0.118951	0.050061	0.329522	0.24584	0.186093
AC023157.3 (R)	0.157742	0.167725	0.246684	0.171079	0.185807
ROBO1 (D)	0.24343	0.107787	0.319713	0.067821	0.184688
C2CD4B (R)	0.177536	0.387712	0.043102	0.119692	0.18201
EXO5 (R)	0.041349	0.170706	0.282447	0.226983	0.180371
hsa-mir-197 (M)	0.24557	0.293623	0.060019	0.115471	0.178671
IL1RL2 (R)	0.273684	0.103545	0.090656	0.244225	0.178028
hsa-mir-1287 (M)	0.132818	0.122494	0.262785	0.192512	0.177652
RARA (D)	0.048014	0.364197	0.053218	0.23676	0.175547
TMEM63C (R)	0.29302	0.23083	0.118317	0.055822	0.174498
RNU6-1069P (R)	0.219449	0.189461	0.1428	0.131456	0.170791
hsa-mir-425 (M)	0.232545	0.092509	0.042212	0.312667	0.169983
hsa-mir-1468 (M)	0.255775	0.2937	0.041683	0.083562	0.16868
hsa-mir-205 (M)	0.044955	0.336151	0.089137	0.201876	0.16803
KCNK2 (D)	0.116171	0.045226	0.262192	0.236733	0.165081
HENMT1 (R)	0.233389	0.219197	0.1316	0.066745	0.162733
hsa-mir-223 (M)	0.094436	0.202542	0.141297	0.206769	0.161261
C22orf28 (D)	0.196041	0.070528	0.114582	0.26235	0.160875
AC007537.1 (R)	0.270533	0.045316	0.29223	0.033452	0.160383
hsa-mir-5696 (M)	0.195556	0.128139	0.214508	0.094601	0.158201
hsa-mir-4781 (M)	0.147328	0.139181	0.050523	0.293126	0.15754
ELF5 (D)	0.153903	0.275887	0.058166	0.139394	0.156837
C3orf63 (D)	0.125339	0.149677	0.294693	0.056068	0.156444
RPL22P13 (R)	0.119828	0.046137	0.276588	0.175509	0.154515
HOXA7 (D)	0.042544	0.202897	0.06076	0.309091	0.153823
PCDHB11 (D)	0.039725	0.114193	0.259818	0.199113	0.153212
RIOX1 (R)	0.188746	0.056343	0.202355	0.164051	0.152874
HIST1H2AB (D)	0.06736	0.242797	0.253489	0.04702	0.152667
SLC22A16 (D)	0.174661	0.11994	0.067351	0.248379	0.152583
ZNF204P (D)	0.205396	0.086793	0.044247	0.271308	0.151936
SLFN13 (R)	0.144915	0.073434	0.116481	0.252706	0.146884
hsa-mir-217 (M)	0.206695	0.136832	0.089426	0.150577	0.145882
TNPO2 (D)	0.111719	0.182752	0.245126	0.043395	0.145748
hsa-mir-514a (M)	0.082093	0.190474	0.051897	0.251074	0.143884
hsa-mir-153 (M)	0.20411	0.053882	0.116147	0.199449	0.143397
hsa-mir-3065 (M)	0.138633	0.149871	0.088273	0.19057	0.141837
NRTN (D)	0.166194	0.038151	0.067458	0.291979	0.140945
hsa-mir-34a (M)	0.159459	0.083931	0.040988	0.279345	0.140931
AC087343.1 (R)	0.228496	0.045788	0.23678	0.049752	0.140204
KCNJ2-AS1 (R)	0.052994	0.215948	0.076099	0.21152	0.13914
C2orf78 (D)	0.045756	0.324809	0.086898	0.095424	0.138222
H2AFJ (R)	0.208898	0.070774	0.217998	0.054404	0.138019
hsa-mir-95 (M)	0.056061	0.189333	0.089485	0.216686	0.137891
HIST1H3J (D)	0.271809	0.043215	0.048896	0.183408	0.136832
RNLS (R)	0.219106	0.048487	0.190366	0.080678	0.134659
hsa-mir-499a (M)	0.047689	0.260199	0.165872	0.057759	0.13288
AC239803.4 (R)	0.049544	0.171832	0.263008	0.043002	0.131847
hsa-mir-4521 (M)	0.151578	0.103752	0.120951	0.144418	0.130175
HOXA4 (D)	0.22157	0.052699	0.067427	0.173266	0.12874
C2orf74 (D)	0.099496	0.137542	0.170173	0.107158	0.128592
PGAP1 (D)	0.194132	0.058035	0.059606	0.197697	0.127367
hsa-mir-126 (M)	0.049407	0.065764	0.220795	0.172306	0.127068
hsa-mir-651 (M)	0.108572	0.164669	0.056632	0.176319	0.126548
hsa-mir-138 (M)	0.225836	0.100279	0.119046	0.056364	0.125381
AL121601.1 (R)	0.266957	0.042991	0.131023	0.057523	0.124624
hsa-mir-132 (M)	0.214898	0.06499	0.130288	0.085859	0.124009
RPL22L1 (R)	0.217702	0.060783	0.147271	0.055953	0.120427
ZNF223 (D)	0.237267	0.046691	0.14495	0.039911	0.117205
hsa-mir-130b (M)	0.110189	0.184393	0.100892	0.07106	0.116633
LIN7A (D)	0.03323	0.052322	0.207872	0.165562	0.114746
hsa-mir-2114 (M)	0.079641	0.066789	0.156975	0.143381	0.111697
C3AR1 (D)	0.114537	0.142351	0.127889	0.056647	0.110356
hsa-mir-210 (M)	0.083295	0.144159	0.082043	0.120419	0.107479
THADA (R)	0.145295	0.079971	0.130693	0.062485	0.104611
HIST1H2BE (D)	0.160189	0.066182	0.089043	0.093162	0.102144
SDHAP3 (D)	0.162626	0.064993	0.075877	0.105021	0.102129
hsa-mir-1910 (M)	0.05145	0.125731	0.158522	0.071661	0.101841
FOXB2 (D)	0.051717	0.09092	0.134313	0.130011	0.10174
CYP2B7P1 (D)	0.140222	0.04069	0.177692	0.047421	0.101506
hsa-mir-744 (M)	0.071513	0.050061	0.160722	0.113076	0.098843
TMPRSS12 (D)	0.083161	0.184856	0.068137	0.054952	0.097776
CGAS (R)	0.060767	0.100002	0.090277	0.139482	0.097632
hsa-mir-589 (M)	0.04244	0.076744	0.145081	0.121707	0.096493
hsa-mir-4652 (M)	0.042988	0.07536	0.099049	0.154012	0.092852
HIST1H3C (D)	0.04743	0.074452	0.15636	0.053227	0.082867
RETNLB (D)	0.116469	0.071206	0.037095	0.076366	0.075284
hsa-mir-147b (M)	0.083631	0.056113	0.099845	0.046515	0.071526
hsa-mir-708 (M)	0.079714	0.045717	0.090732	0.067114	0.070819
H3F3AP6 (R)	0.084557	0.07411	0.072269	0.043665	0.06865
hsa-mir-4728 (M)	0.161854	0.037916	0.04425	0.028876	0.068224
hsa-let-7c (M)	0.051128	0.062719	0.096067	0.056579	0.066623
HCG11 (R)	0.046603	0.079316	0.062564	0.064913	0.063349
C4orf37 (D)	0.039315	0.046148	0.03591	0.106741	0.057029
AC009237.14 (R)	0.079935	0.052941	0.049408	0.042986	0.056318

[truncated: 1 more sheets: Supplementary Table-S10]
