# Supplementary material
Source: Research Square preprint supplement (doi:10.21203/rs.3.rs-9448785/v1)
Supplement: Supplementary file 1 [file 8f4abd8cacfb0e4c5e3c1cb5.pdf]

# Supplementary Methods for “EMMA-STRAT: A Multi-Omics Based Machine Learning Framework for Stratification of Endometrial Carcinoma Molecular Subtypes and MSI Status”

Naisarg Patel<sup>1,2</sup>, Andres Salumets<sup>1,2,3\*</sup>, Vijayachitra Modhukur<sup>1,2\*</sup>

1. *Celvia CC AS, Tartu, Estonia*
2. *Department of Obstetrics and Gynecology, Institute of Clinical Medicine, University of Tartu, L. Puusepa 8, Tartu, Estonia*
3. *Division of Obstetrics and Gynecology, Department of Clinical Science, Intervention and Technology (CLINTEC), Karolinska Institute, and Karolinska University Hospital, Stockholm, Sweden*

**\* To whom correspondence should be addressed.**

Dr. Vijayachitra Modhukur, Department of Obstetrics and Gynaecology, Institute of Clinical Medicine, University of Tartu, Tartu, Estonia. E-mail: [vijayachitra.modhukur@ut.ee](mailto:vijayachitra.modhukur@ut.ee)

**\* Correspondence may also be addressed to**

Prof. Andres Salumets, Division of Obstetrics and Gynaecology, Department of Clinical Science, Intervention and Technology (CLINTEC), Karolinska Institutet, and Karolinska University Hospital, Stockholm, Sweden. E-mail: [andres.salumets@ki.se](mailto:andres.salumets@ki.se)

# S1. Model construction and training details

All models were trained on feature matrices produced by the project's preprocessing pipeline and loaded via `model_helper.get_sets(...)`, which returns (i) selected and scaled feature matrices for training and evaluation splits and (ii) encoded class labels. Hyperparameters were tuned with Optuna to maximise 5-fold stratified cross-validated macro-F1 on the training split (`StratifiedKFold`, `n_splits=5`, `shuffle=True`, `random_state=19`). Random seeds were fixed (NumPy seed = 19; TensorFlow seed = 19 for neural models). Class imbalance was handled using balanced class weights (either via model `class_weight='balanced'` or explicit per-class weights).

## S1.1 k-Nearest Neighbours (KNN)

For the KNN classifier, each sample is represented by its scaled molecular feature vector and classification is performed by majority vote (or distance-weighted vote) among the  $k$  nearest samples in feature space using `sklearn.neighbors.KNeighborsClassifier` [1, 2].

Hyperparameters were optimised with Optuna over: number of neighbours  $k$  in [3, 50]; neighbour weighting scheme in {uniform, distance}; distance metric in {euclidean, manhattan, minkowski, chebyshev}; Minkowski exponent  $p$  in [1, 5] only when metric='minkowski' (otherwise  $p=2$ ); and `leaf_size` in [10, 50].

The objective function computed the mean macro-F1 across 5-fold stratified cross-validation on the training split. The final KNN model was then refit on the full training split with the best hyperparameters and evaluated on the internal validation set and external test sets.

## S1.2 LightGBM gradient-boosted decision trees (LGBM)

For the LightGBM classifier, boosted decision trees were trained using `lightgbm.LGBMClassifier` with balanced class weights (`class_weight='balanced'`), `random_state=19`, and multithreading enabled (`n_jobs=-1`). The objective function was selected based on the number of classes: `objective='binary'` for two-class problems and `objective='multiclass'` with `num_class` set accordingly for multi-class problems [3].

Hyperparameters were optimised with Optuna over: `n_estimators` in [100, 1000] (step 100); `learning_rate` in [0.01, 0.3] on a log scale; `num_leaves` in [15, 255]; `max_depth` in [3, 15]; `min_child_samples` in [5, 100]; `subsample` in [0.5, 1.0]; `colsample_bytree` in [0.5, 1.0]; L1 and L2 regularisation (`reg_alpha`, `reg_lambda`) each in [1e-8, 10] on a log scale; `min_split_gain` in [0.0, 1.0]; and `subsample_freq` in [1, 10] only when `subsample < 1.0` (otherwise `subsample_freq=0`).

During cross-validation, each fold was trained with early stopping (`stopping_rounds=50`) using the fold's held-out partition as an evaluation set, and macro-F1 was computed on fold predictions. The final model was refit on the full training split using the best hyperparameters and evaluated on the internal validation set and external test sets.

Note: in the current `lgbm.py` script, Optuna is invoked with `n_trials=1`; the search space and objective function are as described above.

### S1.3 Random Forest (RF)

For the Random Forest classifier, an ensemble of decision trees was trained using `sklearn.ensemble.RandomForestClassifier` with `class_weight='balanced'`, `random_state=19`, and parallel training enabled (`n_jobs=-1`). Each tree is trained on a bootstrap sample (optional) and split criteria are chosen to maximise impurity reduction, with additional regularisation via minimum impurity decrease [4].

Hyperparameters were optimised with Optuna over: `n_estimators` in [50, 500] (step 50); `max_depth` in [3, 30]; `min_samples_split` in [2, 20]; `min_samples_leaf` in [1, 10]; `max_features` in {`sqrt`, `log2`, `None`}; `bootstrap` in {`True`, `False`}; `min_impurity_decrease` in [0.0, 0.2]; and `max_samples` in [0.5, 1.0] when `bootstrap=True` (otherwise `max_samples=None`).

Performance was assessed as mean macro-F1 across 5-fold stratified cross-validation on the training split. The final RF model was then trained on the full training split using the best hyperparameters and evaluated on the internal validation set and external test sets.

### S1.4 Multilayer Perceptron (MLP)

For the MLP classifier, a fully connected neural network was implemented in TensorFlow/Keras as a feed-forward multilayer perceptron operating on scaled feature vectors. The network consists of an input layer followed by 2–4 hidden layers. Each hidden layer applies: `Dense(hidden_dim, ReLU)` with L2 weight regularisation; `LayerNormalization`; and `Dropout`. The output layer is `Dense(num_classes)` with no activation, producing class logits [5].

Hyperparameters were optimised with Optuna over: number of hidden layers in [2, 4]; `hidden_dim` in [64, 512] (step 64) and repeated across layers; dropout rate in [0.1, 0.5]; learning rate in [1e-4, 1e-2] on a log scale; `batch_size` in {32, 64, 128, 256}; and L2 regularisation strength `l2_reg` in [1e-6, 1e-3] on a log scale.

Training used the Adam optimiser with gradient clipping (`clipnorm=1.0`) and sparse categorical cross-entropy loss (`from_logits=True`). Class imbalance was handled via per-class weights computed from the training labels using `sklearn.utils.class_weight.compute_class_weight('balanced')`. Early stopping was applied based on a custom validation macro-F1 metric computed at the end of each epoch (`patience=10` during hyperparameter optimisation; `patience=20` during final training), restoring the best weights. During optimisation, each Optuna trial evaluated the mean validation macro-F1 across 5-fold stratified CV (up to 50 epochs per fold). The final model was trained on the full training split with the selected hyperparameters (up to 150 epochs with early stopping) and evaluated on the internal validation set and external test sets.

### S1.5 Graph Neural Network (GNN)

For the GNN classifier, samples were represented as nodes in a sample-level graph (one node per patient), with each node feature vector comprising the scaled molecular features. A k-nearest neighbour (k-NN) graph was constructed in feature space using `sklearn.neighbors.kneighbors_graph` with `mode='distance'` (and `include_self=True` in the current implementation). For a chosen k, directed edges are formed between nodes according to the k-NN adjacency; raw Euclidean distances `d_ij` were transformed into similarity-based edge weights using a Gaussian (RBF) kernel:

$$w_{ij} = \exp\left(-\frac{d_{ij}^2}{2\sigma^2}\right)$$

where  $d_{ij}$  is the Euclidean distance between nodes  $i$  and  $j$  in the molecular feature space, and  $\sigma$  is set adaptively as the mean of all k-NN distances in the graph, ensuring edge weights lie in the interval (0,1] with geometrically proximate samples receiving stronger connections. The resulting weighted adjacency was stored as an edge feature named 'weight' [6].

The GNN was implemented with TensorFlow GNN. Node features were first projected to a hidden dimension using a Dense(hidden\_dim, ReLU) layer with L2 regularisation followed by Dropout. Message passing then proceeded through num\_layers stacked mt\_albis.MtAlbisGraphUpdate layers configured with: units=hidden\_dim; message\_dim=max(16, hidden\_dim//2); attention\_type='none'; simple\_conv\_reduce\_type='sum' (to incorporate weighted aggregation); normalization\_type='layer'; next\_state\_type='residual' (residual updates); and state\_dropout\_rate=dropout. After the final message-passing layer, node embeddings were read out directly (node classification setting) and mapped to class logits via a final Dense(num\_classes) layer.

Hyperparameters were optimised with Optuna over: num\_layers in [2, 4]; hidden\_dim in [64, 512] (step 64); dropout rate in [0.1, 0.5]; learning rate in [1e-4, 1e-2] on a log scale; L2 regularisation l2\_reg in [1e-6, 1e-3] on a log scale; and k (k\_neighbors) in [5, 20].

Training used Adam with gradient clipping (clipnorm=1.0) and sparse categorical cross-entropy (from\_logits=True). Validation macro-F1 was computed each epoch by applying softmax to logits and comparing argmax predictions to node labels; early stopping restored the best weights (patience=10 during hyperparameter optimisation; patience=20 for final training). Class imbalance was handled with balanced class weights computed from labels.

To avoid cross-split graph leakage, graphs were constructed independently from the feature matrices of each split (training fold, validation fold, internal validation set, and external test sets) rather than building a single transductive graph spanning multiple splits.

## S1.6 Support Vector Machine (SVM)

For the SVM classifier, a kernel SVM was trained using sklearn.svm.SVC with probability estimates enabled (probability=True) and class imbalance handled via class\_weight='balanced'. Input samples were represented by their scaled feature vectors [7].

Hyperparameters were optimised with Optuna over: C in [1e-2, 1e2] on a log scale; kernel in {rbf, linear, poly, sigmoid}; and gamma chosen either categorically as {'scale', 'auto'} or as a numeric value gamma\_value in [1e-4, 1e1] on a log scale. For the polynomial kernel, degree was tuned in [2, 5] and coef0 in [0, 10]; for the sigmoid kernel, coef0 was tuned in [0, 10].

Performance was assessed as mean macro-F1 over 5-fold stratified cross-validation on the training split. The final SVM model was then refit on the full training split using the best hyperparameters and evaluated on the internal validation set and external test sets.
